# Supplementary material for: Whole Blood Transcriptome Sequencing Reveals Gene Expression Differences between Dapulian and Landrace Piglets
Source: Hindawi journal article supplement (doi:10.1155/2016/7907980), 2016-01-01
Supplement: f1 [file 7907980.f1.xls]

#KEGG_n	36	KEGG_N	6902
#Pathway	ko_ID	Unigene	gene	Unigene_all	gene_all
Alanine, aspartate and glutamate metabolism	ko00250	1	37	36	6902	ENSSSCG00000016056	K01425
Phagosome	ko04145	1	166	36	6902	Pig_newGene_5987	K06751
Metabolism of xenobiotics by cytochrome P450	ko00980	1	55	36	6902	ENSSSCG00000022351	K00799
Ribosome	ko03010	1	120	36	6902	ENSSSCG00000003746	K02998
Porphyrin and chlorophyll metabolism	ko00860	1	46	36	6902	ENSSSCG00000004541	K01772
Pancreatic cancer	ko05212	1	86	36	6902	ENSSSCG00000007229	K04570
Gastric acid secretion	ko04971	1	88	36	6902	ENSSSCG00000009561	K01543
Cell adhesion molecules (CAMs)	ko04514	1	163	36	6902	Pig_newGene_5987	K06751
Complement and coagulation cascades	ko04610	3	76	36	6902	ENSSSCG00000000712;ENSSSCG00000007115;ENSSSCG00000024791	K03900+K03907+K04008
Leishmaniasis	ko05140	1	72	36	6902	ENSSSCG00000022737	K04729
Allograft rejection	ko05330	1	37	36	6902	Pig_newGene_5987	K06751
Proximal tubule bicarbonate reclamation	ko04964	1	28	36	6902	ENSSSCG00000016056	K01425
Viral myocarditis	ko05416	1	78	36	6902	Pig_newGene_5987	K06751
Type I diabetes mellitus	ko04940	1	42	36	6902	Pig_newGene_5987	K06751
Parkinson's disease	ko05012	1	137	36	6902	ENSSSCG00000000045	K03950
Small cell lung cancer	ko05222	1	104	36	6902	ENSSSCG00000007229	K04570
Tight junction	ko04530	1	143	36	6902	ENSSSCG00000003586	K06107
Chronic myeloid leukemia	ko05220	1	86	36	6902	ENSSSCG00000007229	K04570
Melanogenesis	ko04916	1	115	36	6902	ENSSSCG00000008842	K05091
Drug metabolism - cytochrome P450	ko00982	1	60	36	6902	ENSSSCG00000022351	K00799
Glycosylphosphatidylinositol(GPI)-anchor biosynthesis	ko00563	1	29	36	6902	ENSSSCG00000023383	K05291
Antigen processing and presentation	ko04612	1	67	36	6902	Pig_newGene_5987	K06751
Peroxisome	ko04146	2	89	36	6902	ENSSSCG00000028299;ENSSSCG00000029075	K07513+K01897
Endocytosis	ko04144	3	245	36	6902	ENSSSCG00000008842;ENSSSCG00000014441;Pig_newGene_5987	K05091+K05090+K06751
Purine metabolism	ko00230	1	213	36	6902	ENSSSCG00000022912	K01081
Malaria	ko05144	1	67	36	6902	ENSSSCG00000022737	K04729
Chagas disease (American trypanosomiasis)	ko05142	1	125	36	6902	ENSSSCG00000022737	K04729
Nitrogen metabolism	ko00910	2	26	36	6902	ENSSSCG00000006140;ENSSSCG00000016056	K01672+K01425
D-Glutamine and D-glutamate metabolism	ko00471	1	5	36	6902	ENSSSCG00000016056	K01425
Acute myeloid leukemia	ko05221	1	67	36	6902	ENSSSCG00000008842	K05091
Glycerophospholipid metabolism	ko00564	1	83	36	6902	ENSSSCG00000026701	K06124
Valine, leucine and isoleucine degradation	ko00280	1	60	36	6902	ENSSSCG00000028299	K07513
Ribosome biogenesis in eukaryotes	ko03008	1	92	36	6902	ENSSSCG00000015056	K13288
Alzheimer's disease	ko05010	1	199	36	6902	ENSSSCG00000000045	K03950
Natural killer cell mediated cytotoxicity	ko04650	1	130	36	6902	Pig_newGene_5987	K06751
Graft-versus-host disease	ko05332	1	35	36	6902	Pig_newGene_5987	K06751
Ubiquitin mediated proteolysis	ko04120	1	165	36	6902	ENSSSCG00000029901	K10581
Glutathione metabolism	ko00480	2	55	36	6902	ENSSSCG00000022351;Pig_newGene_2884	K00799+K00432
Arachidonic acid metabolism	ko00590	2	70	36	6902	ENSSSCG00000017923;Pig_newGene_2884	K00460+K00432
Linoleic acid metabolism	ko00591	1	28	36	6902	ENSSSCG00000017923	K00460
Neuroactive ligand-receptor interaction	ko04080	4	342	36	6902	ENSSSCG00000003714;ENSSSCG00000006788;ENSSSCG00000016902;ENSSSCG00000016903	K04152+K04268+K01352+K01352
Collecting duct acid secretion	ko04966	2	30	36	6902	ENSSSCG00000009561;ENSSSCG00000017358	K01543+K06573
Autoimmune thyroid disease	ko05320	1	47	36	6902	Pig_newGene_5987	K06751
Pyruvate metabolism	ko00620	1	49	36	6902	ENSSSCG00000023157	K01069
Osteoclast differentiation	ko04380	1	139	36	6902	ENSSSCG00000014441	K05090
Hematopoietic cell lineage	ko04640	3	94	36	6902	ENSSSCG00000008842;ENSSSCG00000014441;ENSSSCG00000024791	K05091+K05090+K04008
Pathways in cancer	ko05200	4	387	36	6902	ENSSSCG00000007229;ENSSSCG00000008842;ENSSSCG00000010399;ENSSSCG00000014441	K04570+K05091+K09289+K05090
Toxoplasmosis	ko05145	2	143	36	6902	ENSSSCG00000007229;ENSSSCG00000022737	K04570+K04729
Salivary secretion	ko04970	1	100	36	6902	ENSSSCG00000029889	K13899
Cytokine-cytokine receptor interaction	ko04060	2	277	36	6902	ENSSSCG00000008842;ENSSSCG00000014441	K05091+K05090
Thyroid cancer	ko05216	1	28	36	6902	ENSSSCG00000010399	K09289
Apoptosis	ko04210	3	113	36	6902	ENSSSCG00000007229;ENSSSCG00000014965;ENSSSCG00000022737	K04570+K01173+K04729
PPAR signaling pathway	ko03320	2	81	36	6902	ENSSSCG00000028299;ENSSSCG00000029075	K07513+K01897
Biosynthesis of unsaturated fatty acids	ko01040	1	19	36	6902	ENSSSCG00000028299	K07513
Arginine and proline metabolism	ko00330	1	62	36	6902	ENSSSCG00000016056	K01425
ECM-receptor interaction	ko04512	1	111	36	6902	ENSSSCG00000000712	K03900
Jak-STAT signaling pathway	ko04630	2	174	36	6902	ENSSSCG00000007229;ENSSSCG00000022485	K04570+K11225
Pyrimidine metabolism	ko00240	1	115	36	6902	ENSSSCG00000022912	K01081
Fatty acid metabolism	ko00071	2	54	36	6902	ENSSSCG00000028299;ENSSSCG00000029075	K07513+K01897
Adipocytokine signaling pathway	ko04920	1	76	36	6902	ENSSSCG00000029075	K01897
Amino sugar and nucleotide sugar metabolism	ko00520	1	51	36	6902	ENSSSCG00000000572	K00983
Huntington's disease	ko05016	1	203	36	6902	ENSSSCG00000000045	K03950
Nicotinate and nicotinamide metabolism	ko00760	1	35	36	6902	ENSSSCG00000022912	K01081
African trypanosomiasis	ko05143	1	44	36	6902	ENSSSCG00000022737	K04729
Amyotrophic lateral sclerosis (ALS)	ko05014	1	63	36	6902	ENSSSCG00000007229	K04570
Toll-like receptor signaling pathway	ko04620	1	111	36	6902	ENSSSCG00000022737	K04729
Focal adhesion	ko04510	1	251	36	6902	ENSSSCG00000000712	K03900
Oxidative phosphorylation	ko00190	2	138	36	6902	ENSSSCG00000000045;ENSSSCG00000009561	K03950+K01543
