# Supplementary material for: Whole Blood Transcriptome Sequencing Reveals Gene Expression Differences between Dapulian and Landrace Piglets
Source: Hindawi journal article supplement (doi:10.1155/2016/7907980), 2016-01-01
Supplement: f2 [file 7907980.f2.xls]

#Chro	Pos	Genic/Intergenic	RefBase	L1_Base	L1_Qual	L1_Depth	L1_Genotype	L2_Base	L2_Qual	L2_Depth	L2_Genotype	L3_Base	L3_Qual	L3_Depth	L3_Genotype	D1_Base	D1_Qual	D1_Depth	D1_Genotype	D2_Base	D2_Qual	D2_Depth	D2_Genotype
1	1070536	ENSSSCG00000004008;ENSSSCG00000004010	G	.	.	.	.	.	.	.	.	.	.	.	.	A	99	51	R	A	99	33	R
1	1088955	ENSSSCG00000004008;ENSSSCG00000004010	T	.	.	.	.	.	.	.	.	.	.	.	.	G	33	6	G	G	58	7	K
1	1090950	ENSSSCG00000004008;ENSSSCG00000004010	T	.	.	.	.	.	.	.	.	.	.	.	.	C	45	8	C	C	95	8	Y
1	3654205	ENSSSCG00000004022	G	.	.	.	.	.	.	.	.	.	.	.	.	C	77	11	S	C	40	11	S
1	3657570	ENSSSCG00000004022	A	.	.	.	.	.	.	.	.	.	.	.	.	G	67	19	R	G	89	18	R
1	8333424	ENSSSCG00000004033	C	.	.	.	.	.	.	.	.	.	.	.	.	T	99	34	Y	T	63	11	T
1	8341361	ENSSSCG00000004033	C	.	.	.	.	.	.	.	.	.	.	.	.	T	99	12	Y	T	57	10	T
1	9039449	ENSSSCG00000004042	A	.	.	.	.	.	.	.	.	.	.	.	.	T	99	34	T	T	99	48	T
1	9380948	ENSSSCG00000004047	A	.	.	.	.	.	.	.	.	.	.	.	.	G	87	16	G	G	99	21	G
1	9381908	ENSSSCG00000004047	T	.	.	.	.	.	.	.	.	.	.	.	.	C	88	24	Y	C	99	37	Y
1	9382041	ENSSSCG00000004047	T	.	.	.	.	.	.	.	.	.	.	.	.	C	99	16	Y	C	99	35	Y
1	9382058	ENSSSCG00000004047	G	.	.	.	.	.	.	.	.	.	.	.	.	A	99	20	R	A	99	40	R
1	9387804	ENSSSCG00000004047	A	.	.	.	.	.	.	.	.	.	.	.	.	G	99	32	R	G	99	50	R
1	9388161	ENSSSCG00000004047	G	.	.	.	.	.	.	.	.	.	.	.	.	T	99	18	K	T	99	35	K
1	9389240	ENSSSCG00000004048	G	.	.	.	.	.	.	.	.	.	.	.	.	T	56	8	K	T	99	18	K
1	9392410	ENSSSCG00000004048	T	.	.	.	.	.	.	.	.	.	.	.	.	C	79	27	C	C	99	42	C
1	9397200	ENSSSCG00000004048	T	.	.	.	.	.	.	.	.	.	.	.	.	C	99	76	C	C	99	75	C
1	9399681	ENSSSCG00000004048;ENSSSCG00000004049	T	.	.	.	.	.	.	.	.	.	.	.	.	C	59	24	Y	C	81	16	Y
1	9399735	ENSSSCG00000004048;ENSSSCG00000004049	T	.	.	.	.	.	.	.	.	.	.	.	.	C	91	27	Y	C	99	27	Y
1	9400025	ENSSSCG00000004048;ENSSSCG00000004049	G	.	.	.	.	.	.	.	.	.	.	.	.	A	75	14	A	A	99	22	A
1	9401956	ENSSSCG00000004049	T	.	.	.	.	.	.	.	.	.	.	.	.	C	91	9	Y	C	99	12	Y
1	9407288	ENSSSCG00000004049	G	.	.	.	.	.	.	.	.	.	.	.	.	A	41	6	R	A	99	25	R
1	9420639	ENSSSCG00000004050	C	.	.	.	.	.	.	.	.	.	.	.	.	A	99	37	M	A	99	28	M
1	9427042	ENSSSCG00000004050	C	.	.	.	.	.	.	.	.	.	.	.	.	T	99	27	T	T	99	27	T
1	9427070	ENSSSCG00000004050	C	.	.	.	.	.	.	.	.	.	.	.	.	T	99	29	T	T	99	26	T
1	9432587	ENSSSCG00000004050	T	.	.	.	.	.	.	.	.	.	.	.	.	C	81	15	C	C	99	40	C
1	10045208	ENSSSCG00000004053	T	.	.	.	.	.	.	.	.	.	.	.	.	C	99	59	Y	C	99	76	Y
1	10050762	ENSSSCG00000004053	C	A	99	53	A	A	99	31	A	A	99	58	A	.	.	.	.	.	.	.	.
1	10050851	ENSSSCG00000004053	A	G	99	38	G	G	99	33	G	G	99	45	G	.	.	.	.	.	.	.	.
1	10385889	ENSSSCG00000004056	G	.	.	.	.	.	.	.	.	.	.	.	.	A	99	83	R	A	99	73	R
1	10469079	ENSSSCG00000004057	C	.	.	.	.	.	.	.	.	.	.	.	.	G	99	42	S	G	99	42	S
1	11892576	ENSSSCG00000004064	C	.	.	.	.	.	.	.	.	.	.	.	.	G	33	6	G	G	63	11	G
1	14572907	ENSSSCG00000004072	G	.	.	.	.	.	.	.	.	.	.	.	.	A	88	7	R	A	61	6	R
1	14574288	ENSSSCG00000004072	T	.	.	.	.	.	.	.	.	.	.	.	.	C	27	5	C	C	97	14	Y
1	14581128	ENSSSCG00000004072	A	.	.	.	.	.	.	.	.	.	.	.	.	G	51	9	G	G	58	16	R
1	16446582	ENSSSCG00000004082	G	.	.	.	.	.	.	.	.	.	.	.	.	A	57	10	A	A	33	6	A
1	16446594	ENSSSCG00000004082	T	.	.	.	.	.	.	.	.	.	.	.	.	C	69	12	C	C	33	8	C
1	16481778	ENSSSCG00000004082	T	.	.	.	.	.	.	.	.	.	.	.	.	C	33	6	C	C	31	17	Y
1	16487930	ENSSSCG00000004082	C	.	.	.	.	.	.	.	.	.	.	.	.	A	69	12	A	A	66	19	M
1	16490802	ENSSSCG00000004082	C	.	.	.	.	.	.	.	.	.	.	.	.	T	63	12	T	T	99	20	Y
1	16490841	ENSSSCG00000004082	C	.	.	.	.	.	.	.	.	.	.	.	.	G	69	13	G	G	99	10	S
1	16507430	ENSSSCG00000004082	T	.	.	.	.	.	.	.	.	.	.	.	.	C	99	18	C	C	99	39	Y
1	17240970	ENSSSCG00000004089	G	.	.	.	.	.	.	.	.	.	.	.	.	A	27	5	A	A	58	6	R
1	17248643	ENSSSCG00000004089	G	.	.	.	.	.	.	.	.	.	.	.	.	A	27	5	A	A	33	6	A
1	17305303	ENSSSCG00000004090	A	.	.	.	.	.	.	.	.	.	.	.	.	T	27	5	T	T	73	12	W
1	18600406	ENSSSCG00000004106	A	.	.	.	.	.	.	.	.	.	.	.	.	G	33	6	G	G	40	5	R
1	18793980	ENSSSCG00000004109	T	.	.	.	.	.	.	.	.	.	.	.	.	C	99	22	C	C	99	25	C
1	18794076	ENSSSCG00000004109	T	.	.	.	.	.	.	.	.	.	.	.	.	C	33	7	C	C	87	15	C
1	18794126	ENSSSCG00000004109	C	.	.	.	.	.	.	.	.	.	.	.	.	G	27	5	G	G	81	14	G
1	18813318	ENSSSCG00000004109	C	.	.	.	.	.	.	.	.	.	.	.	.	A	99	10	M	A	99	14	M
1	18813345	ENSSSCG00000004109	A	.	.	.	.	.	.	.	.	.	.	.	.	G	57	10	G	G	45	9	G
1	18818790	ENSSSCG00000004109	G	.	.	.	.	.	.	.	.	.	.	.	.	C	63	12	C	C	99	28	S
1	18819076	ENSSSCG00000004109	C	.	.	.	.	.	.	.	.	.	.	.	.	T	45	8	T	T	73	14	Y
1	21319456	ENSSSCG00000004117	G	.	.	.	.	.	.	.	.	.	.	.	.	A	51	9	A	A	99	22	A
1	21319720	ENSSSCG00000004117	C	.	.	.	.	.	.	.	.	.	.	.	.	T	63	11	T	T	57	10	T
1	21320082	ENSSSCG00000004117	C	.	.	.	.	.	.	.	.	.	.	.	.	T	81	12	Y	T	99	24	T
1	21320133	ENSSSCG00000004117	C	.	.	.	.	.	.	.	.	.	.	.	.	T	75	16	T	T	99	36	T
1	21320256	ENSSSCG00000004117	A	.	.	.	.	.	.	.	.	.	.	.	.	G	63	11	G	G	99	29	G
1	21320345	ENSSSCG00000004117	T	.	.	.	.	.	.	.	.	.	.	.	.	A	57	10	A	A	99	22	A
1	23480107	ENSSSCG00000004125	A	.	.	.	.	.	.	.	.	.	.	.	.	C	33	5	M	C	28	10	M
1	23480977	ENSSSCG00000004125	G	.	.	.	.	.	.	.	.	.	.	.	.	A	87	8	R	A	99	22	A
1	23480998	ENSSSCG00000004125	A	.	.	.	.	.	.	.	.	.	.	.	.	G	33	6	G	G	99	20	G
1	23481463	ENSSSCG00000004125	C	.	.	.	.	.	.	.	.	.	.	.	.	G	45	8	G	G	57	10	G
1	24149428	ENSSSCG00000004133	T	.	.	.	.	.	.	.	.	.	.	.	.	C	21	5	C	C	63	12	C
1	24202594	ENSSSCG00000004135	A	.	.	.	.	.	.	.	.	.	.	.	.	G	99	8	R	G	99	15	R
1	28517581	ENSSSCG00000004144	C	.	.	.	.	.	.	.	.	.	.	.	.	T	50	13	Y	T	99	21	T
1	28517621	ENSSSCG00000004144	G	.	.	.	.	.	.	.	.	.	.	.	.	A	41	8	R	A	99	26	A
1	28518162	ENSSSCG00000004144	G	.	.	.	.	.	.	.	.	.	.	.	.	T	99	11	K	T	97	33	T
1	28518207	ENSSSCG00000004144	C	.	.	.	.	.	.	.	.	.	.	.	.	T	99	14	Y	T	99	34	T
1	28530933	ENSSSCG00000004144	A	.	.	.	.	.	.	.	.	.	.	.	.	G	27	5	G	G	51	9	G
1	28585480	ENSSSCG00000004145	G	.	.	.	.	.	.	.	.	.	.	.	.	C	87	9	S	C	69	12	C
1	28585493	ENSSSCG00000004145	A	.	.	.	.	.	.	.	.	.	.	.	.	G	27	5	G	G	27	5	G
1	28794175	ENSSSCG00000004148	A	.	.	.	.	.	.	.	.	.	.	.	.	G	45	9	G	G	99	36	R
1	28794247	ENSSSCG00000004148	G	.	.	.	.	.	.	.	.	.	.	.	.	A	81	14	A	A	99	41	R
1	28796261	ENSSSCG00000004148	T	.	.	.	.	.	.	.	.	.	.	.	.	C	99	23	C	C	99	41	Y
1	30388842	ENSSSCG00000004156	C	.	.	.	.	.	.	.	.	.	.	.	.	G	54	6	S	G	58	8	S
1	30398292	ENSSSCG00000004156	A	.	.	.	.	.	.	.	.	.	.	.	.	G	99	11	R	G	99	19	R
1	30408565	ENSSSCG00000004156	A	.	.	.	.	.	.	.	.	.	.	.	.	G	99	30	R	G	99	67	R
1	30408658	ENSSSCG00000004156	C	.	.	.	.	.	.	.	.	.	.	.	.	T	99	37	Y	T	99	69	Y
1	30408674	ENSSSCG00000004156	T	.	.	.	.	.	.	.	.	.	.	.	.	A	99	48	W	A	99	65	W
1	30408691	ENSSSCG00000004156	G	.	.	.	.	.	.	.	.	.	.	.	.	A	99	55	R	A	84	73	R
1	32049125	ENSSSCG00000004166	C	.	.	.	.	.	.	.	.	.	.	.	.	T	27	5	T	T	97	7	Y
1	32069358	ENSSSCG00000004166	A	G	43	15	R	G	51	13	R	G	82	24	R	.	.	.	.	.	.	.	.
1	34482887	ENSSSCG00000004179	G	A	99	10	R	A	27	6	R	A	63	5	R	.	.	.	.	.	.	.	.
1	34487108	ENSSSCG00000004179	G	A	99	45	R	A	99	17	R	A	92	26	R	.	.	.	.	.	.	.	.
1	34487153	ENSSSCG00000004179	G	A	99	45	R	A	99	30	R	A	88	26	R	.	.	.	.	.	.	.	.
1	39592202	ENSSSCG00000004216	A	.	.	.	.	.	.	.	.	.	.	.	.	G	76	9	R	G	63	13	G
1	40468971	ENSSSCG00000004219	C	.	.	.	.	.	.	.	.	.	.	.	.	T	39	7	T	T	51	10	T
1	40936861	ENSSSCG00000004222	C	.	.	.	.	.	.	.	.	.	.	.	.	T	51	9	T	T	99	25	T
1	44443072	ENSSSCG00000004237	T	.	.	.	.	.	.	.	.	.	.	.	.	C	39	7	C	C	99	30	C
1	55752678	ENSSSCG00000004270	C	.	.	.	.	.	.	.	.	.	.	.	.	T	69	13	T	T	57	11	T
1	57271092	ENSSSCG00000004276	A	.	.	.	.	.	.	.	.	.	.	.	.	G	99	18	G	G	99	25	G
1	57279262	ENSSSCG00000004276;ENSSSCG00000026246	A	.	.	.	.	.	.	.	.	.	.	.	.	G	61	19	G	G	57	11	G
1	57279521	ENSSSCG00000004276;ENSSSCG00000026246	G	.	.	.	.	.	.	.	.	.	.	.	.	A	51	11	A	A	99	24	A
1	57279760	ENSSSCG00000004276;ENSSSCG00000026246	G	.	.	.	.	.	.	.	.	.	.	.	.	C	90	18	S	C	92	26	S
1	59276764	ENSSSCG00000004281	G	.	.	.	.	.	.	.	.	.	.	.	.	A	27	5	A	A	99	9	R
1	62791114	ENSSSCG00000004307	G	A	99	25	R	A	81	13	R	A	99	16	R	.	.	.	.	.	.	.	.
1	75149899	ENSSSCG00000004353	T	.	.	.	.	.	.	.	.	.	.	.	.	G	81	16	G	G	99	25	K
1	82045449	ENSSSCG00000004371	A	.	.	.	.	.	.	.	.	.	.	.	.	G	69	14	G	G	99	18	G
1	82054800	ENSSSCG00000004371	A	.	.	.	.	.	.	.	.	.	.	.	.	G	39	7	G	G	99	17	G
1	82059840	ENSSSCG00000004371	G	.	.	.	.	.	.	.	.	.	.	.	.	A	99	24	A	A	99	19	A
1	82059952	ENSSSCG00000004371	G	.	.	.	.	.	.	.	.	.	.	.	.	A	69	12	A	A	99	23	A
1	86400700	ENSSSCG00000004392	C	.	.	.	.	.	.	.	.	.	.	.	.	T	59	6	Y	T	99	11	Y
1	86342024	ENSSSCG00000004394	G	.	.	.	.	.	.	.	.	.	.	.	.	T	57	10	T	T	51	9	T
1	84789191	ENSSSCG00000004408	G	.	.	.	.	.	.	.	.	.	.	.	.	A	99	45	R	A	99	39	R
1	84791696	ENSSSCG00000004412	C	.	.	.	.	.	.	.	.	.	.	.	.	T	99	59	Y	T	99	37	Y
1	84793119	ENSSSCG00000004412	T	.	.	.	.	.	.	.	.	.	.	.	.	C	99	52	Y	C	99	30	Y
1	84721421	ENSSSCG00000004414	T	.	.	.	.	.	.	.	.	.	.	.	.	G	63	12	G	G	99	22	G
1	84700302	ENSSSCG00000004415	G	.	.	.	.	.	.	.	.	.	.	.	.	A	99	15	R	A	99	41	R
1	87145893	ENSSSCG00000004421	T	.	.	.	.	.	.	.	.	.	.	.	.	C	57	10	C	C	99	26	Y
1	92392812	ENSSSCG00000004446	A	G	99	36	R	G	99	14	R	G	99	27	R	.	.	.	.	.	.	.	.
1	101835012	ENSSSCG00000004484	T	.	.	.	.	.	.	.	.	.	.	.	.	C	31	8	C	C	99	30	C
1	105944350	ENSSSCG00000004499	C	T	53	39	Y	T	55	9	Y	T	59	16	Y	.	.	.	.	.	.	.	.
1	105951379	ENSSSCG00000004499	G	A	99	84	R	A	99	32	R	A	99	67	R	.	.	.	.	.	.	.	.
1	108217073	ENSSSCG00000004508	T	.	.	.	.	.	.	.	.	.	.	.	.	A	97	12	W	A	99	26	W
1	108217135	ENSSSCG00000004508	G	.	.	.	.	.	.	.	.	.	.	.	.	A	65	21	R	A	99	41	R
1	109623630	ENSSSCG00000004517	C	T	99	51	Y	T	61	32	Y	T	31	30	Y	.	.	.	.	.	.	.	.
1	109623700	ENSSSCG00000004517	C	T	99	71	Y	T	99	42	Y	T	99	40	Y	.	.	.	.	.	.	.	.
1	109623834	ENSSSCG00000004517	A	G	99	96	R	G	99	41	R	G	99	55	R	.	.	.	.	.	.	.	.
1	109626011	ENSSSCG00000004517	C	T	99	23	Y	T	49	11	Y	T	99	16	Y	.	.	.	.	.	.	.	.
1	116748920	ENSSSCG00000004537	T	.	.	.	.	.	.	.	.	.	.	.	.	C	99	24	Y	C	99	47	Y
1	117636326	ENSSSCG00000004543	G	.	.	.	.	.	.	.	.	.	.	.	.	A	33	6	A	A	99	21	R
1	117641014	ENSSSCG00000004543	T	.	.	.	.	.	.	.	.	.	.	.	.	C	33	6	C	C	54	9	Y
1	117700293	ENSSSCG00000004544	C	.	.	.	.	.	.	.	.	.	.	.	.	T	99	18	T	T	63	14	Y
1	118495487	ENSSSCG00000004552;ENSSSCG00000004554	A	.	.	.	.	.	.	.	.	.	.	.	.	G	99	41	G	G	99	55	R
1	118495711	ENSSSCG00000004552;ENSSSCG00000004554	C	.	.	.	.	.	.	.	.	.	.	.	.	G	99	22	G	G	99	44	S
1	118495790	ENSSSCG00000004552;ENSSSCG00000004554	A	.	.	.	.	.	.	.	.	.	.	.	.	G	99	21	G	G	99	44	R
1	123368603	ENSSSCG00000004578	T	.	.	.	.	.	.	.	.	.	.	.	.	C	99	37	Y	C	99	71	Y
1	124307615	ENSSSCG00000004583	T	.	.	.	.	.	.	.	.	.	.	.	.	C	99	38	Y	C	99	50	Y
1	129014294	ENSSSCG00000004610	T	.	.	.	.	.	.	.	.	.	.	.	.	G	63	8	K	G	99	15	K
1	129142327	ENSSSCG00000004612	A	.	.	.	.	.	.	.	.	.	.	.	.	C	49	19	M	C	99	39	M
1	129142655	ENSSSCG00000004612	A	.	.	.	.	.	.	.	.	.	.	.	.	G	99	39	R	G	99	35	R
1	129143873	ENSSSCG00000004612	C	.	.	.	.	.	.	.	.	.	.	.	.	T	89	19	Y	T	99	35	Y
1	129143946	ENSSSCG00000004612	C	.	.	.	.	.	.	.	.	.	.	.	.	T	99	30	Y	T	99	42	Y
1	129144041	ENSSSCG00000004612	A	.	.	.	.	.	.	.	.	.	.	.	.	G	99	46	R	G	99	50	R
1	132479846	ENSSSCG00000004620	T	.	.	.	.	.	.	.	.	.	.	.	.	G	44	5	K	G	73	12	K
1	134745939	ENSSSCG00000004638	G	.	.	.	.	.	.	.	.	.	.	.	.	A	31	5	R	A	52	18	R
1	136150892	ENSSSCG00000004651	G	.	.	.	.	.	.	.	.	.	.	.	.	T	39	7	T	T	39	7	T
1	136150920	ENSSSCG00000004651	G	.	.	.	.	.	.	.	.	.	.	.	.	T	27	6	T	T	32	7	T
1	143294806	ENSSSCG00000004717	C	.	.	.	.	.	.	.	.	.	.	.	.	A	90	7	M	A	99	14	M
1	143547372	ENSSSCG00000004719	C	.	.	.	.	.	.	.	.	.	.	.	.	T	99	15	Y	T	63	8	Y
1	143742408	ENSSSCG00000004727	G	.	.	.	.	.	.	.	.	.	.	.	.	T	63	7	K	T	33	11	K
1	143864126	ENSSSCG00000004728	A	.	.	.	.	.	.	.	.	.	.	.	.	G	99	20	R	G	99	30	R
1	143905173	ENSSSCG00000004728	C	.	.	.	.	.	.	.	.	.	.	.	.	A	99	15	M	A	99	11	M
1	144137922	ENSSSCG00000004731	A	.	.	.	.	.	.	.	.	.	.	.	.	G	57	10	G	G	57	10	G
1	144940172	ENSSSCG00000004746	G	.	.	.	.	.	.	.	.	.	.	.	.	T	66	7	K	T	30	6	K
1	145259443	ENSSSCG00000004751	G	.	.	.	.	.	.	.	.	.	.	.	.	A	52	5	R	A	74	16	R
1	145715675	ENSSSCG00000004760;ENSSSCG00000004762	A	.	.	.	.	.	.	.	.	.	.	.	.	G	51	9	G	G	25	6	R
1	145717144	ENSSSCG00000004760;ENSSSCG00000004762	T	.	.	.	.	.	.	.	.	.	.	.	.	C	99	29	Y	C	66	7	Y
1	145714861	ENSSSCG00000004760;ENSSSCG00000004762;ENSSSCG00000004763	T	.	.	.	.	.	.	.	.	.	.	.	.	C	57	10	C	C	90	19	Y
1	145979668	ENSSSCG00000004774	T	C	68	11	Y	C	75	13	C	C	41	6	Y	.	.	.	.	.	.	.	.
1	145982809	ENSSSCG00000004774	A	.	.	.	.	.	.	.	.	.	.	.	.	G	36	13	R	G	99	16	R
1	148225819	ENSSSCG00000004791	T	.	.	.	.	.	.	.	.	.	.	.	.	C	76	13	Y	C	90	7	Y
1	148225843	ENSSSCG00000004791	C	.	.	.	.	.	.	.	.	.	.	.	.	A	39	17	M	A	79	8	M
1	148277944	ENSSSCG00000004792	C	.	.	.	.	.	.	.	.	.	.	.	.	T	99	23	Y	T	99	29	Y
1	156065919	ENSSSCG00000004826	C	T	99	17	Y	T	63	7	Y	T	27	6	Y	.	.	.	.	.	.	.	.
1	157491144	ENSSSCG00000004830	G	.	.	.	.	.	.	.	.	.	.	.	.	T	47	5	K	T	27	6	T
1	157521682	ENSSSCG00000004830	C	.	.	.	.	.	.	.	.	.	.	.	.	A	39	7	A	A	26	5	A
1	159887133	ENSSSCG00000004845	C	.	.	.	.	.	.	.	.	.	.	.	.	T	33	7	T	T	33	6	T
1	159918825	ENSSSCG00000004847	A	.	.	.	.	.	.	.	.	.	.	.	.	G	99	26	R	G	99	12	R
1	160546837	ENSSSCG00000004852	C	.	.	.	.	.	.	.	.	.	.	.	.	A	33	6	M	A	99	15	M
1	161557021	ENSSSCG00000004856	G	.	.	.	.	.	.	.	.	.	.	.	.	A	40	7	R	A	63	12	A
1	175329822	ENSSSCG00000004889	T	.	.	.	.	.	.	.	.	.	.	.	.	A	99	33	W	A	99	50	W
1	175331806	ENSSSCG00000004889	A	.	.	.	.	.	.	.	.	.	.	.	.	G	99	32	R	G	99	44	R
1	175347848	ENSSSCG00000004889	T	.	.	.	.	.	.	.	.	.	.	.	.	C	99	19	Y	C	99	36	Y
1	175347866	ENSSSCG00000004889	T	.	.	.	.	.	.	.	.	.	.	.	.	C	99	17	Y	C	99	36	Y
1	180681517	ENSSSCG00000004926	G	.	.	.	.	.	.	.	.	.	.	.	.	A	30	11	R	A	99	19	A
1	182892517	ENSSSCG00000004951	C	.	.	.	.	.	.	.	.	.	.	.	.	G	57	12	S	G	99	28	G
1	183879247	ENSSSCG00000004957;ENSSSCG00000004958	G	.	.	.	.	.	.	.	.	.	.	.	.	T	31	14	K	T	81	14	T
1	195202239	ENSSSCG00000004999	G	.	.	.	.	.	.	.	.	.	.	.	.	A	62	22	R	A	33	6	A
1	199960196	ENSSSCG00000005011	C	.	.	.	.	.	.	.	.	.	.	.	.	T	99	15	Y	T	99	18	Y
1	199966310	ENSSSCG00000005011	C	.	.	.	.	.	.	.	.	.	.	.	.	T	99	23	Y	T	99	28	Y
1	200838781	ENSSSCG00000005022	A	.	.	.	.	.	.	.	.	.	.	.	.	G	99	29	R	G	33	7	G
1	200852997	ENSSSCG00000005022	T	.	.	.	.	.	.	.	.	.	.	.	.	G	61	6	K	G	33	6	G
1	200932897	ENSSSCG00000005023	C	T	99	39	T	T	99	20	T	T	99	27	T	.	.	.	.	.	.	.	.
1	200933158	ENSSSCG00000005023	C	T	99	57	T	T	99	50	T	T	99	68	T	.	.	.	.	.	.	.	.
1	200991451	ENSSSCG00000005024	T	.	.	.	.	.	.	.	.	.	.	.	.	C	99	13	Y	C	99	31	Y
1	208316331	ENSSSCG00000005073	A	.	.	.	.	.	.	.	.	.	.	.	.	G	27	6	G	G	27	5	G
1	211717346	ENSSSCG00000005095	C	.	.	.	.	.	.	.	.	.	.	.	.	T	39	7	T	T	99	25	Y
1	211721195	ENSSSCG00000005095	T	.	.	.	.	.	.	.	.	.	.	.	.	C	99	12	Y	C	99	26	C
1	211791209	ENSSSCG00000005095	C	.	.	.	.	.	.	.	.	.	.	.	.	T	99	10	Y	T	77	24	T
1	211816706	ENSSSCG00000005095	G	.	.	.	.	.	.	.	.	.	.	.	.	A	30	6	R	A	99	30	R
1	212743696	ENSSSCG00000005104	T	.	.	.	.	.	.	.	.	.	.	.	.	C	99	80	Y	C	99	41	Y
1	212754328	ENSSSCG00000005104	A	.	.	.	.	.	.	.	.	.	.	.	.	T	99	67	W	T	99	58	T
1	212754398	ENSSSCG00000005104	T	.	.	.	.	.	.	.	.	.	.	.	.	C	99	43	Y	C	99	33	C
1	212754993	ENSSSCG00000005105	A	.	.	.	.	.	.	.	.	.	.	.	.	G	48	7	R	G	27	7	G
1	212757838	ENSSSCG00000005105	C	.	.	.	.	.	.	.	.	.	.	.	.	T	99	40	Y	T	99	35	Y
1	242115535	ENSSSCG00000005208	G	.	.	.	.	.	.	.	.	.	.	.	.	A	27	5	A	A	87	11	R
1	242994419	ENSSSCG00000005217	G	.	.	.	.	.	.	.	.	.	.	.	.	A	99	47	R	A	99	28	R
1	243039743	ENSSSCG00000005217	T	.	.	.	.	.	.	.	.	.	.	.	.	C	93	16	C	C	76	6	Y
1	252240386	ENSSSCG00000005264	A	.	.	.	.	.	.	.	.	.	.	.	.	C	27	7	M	C	87	26	M
1	257094885	ENSSSCG00000005282	G	.	.	.	.	.	.	.	.	.	.	.	.	A	27	6	R	A	34	6	R
1	264097224	ENSSSCG00000005312	G	C	60	76	S	C	43	42	C	C	99	74	C	.	.	.	.	.	.	.	.
1	264098035	ENSSSCG00000005312	T	C	99	91	Y	C	99	22	C	C	99	70	C	.	.	.	.	.	.	.	.
1	264179626	ENSSSCG00000005318	G	A	61	16	R	A	69	6	R	A	99	11	R	.	.	.	.	.	.	.	.
1	264184952	ENSSSCG00000005319	A	.	.	.	.	.	.	.	.	.	.	.	.	G	99	11	R	G	87	15	G
1	264194461	ENSSSCG00000005320	A	.	.	.	.	.	.	.	.	.	.	.	.	G	63	8	R	G	48	11	R
1	264628420	ENSSSCG00000005339	C	T	99	77	Y	T	99	32	Y	T	99	62	Y	.	.	.	.	.	.	.	.
1	266117688	ENSSSCG00000005347	C	.	.	.	.	.	.	.	.	.	.	.	.	T	83	8	Y	T	99	21	Y
1	266124751	ENSSSCG00000005347	A	.	.	.	.	.	.	.	.	.	.	.	.	G	99	16	R	G	99	25	R
1	266093485	ENSSSCG00000005349	A	.	.	.	.	.	.	.	.	.	.	.	.	G	99	17	R	G	99	13	R
1	266098586	ENSSSCG00000005349	A	.	.	.	.	.	.	.	.	.	.	.	.	G	99	30	R	G	99	19	G
1	266101440	ENSSSCG00000005349	C	.	.	.	.	.	.	.	.	.	.	.	.	A	99	38	M	A	99	43	A
1	267602504	ENSSSCG00000005366;ENSSSCG00000023010	A	.	.	.	.	.	.	.	.	.	.	.	.	G	51	9	G	G	99	10	R
1	267607308	ENSSSCG00000005366;ENSSSCG00000023010	G	.	.	.	.	.	.	.	.	.	.	.	.	A	67	5	R	A	99	23	R
1	267547782	ENSSSCG00000005367;ENSSSCG00000023010	G	.	.	.	.	.	.	.	.	.	.	.	.	T	99	66	K	T	91	86	K
1	267547998	ENSSSCG00000005367;ENSSSCG00000023010	C	.	.	.	.	.	.	.	.	.	.	.	.	G	65	32	S	G	87	49	S
1	267548797	ENSSSCG00000005367;ENSSSCG00000023010	G	.	.	.	.	.	.	.	.	.	.	.	.	C	30	10	S	C	95	15	S
1	267875609	ENSSSCG00000005370	T	.	.	.	.	.	.	.	.	.	.	.	.	C	84	8	Y	C	39	10	Y
1	267876303	ENSSSCG00000005370	A	.	.	.	.	.	.	.	.	.	.	.	.	G	99	9	R	G	87	27	R
1	268060868	ENSSSCG00000005373	C	.	.	.	.	.	.	.	.	.	.	.	.	T	99	16	Y	T	99	25	Y
1	268074704	ENSSSCG00000005373	A	.	.	.	.	.	.	.	.	.	.	.	.	G	99	21	R	G	99	34	R
1	268097808	ENSSSCG00000005374	A	.	.	.	.	.	.	.	.	.	.	.	.	G	99	8	R	G	28	17	R
1	269148845	ENSSSCG00000005382	G	.	.	.	.	.	.	.	.	.	.	.	.	A	33	7	R	A	99	33	R
1	270108483	ENSSSCG00000005387	G	.	.	.	.	.	.	.	.	.	.	.	.	A	80	11	R	A	99	37	R
1	274631750	ENSSSCG00000005403	G	.	.	.	.	.	.	.	.	.	.	.	.	A	99	10	R	A	99	19	R
1	278945995	ENSSSCG00000005436	T	.	.	.	.	.	.	.	.	.	.	.	.	C	65	11	Y	C	89	37	Y
1	283059870	ENSSSCG00000005459	T	.	.	.	.	.	.	.	.	.	.	.	.	C	97	29	Y	C	99	46	Y
1	283065027	ENSSSCG00000005459	C	.	.	.	.	.	.	.	.	.	.	.	.	T	99	13	Y	T	99	33	Y
1	283070587	ENSSSCG00000005459	G	.	.	.	.	.	.	.	.	.	.	.	.	A	99	12	R	A	99	15	R
1	283265911	ENSSSCG00000005462	A	C	99	76	C	C	51	10	C	C	99	30	C	.	.	.	.	.	.	.	.
1	283609029	ENSSSCG00000005465	A	.	.	.	.	.	.	.	.	.	.	.	.	G	45	8	G	G	45	8	G
1	283609267	ENSSSCG00000005465	T	.	.	.	.	.	.	.	.	.	.	.	.	C	57	10	C	C	57	10	C
1	283610349	ENSSSCG00000005465	T	.	.	.	.	.	.	.	.	.	.	.	.	C	99	21	Y	C	27	6	Y
1	283610390	ENSSSCG00000005465	A	.	.	.	.	.	.	.	.	.	.	.	.	G	89	19	R	G	31	5	R
1	283712550	ENSSSCG00000005465	G	.	.	.	.	.	.	.	.	.	.	.	.	C	27	5	C	C	25	5	S
1	284995491	ENSSSCG00000005481	A	.	.	.	.	.	.	.	.	.	.	.	.	G	99	44	R	G	99	42	R
1	285935874	ENSSSCG00000005487;ENSSSCG00000023894	G	.	.	.	.	.	.	.	.	.	.	.	.	A	57	5	R	A	49	41	R
1	286043127	ENSSSCG00000005487;ENSSSCG00000023894	A	.	.	.	.	.	.	.	.	.	.	.	.	G	99	41	R	G	87	39	R
1	286045176	ENSSSCG00000005487;ENSSSCG00000023894	T	.	.	.	.	.	.	.	.	.	.	.	.	C	99	21	Y	C	99	36	Y
1	286064570	ENSSSCG00000005487;ENSSSCG00000023894	C	.	.	.	.	.	.	.	.	.	.	.	.	T	99	16	Y	T	99	32	Y
1	286250899	ENSSSCG00000005491	G	T	63	40	T	T	50	9	K	T	99	29	K	.	.	.	.	.	.	.	.
1	299461743	ENSSSCG00000005594;ENSSSCG00000005595	A	.	.	.	.	.	.	.	.	.	.	.	.	G	27	5	G	G	78	14	R
1	302105766	ENSSSCG00000005615	C	.	.	.	.	.	.	.	.	.	.	.	.	T	53	16	Y	T	51	9	T
1	302236907	ENSSSCG00000005625	C	.	.	.	.	.	.	.	.	.	.	.	.	T	99	18	Y	T	69	15	Y
1	302237297	ENSSSCG00000005625	G	A	33	6	A	A	66	5	R	A	20	5	R	.	.	.	.	.	.	.	.
1	302256939	ENSSSCG00000005625	G	.	.	.	.	.	.	.	.	.	.	.	.	A	99	9	R	A	33	6	A
1	302349669	ENSSSCG00000005631	A	.	.	.	.	.	.	.	.	.	.	.	.	G	65	5	R	G	64	5	R
1	302350241	ENSSSCG00000005631	A	.	.	.	.	.	.	.	.	.	.	.	.	G	55	62	R	G	99	38	R
1	302351077	ENSSSCG00000005631	A	.	.	.	.	.	.	.	.	.	.	.	.	T	81	10	W	T	99	18	W
1	302351248	ENSSSCG00000005631	C	.	.	.	.	.	.	.	.	.	.	.	.	T	33	13	Y	T	99	21	Y
1	302351801	ENSSSCG00000005631	C	.	.	.	.	.	.	.	.	.	.	.	.	T	99	36	Y	T	94	17	Y
1	302352044	ENSSSCG00000005631	T	.	.	.	.	.	.	.	.	.	.	.	.	C	99	20	Y	C	99	28	Y
1	302354876	ENSSSCG00000005631	G	.	.	.	.	.	.	.	.	.	.	.	.	A	37	9	R	A	99	9	R
1	302566994	ENSSSCG00000005636	T	.	.	.	.	.	.	.	.	.	.	.	.	C	83	12	Y	C	39	8	C
1	302605088	ENSSSCG00000005638	C	.	.	.	.	.	.	.	.	.	.	.	.	A	99	71	M	A	84	8	M
1	302619983	ENSSSCG00000005640	G	.	.	.	.	.	.	.	.	.	.	.	.	A	99	44	R	A	99	45	R
1	302736690	ENSSSCG00000005645	C	.	.	.	.	.	.	.	.	.	.	.	.	T	68	28	Y	T	99	39	Y
1	302736922	ENSSSCG00000005645	C	.	.	.	.	.	.	.	.	.	.	.	.	G	27	6	G	G	87	23	S
1	302805534	ENSSSCG00000005645	A	.	.	.	.	.	.	.	.	.	.	.	.	G	57	10	G	G	75	7	R
1	302747500	ENSSSCG00000005645;ENSSSCG00000005646	G	.	.	.	.	.	.	.	.	.	.	.	.	A	99	39	R	A	99	46	R
1	302758430	ENSSSCG00000005645;ENSSSCG00000005646	A	.	.	.	.	.	.	.	.	.	.	.	.	G	99	73	G	G	99	83	R
1	302758617	ENSSSCG00000005645;ENSSSCG00000005646	C	.	.	.	.	.	.	.	.	.	.	.	.	T	99	35	T	T	99	57	Y
1	302758777	ENSSSCG00000005645;ENSSSCG00000005646	G	.	.	.	.	.	.	.	.	.	.	.	.	A	99	48	R	A	99	56	R
1	302758859	ENSSSCG00000005645;ENSSSCG00000005646	G	.	.	.	.	.	.	.	.	.	.	.	.	A	99	38	R	A	99	41	R
1	302768388	ENSSSCG00000005645;ENSSSCG00000005648	T	.	.	.	.	.	.	.	.	.	.	.	.	C	99	28	C	C	99	31	Y
1	302905082	ENSSSCG00000005651	G	.	.	.	.	.	.	.	.	.	.	.	.	C	33	7	C	C	51	9	C
1	302929861	ENSSSCG00000005652	C	.	.	.	.	.	.	.	.	.	.	.	.	T	51	9	T	T	81	10	Y
1	302939298	ENSSSCG00000005652	T	.	.	.	.	.	.	.	.	.	.	.	.	C	51	9	C	C	99	17	Y
1	302940877	ENSSSCG00000005652	C	.	.	.	.	.	.	.	.	.	.	.	.	A	99	24	M	A	27	6	A
1	303006834	ENSSSCG00000005654	T	.	.	.	.	.	.	.	.	.	.	.	.	C	99	62	Y	C	99	63	Y
1	303037570	ENSSSCG00000005655	A	.	.	.	.	.	.	.	.	.	.	.	.	G	52	8	R	G	48	10	R
1	303037598	ENSSSCG00000005655	A	.	.	.	.	.	.	.	.	.	.	.	.	G	51	9	G	G	52	9	R
1	303087791	ENSSSCG00000005656	A	.	.	.	.	.	.	.	.	.	.	.	.	G	99	55	R	G	99	69	R
1	303114911	ENSSSCG00000005659	A	.	.	.	.	.	.	.	.	.	.	.	.	G	99	26	R	G	86	11	R
1	303128329	ENSSSCG00000005659	G	.	.	.	.	.	.	.	.	.	.	.	.	A	99	14	R	A	77	11	R
1	303128429	ENSSSCG00000005659	T	.	.	.	.	.	.	.	.	.	.	.	.	C	99	14	Y	C	80	16	Y
1	303162326	ENSSSCG00000005660	C	.	.	.	.	.	.	.	.	.	.	.	.	T	99	8	Y	T	99	21	Y
1	303171955	ENSSSCG00000005661	T	.	.	.	.	.	.	.	.	.	.	.	.	C	57	11	C	C	99	12	Y
1	303173471	ENSSSCG00000005661;ENSSSCG00000005662	A	.	.	.	.	.	.	.	.	.	.	.	.	G	75	13	G	G	99	22	R
1	303173503	ENSSSCG00000005661;ENSSSCG00000005662	C	.	.	.	.	.	.	.	.	.	.	.	.	T	99	40	T	T	99	50	Y
1	303173986	ENSSSCG00000005661;ENSSSCG00000005662	G	.	.	.	.	.	.	.	.	.	.	.	.	A	99	25	A	A	80	13	R
1	303178619	ENSSSCG00000005662	T	.	.	.	.	.	.	.	.	.	.	.	.	C	75	13	C	C	99	15	Y
1	303246326	ENSSSCG00000005664	T	.	.	.	.	.	.	.	.	.	.	.	.	C	63	12	C	C	39	7	C
1	303253846	ENSSSCG00000005664	A	G	63	11	G	G	42	5	R	G	47	12	R	.	.	.	.	.	.	.	.
1	303254472	ENSSSCG00000005664	G	.	.	.	.	.	.	.	.	.	.	.	.	A	89	22	R	A	99	22	R
1	303254490	ENSSSCG00000005664	G	.	.	.	.	.	.	.	.	.	.	.	.	A	99	26	A	A	99	21	R
1	303268393	ENSSSCG00000005665	C	.	.	.	.	.	.	.	.	.	.	.	.	T	39	7	T	T	66	6	Y
1	303323972	ENSSSCG00000005667	C	.	.	.	.	.	.	.	.	.	.	.	.	T	33	6	T	T	41	12	Y
1	303324047	ENSSSCG00000005667	T	.	.	.	.	.	.	.	.	.	.	.	.	C	27	5	C	C	85	12	Y
1	303328542	ENSSSCG00000005667	C	.	.	.	.	.	.	.	.	.	.	.	.	A	81	14	A	A	99	13	M
1	303330528	ENSSSCG00000005668	C	.	.	.	.	.	.	.	.	.	.	.	.	T	99	19	T	T	99	25	Y
1	303336189	ENSSSCG00000005668	C	.	.	.	.	.	.	.	.	.	.	.	.	T	99	24	T	T	99	21	Y
1	303336216	ENSSSCG00000005668	T	.	.	.	.	.	.	.	.	.	.	.	.	C	99	26	C	C	99	22	Y
1	303336582	ENSSSCG00000005668	G	.	.	.	.	.	.	.	.	.	.	.	.	A	99	26	A	A	99	28	R
1	303343973	ENSSSCG00000005668	G	.	.	.	.	.	.	.	.	.	.	.	.	A	99	16	R	A	99	28	R
1	303344036	ENSSSCG00000005668	T	.	.	.	.	.	.	.	.	.	.	.	.	C	99	14	Y	C	99	26	Y
1	303344057	ENSSSCG00000005668	G	.	.	.	.	.	.	.	.	.	.	.	.	A	99	15	R	A	98	31	R
1	303355499	ENSSSCG00000005669	G	.	.	.	.	.	.	.	.	.	.	.	.	A	99	12	R	A	39	6	R
1	303357864	ENSSSCG00000005669	C	.	.	.	.	.	.	.	.	.	.	.	.	T	87	12	Y	T	90	13	Y
1	303358342	ENSSSCG00000005669	A	.	.	.	.	.	.	.	.	.	.	.	.	G	45	8	G	G	51	9	G
1	303365277	ENSSSCG00000005669	G	.	.	.	.	.	.	.	.	.	.	.	.	A	27	5	A	A	50	8	R
1	303366752	ENSSSCG00000005669	T	.	.	.	.	.	.	.	.	.	.	.	.	G	75	13	G	G	56	7	K
1	303379198	ENSSSCG00000005669	G	.	.	.	.	.	.	.	.	.	.	.	.	A	60	16	R	A	59	6	R
1	303379694	ENSSSCG00000005669	T	.	.	.	.	.	.	.	.	.	.	.	.	C	99	22	C	C	89	17	Y
1	303399633	ENSSSCG00000005670	T	.	.	.	.	.	.	.	.	.	.	.	.	C	39	7	C	C	37	6	Y
1	303399673	ENSSSCG00000005670	C	.	.	.	.	.	.	.	.	.	.	.	.	T	33	6	T	T	53	6	Y
1	303418136	ENSSSCG00000005672	A	.	.	.	.	.	.	.	.	.	.	.	.	T	99	22	W	T	99	30	W
1	303446152	ENSSSCG00000005672	A	.	.	.	.	.	.	.	.	.	.	.	.	G	33	6	G	G	79	9	R
1	303446425	ENSSSCG00000005672	T	.	.	.	.	.	.	.	.	.	.	.	.	C	99	37	C	C	99	44	Y
1	303687398	ENSSSCG00000005678	C	.	.	.	.	.	.	.	.	.	.	.	.	T	51	9	T	T	45	8	T
1	303700422	ENSSSCG00000005679	A	.	.	.	.	.	.	.	.	.	.	.	.	G	64	5	R	G	99	22	R
1	303964982	ENSSSCG00000005689	A	.	.	.	.	.	.	.	.	.	.	.	.	G	27	5	G	G	57	12	R
1	303973091	ENSSSCG00000005689	C	.	.	.	.	.	.	.	.	.	.	.	.	A	69	10	M	A	99	51	M
1	304016546	ENSSSCG00000005689	G	.	.	.	.	.	.	.	.	.	.	.	.	A	99	23	R	A	99	31	R
1	305167775	ENSSSCG00000005711	T	.	.	.	.	.	.	.	.	.	.	.	.	C	99	13	Y	C	64	7	Y
1	305417560	ENSSSCG00000005715	C	.	.	.	.	.	.	.	.	.	.	.	.	T	33	6	T	T	63	11	T
1	305417809	ENSSSCG00000005715	G	.	.	.	.	.	.	.	.	.	.	.	.	A	92	14	R	A	95	12	R
1	305424192	ENSSSCG00000005715	A	.	.	.	.	.	.	.	.	.	.	.	.	T	57	10	T	T	27	5	T
1	305424276	ENSSSCG00000005715	A	.	.	.	.	.	.	.	.	.	.	.	.	G	51	9	G	G	51	9	G
1	305437278	ENSSSCG00000005715	C	.	.	.	.	.	.	.	.	.	.	.	.	T	22	6	Y	T	34	8	Y
1	305448750	ENSSSCG00000005716	C	.	.	.	.	.	.	.	.	.	.	.	.	T	62	6	Y	T	96	9	Y
1	305452246	ENSSSCG00000005716	C	.	.	.	.	.	.	.	.	.	.	.	.	G	79	13	S	G	89	9	S
1	305457418	ENSSSCG00000005717	A	C	39	19	C	C	25	11	M	C	81	15	C	.	.	.	.	.	.	.	.
1	305462068	ENSSSCG00000005717	C	.	.	.	.	.	.	.	.	.	.	.	.	T	69	26	Y	T	99	42	Y
1	305502574	ENSSSCG00000005719	A	G	99	67	G	G	99	25	G	G	99	31	G	.	.	.	.	.	.	.	.
1	305502692	ENSSSCG00000005719	A	G	99	62	G	G	99	34	G	G	99	36	G	.	.	.	.	.	.	.	.
1	305503356	ENSSSCG00000005719	A	G	81	17	G	G	27	6	G	G	51	11	G	.	.	.	.	.	.	.	.
1	305511904	ENSSSCG00000005719	G	.	.	.	.	.	.	.	.	.	.	.	.	A	99	15	R	A	99	32	R
1	305520341	ENSSSCG00000005719	T	.	.	.	.	.	.	.	.	.	.	.	.	G	80	12	K	G	67	18	K
1	305544303	ENSSSCG00000005719	A	.	.	.	.	.	.	.	.	.	.	.	.	G	99	35	R	G	99	41	R
1	305559453	ENSSSCG00000005719	C	.	.	.	.	.	.	.	.	.	.	.	.	T	99	14	Y	T	99	26	Y
1	305734088	ENSSSCG00000005720	C	.	.	.	.	.	.	.	.	.	.	.	.	G	28	43	S	G	48	11	S
1	306154969	ENSSSCG00000005724	C	.	.	.	.	.	.	.	.	.	.	.	.	T	99	62	T	T	99	89	Y
1	306155135	ENSSSCG00000005724	T	.	.	.	.	.	.	.	.	.	.	.	.	C	30	19	Y	C	99	87	Y
1	306795732	ENSSSCG00000005733;ENSSSCG00000005739	G	.	.	.	.	.	.	.	.	.	.	.	.	A	27	7	A	A	33	7	A
1	306856484	ENSSSCG00000005737;ENSSSCG00000005739	A	.	.	.	.	.	.	.	.	.	.	.	.	G	91	10	R	G	98	15	R
1	306707035	ENSSSCG00000005738	T	.	.	.	.	.	.	.	.	.	.	.	.	C	75	13	C	C	99	19	C
1	306730280	ENSSSCG00000005739	G	.	.	.	.	.	.	.	.	.	.	.	.	C	99	41	S	C	40	23	S
1	306730317	ENSSSCG00000005739	G	.	.	.	.	.	.	.	.	.	.	.	.	A	99	48	A	A	99	33	R
1	306927420	ENSSSCG00000005739	C	.	.	.	.	.	.	.	.	.	.	.	.	G	99	22	G	G	57	10	G
1	307276351	ENSSSCG00000005743	G	.	.	.	.	.	.	.	.	.	.	.	.	A	75	13	A	A	37	13	R
1	307277197	ENSSSCG00000005743	G	.	.	.	.	.	.	.	.	.	.	.	.	C	99	21	C	C	75	16	S
1	307277299	ENSSSCG00000005743	G	.	.	.	.	.	.	.	.	.	.	.	.	A	99	21	A	A	99	24	R
1	307277973	ENSSSCG00000005743	G	.	.	.	.	.	.	.	.	.	.	.	.	A	49	11	R	A	99	17	R
1	307278015	ENSSSCG00000005743	G	.	.	.	.	.	.	.	.	.	.	.	.	T	57	10	T	T	99	22	T
1	307288776	ENSSSCG00000005743	T	.	.	.	.	.	.	.	.	.	.	.	.	G	48	14	K	G	99	22	K
1	307302173	ENSSSCG00000005743	T	.	.	.	.	.	.	.	.	.	.	.	.	G	72	5	K	G	99	9	K
1	307307500	ENSSSCG00000005743	G	.	.	.	.	.	.	.	.	.	.	.	.	A	27	5	A	A	96	9	R
1	307478270	ENSSSCG00000005749	T	.	.	.	.	.	.	.	.	.	.	.	.	A	75	9	W	A	89	10	W
1	307478623	ENSSSCG00000005749	G	.	.	.	.	.	.	.	.	.	.	.	.	A	99	9	R	A	88	14	R
1	308637503	ENSSSCG00000005759	G	.	.	.	.	.	.	.	.	.	.	.	.	A	27	7	A	A	63	6	R
1	309592001	ENSSSCG00000005768	A	.	.	.	.	.	.	.	.	.	.	.	.	G	75	13	G	G	99	54	R
1	310140215	ENSSSCG00000005777	C	A	46	11	M	A	81	14	A	A	61	19	M	.	.	.	.	.	.	.	.
1	311561401	ENSSSCG00000005787	C	T	99	22	Y	T	63	6	Y	T	99	29	Y	.	.	.	.	.	.	.	.
1	313732572	ENSSSCG00000005828	G	.	.	.	.	.	.	.	.	.	.	.	.	A	93	16	A	A	99	20	R
1	313732871	ENSSSCG00000005828	T	.	.	.	.	.	.	.	.	.	.	.	.	C	99	47	C	C	99	35	Y
1	313736870	ENSSSCG00000005828	G	.	.	.	.	.	.	.	.	.	.	.	.	A	99	85	R	A	99	34	R
1	313809514	ENSSSCG00000005832	T	.	.	.	.	.	.	.	.	.	.	.	.	A	31	33	A	A	77	23	W
1	313809807	ENSSSCG00000005832	A	.	.	.	.	.	.	.	.	.	.	.	.	G	99	43	G	G	81	20	R
1	313810129	ENSSSCG00000005832	G	.	.	.	.	.	.	.	.	.	.	.	.	A	99	24	R	A	99	12	R
1	313810157	ENSSSCG00000005832	T	.	.	.	.	.	.	.	.	.	.	.	.	C	99	22	C	C	99	11	Y
1	313811652	ENSSSCG00000005832	C	.	.	.	.	.	.	.	.	.	.	.	.	T	99	38	Y	T	99	17	Y
1	313811723	ENSSSCG00000005832	A	.	.	.	.	.	.	.	.	.	.	.	.	G	99	24	G	G	48	18	R
1	313808612	ENSSSCG00000005833	T	.	.	.	.	.	.	.	.	.	.	.	.	C	99	41	C	C	99	45	Y
1	313855706	ENSSSCG00000005837	A	.	.	.	.	.	.	.	.	.	.	.	.	G	57	10	G	G	99	15	R
1	313772098	ENSSSCG00000005838	T	.	.	.	.	.	.	.	.	.	.	.	.	C	99	49	C	C	99	44	Y
1	313772607	ENSSSCG00000005838	G	.	.	.	.	.	.	.	.	.	.	.	.	A	94	37	R	A	99	33	R
1	313772704	ENSSSCG00000005838	T	.	.	.	.	.	.	.	.	.	.	.	.	C	99	29	C	C	99	25	Y
1	313778058	ENSSSCG00000005838	C	.	.	.	.	.	.	.	.	.	.	.	.	T	99	51	Y	T	99	33	Y
1	313781793	ENSSSCG00000005838	A	.	.	.	.	.	.	.	.	.	.	.	.	G	81	15	G	G	99	13	R
1	313924393	ENSSSCG00000005841	T	.	.	.	.	.	.	.	.	.	.	.	.	C	99	83	C	C	99	42	Y
1	313924842	ENSSSCG00000005841	T	.	.	.	.	.	.	.	.	.	.	.	.	C	99	71	C	C	52	48	Y
1	314117470	ENSSSCG00000005846	C	.	.	.	.	.	.	.	.	.	.	.	.	A	99	66	A	A	90	61	M
1	314117665	ENSSSCG00000005846	A	.	.	.	.	.	.	.	.	.	.	.	.	G	99	84	G	G	99	56	R
1	314117838	ENSSSCG00000005846	C	.	.	.	.	.	.	.	.	.	.	.	.	T	99	100	T	T	99	61	Y
1	314118114	ENSSSCG00000005846	G	.	.	.	.	.	.	.	.	.	.	.	.	C	99	99	C	C	99	61	S
1	314118470	ENSSSCG00000005846	G	.	.	.	.	.	.	.	.	.	.	.	.	A	57	11	A	A	99	18	R
1	314118688	ENSSSCG00000005846	G	.	.	.	.	.	.	.	.	.	.	.	.	T	99	39	T	T	99	19	K
1	314118936	ENSSSCG00000005846	G	.	.	.	.	.	.	.	.	.	.	.	.	A	99	19	A	A	99	12	R
1	314119188	ENSSSCG00000005846	A	.	.	.	.	.	.	.	.	.	.	.	.	G	75	13	G	G	76	12	R
1	314124408	ENSSSCG00000005846	C	.	.	.	.	.	.	.	.	.	.	.	.	T	99	72	T	T	99	69	Y
1	314137747	ENSSSCG00000005849	C	.	.	.	.	.	.	.	.	.	.	.	.	T	99	32	T	T	99	17	Y
1	314054928	ENSSSCG00000005855	C	.	.	.	.	.	.	.	.	.	.	.	.	T	27	5	T	T	27	5	T
1	314056246	ENSSSCG00000005855	G	.	.	.	.	.	.	.	.	.	.	.	.	A	99	19	A	A	57	10	R
1	314157383	ENSSSCG00000005859	A	.	.	.	.	.	.	.	.	.	.	.	.	G	99	32	G	G	99	17	R
1	314160235	ENSSSCG00000005859	T	.	.	.	.	.	.	.	.	.	.	.	.	C	99	29	C	C	28	15	Y
1	144621750	ENSSSCG00000020666	T	G	59	12	K	G	37	10	K	G	28	11	K	.	.	.	.	.	.	.	.
1	144622283	ENSSSCG00000020666	A	.	.	.	.	.	.	.	.	.	.	.	.	G	97	12	R	G	99	20	R
1	144622552	ENSSSCG00000020666	A	.	.	.	.	.	.	.	.	.	.	.	.	G	34	14	R	G	99	22	R
1	283170900	ENSSSCG00000021386	G	.	.	.	.	.	.	.	.	.	.	.	.	C	99	16	S	C	45	9	C
1	283172545	ENSSSCG00000021386	G	.	.	.	.	.	.	.	.	.	.	.	.	A	99	20	R	A	99	19	A
1	33254303	ENSSSCG00000021443	C	.	.	.	.	.	.	.	.	.	.	.	.	T	99	25	T	T	99	41	Y
1	33255158	ENSSSCG00000021443	A	.	.	.	.	.	.	.	.	.	.	.	.	T	27	22	T	T	99	70	W
1	118993721	ENSSSCG00000021588	C	.	.	.	.	.	.	.	.	.	.	.	.	G	51	10	G	G	92	41	S
1	118997548	ENSSSCG00000021588	T	.	.	.	.	.	.	.	.	.	.	.	.	C	81	15	C	C	91	16	Y
1	119010726	ENSSSCG00000021588	C	.	.	.	.	.	.	.	.	.	.	.	.	T	99	20	T	T	99	32	Y
1	208238210	ENSSSCG00000022299	C	.	.	.	.	.	.	.	.	.	.	.	.	A	51	9	A	A	99	20	A
1	302576734	ENSSSCG00000022655	A	G	27	5	G	G	51	11	G	G	51	10	G	.	.	.	.	.	.	.	.
1	302578073	ENSSSCG00000022655	T	.	.	.	.	.	.	.	.	.	.	.	.	G	99	43	K	G	99	31	K
1	302579032	ENSSSCG00000022655	G	C	33	6	C	C	93	10	S	C	84	10	S	.	.	.	.	.	.	.	.
1	267559130	ENSSSCG00000023010	G	.	.	.	.	.	.	.	.	.	.	.	.	A	79	7	R	A	99	14	R
1	143103048	ENSSSCG00000023164	T	A	99	64	W	A	99	17	W	A	99	27	W	.	.	.	.	.	.	.	.
1	306985937	ENSSSCG00000023173	C	.	.	.	.	.	.	.	.	.	.	.	.	T	99	24	Y	T	99	30	Y
1	306986024	ENSSSCG00000023173	T	.	.	.	.	.	.	.	.	.	.	.	.	C	20	9	Y	C	79	11	Y
1	308201116	ENSSSCG00000023333	T	.	.	.	.	.	.	.	.	.	.	.	.	C	99	44	C	C	99	17	Y
1	182187763	ENSSSCG00000023980	A	.	.	.	.	.	.	.	.	.	.	.	.	G	82	10	R	G	81	14	G
1	141718437	ENSSSCG00000023996;ENSSSCG00000028089	C	.	.	.	.	.	.	.	.	.	.	.	.	T	99	9	Y	T	99	45	Y
1	307042902	ENSSSCG00000024166	A	.	.	.	.	.	.	.	.	.	.	.	.	G	99	22	R	G	99	33	R
1	307043159	ENSSSCG00000024166	G	.	.	.	.	.	.	.	.	.	.	.	.	A	99	25	R	A	99	37	R
1	142596051	ENSSSCG00000024263	G	.	.	.	.	.	.	.	.	.	.	.	.	A	99	15	R	A	99	17	R
1	13570098	ENSSSCG00000024361	G	.	.	.	.	.	.	.	.	.	.	.	.	A	39	7	A	A	57	10	A
1	11476919	ENSSSCG00000024528	T	.	.	.	.	.	.	.	.	.	.	.	.	C	45	8	C	C	33	6	C
1	307537628	ENSSSCG00000024912	C	.	.	.	.	.	.	.	.	.	.	.	.	T	99	29	T	T	99	48	T
1	307549184	ENSSSCG00000024912	G	.	.	.	.	.	.	.	.	.	.	.	.	A	99	56	R	A	99	61	R
1	311682696	ENSSSCG00000024959	C	.	.	.	.	.	.	.	.	.	.	.	.	T	54	8	Y	T	34	5	Y
1	129166330	ENSSSCG00000024983	C	.	.	.	.	.	.	.	.	.	.	.	.	T	73	14	Y	T	49	22	T
1	248537816	ENSSSCG00000025033	C	.	.	.	.	.	.	.	.	.	.	.	.	T	85	8	Y	T	62	5	Y
1	14741548	ENSSSCG00000025352	T	.	.	.	.	.	.	.	.	.	.	.	.	C	27	5	C	C	44	15	Y
1	14743865	ENSSSCG00000025352	A	.	.	.	.	.	.	.	.	.	.	.	.	G	27	5	G	G	99	26	R
1	14743921	ENSSSCG00000025352	T	.	.	.	.	.	.	.	.	.	.	.	.	C	33	6	C	C	99	26	C
1	14744128	ENSSSCG00000025352	G	.	.	.	.	.	.	.	.	.	.	.	.	A	45	8	A	A	99	19	R
1	63663540	ENSSSCG00000025426	G	.	.	.	.	.	.	.	.	.	.	.	.	A	45	8	A	A	33	6	A
1	159396774	ENSSSCG00000026006	G	.	.	.	.	.	.	.	.	.	.	.	.	A	36	6	R	A	99	38	R
1	159397752	ENSSSCG00000026006	T	.	.	.	.	.	.	.	.	.	.	.	.	C	54	5	Y	C	99	28	C
1	159399362	ENSSSCG00000026006	A	.	.	.	.	.	.	.	.	.	.	.	.	G	33	6	G	G	51	10	G
1	159400028	ENSSSCG00000026006	T	.	.	.	.	.	.	.	.	.	.	.	.	C	57	8	Y	C	99	22	C
1	159450284	ENSSSCG00000026006	T	.	.	.	.	.	.	.	.	.	.	.	.	C	27	6	Y	C	39	7	C
1	159450641	ENSSSCG00000026006	T	.	.	.	.	.	.	.	.	.	.	.	.	C	61	10	Y	C	61	8	Y
1	159485503	ENSSSCG00000026006	C	.	.	.	.	.	.	.	.	.	.	.	.	T	30	5	Y	T	33	7	T
1	137481014	ENSSSCG00000026096	T	C	99	98	C	C	99	34	C	C	99	54	C	.	.	.	.	.	.	.	.
1	284184486	ENSSSCG00000026194	C	.	.	.	.	.	.	.	.	.	.	.	.	A	41	11	M	A	58	17	M
1	284184610	ENSSSCG00000026194	A	.	.	.	.	.	.	.	.	.	.	.	.	G	57	11	G	G	91	22	R
1	284184937	ENSSSCG00000026194	T	.	.	.	.	.	.	.	.	.	.	.	.	C	39	7	C	C	39	24	Y
1	284185787	ENSSSCG00000026194	G	.	.	.	.	.	.	.	.	.	.	.	.	A	27	5	A	A	99	16	R
1	227036268	ENSSSCG00000026955	T	.	.	.	.	.	.	.	.	.	.	.	.	C	55	36	Y	C	88	65	Y
1	227043671	ENSSSCG00000026955	T	.	.	.	.	.	.	.	.	.	.	.	.	C	66	7	Y	C	45	8	C
1	208389645	ENSSSCG00000027270	T	.	.	.	.	.	.	.	.	.	.	.	.	C	93	21	C	C	81	14	C
1	202433678	ENSSSCG00000027537	A	.	.	.	.	.	.	.	.	.	.	.	.	G	45	8	G	G	81	15	G
1	202433795	ENSSSCG00000027537	C	.	.	.	.	.	.	.	.	.	.	.	.	A	64	6	M	A	33	6	A
1	202434441	ENSSSCG00000027537	C	.	.	.	.	.	.	.	.	.	.	.	.	T	33	6	T	T	69	13	T
1	201891593	ENSSSCG00000028092	G	.	.	.	.	.	.	.	.	.	.	.	.	C	74	19	S	C	99	22	S
1	201891649	ENSSSCG00000028092	G	.	.	.	.	.	.	.	.	.	.	.	.	T	99	19	K	T	69	12	T
1	201893816	ENSSSCG00000028092	T	.	.	.	.	.	.	.	.	.	.	.	.	C	93	15	Y	C	99	19	C
1	305270613	ENSSSCG00000028172	C	.	.	.	.	.	.	.	.	.	.	.	.	T	99	37	Y	T	99	38	Y
1	305270801	ENSSSCG00000028172	T	.	.	.	.	.	.	.	.	.	.	.	.	C	99	40	Y	C	99	40	Y
1	305270815	ENSSSCG00000028172	T	.	.	.	.	.	.	.	.	.	.	.	.	C	99	36	Y	C	99	42	Y
1	305271914	ENSSSCG00000028172	C	.	.	.	.	.	.	.	.	.	.	.	.	A	99	35	M	A	99	25	M
1	224955698	ENSSSCG00000028884	A	.	.	.	.	.	.	.	.	.	.	.	.	G	99	16	R	G	99	25	G
1	224956372	ENSSSCG00000028884	T	.	.	.	.	.	.	.	.	.	.	.	.	C	39	9	Y	C	39	7	C
1	308216819	ENSSSCG00000029414	G	.	.	.	.	.	.	.	.	.	.	.	.	A	73	39	A	A	99	59	R
1	308218284	ENSSSCG00000029414	T	.	.	.	.	.	.	.	.	.	.	.	.	C	99	32	C	C	99	23	Y
1	308218444	ENSSSCG00000029414	T	.	.	.	.	.	.	.	.	.	.	.	.	C	99	30	C	C	79	26	Y
1	308218923	ENSSSCG00000029414	C	.	.	.	.	.	.	.	.	.	.	.	.	T	39	7	T	T	99	11	Y
1	308219876	ENSSSCG00000029414	G	.	.	.	.	.	.	.	.	.	.	.	.	A	87	15	A	A	68	24	R
1	308316487	ENSSSCG00000029715	G	T	81	15	T	T	67	7	K	T	89	6	K	.	.	.	.	.	.	.	.
1	308316499	ENSSSCG00000029715	A	C	81	15	C	C	69	6	M	C	33	5	M	.	.	.	.	.	.	.	.
1	9475609	ENSSSCG00000029876	T	.	.	.	.	.	.	.	.	.	.	.	.	C	87	15	C	C	81	15	C
1	9476126	ENSSSCG00000029876	A	G	99	38	G	G	99	17	R	G	79	14	R	.	.	.	.	.	.	.	.
1	9485457	ENSSSCG00000029876	A	.	.	.	.	.	.	.	.	.	.	.	.	G	87	16	G	G	69	12	G
1	154776271	ENSSSCG00000030487	A	.	.	.	.	.	.	.	.	.	.	.	.	G	64	6	R	G	72	12	R
1	146309756	ENSSSCG00000030580	G	.	.	.	.	.	.	.	.	.	.	.	.	A	27	5	A	A	99	8	R
1	146312401	ENSSSCG00000030580	C	.	.	.	.	.	.	.	.	.	.	.	.	G	21	5	G	G	64	7	S
1	307039425	intergenic	A	.	.	.	.	.	.	.	.	.	.	.	.	G	63	11	G	G	99	23	R
1	202282307	intergenic	A	.	.	.	.	.	.	.	.	.	.	.	.	C	93	16	C	C	45	9	C
1	178852081	intergenic	T	.	.	.	.	.	.	.	.	.	.	.	.	C	61	11	Y	C	99	94	C
1	3307136	intergenic	G	A	99	90	A	A	99	71	R	A	99	79	R	.	.	.	.	.	.	.	.
1	64115533	intergenic	G	.	.	.	.	.	.	.	.	.	.	.	.	A	99	14	R	A	99	25	R
1	306154608	intergenic	G	A	99	37	R	A	91	19	R	A	70	23	R	.	.	.	.	.	.	.	.
1	267871481	intergenic	A	.	.	.	.	.	.	.	.	.	.	.	.	G	22	7	R	G	39	7	G
1	313981365	intergenic	A	G	81	16	G	G	93	16	G	G	87	16	G	.	.	.	.	.	.	.	.
1	256221173	intergenic	A	.	.	.	.	.	.	.	.	.	.	.	.	G	33	19	R	G	33	31	R
1	163229954	intergenic	A	.	.	.	.	.	.	.	.	.	.	.	.	C	33	6	C	C	70	17	M
1	256222056	intergenic	C	.	.	.	.	.	.	.	.	.	.	.	.	A	99	16	M	A	99	10	M
1	299479200	intergenic	G	.	.	.	.	.	.	.	.	.	.	.	.	A	99	10	R	A	27	5	A
1	163228948	intergenic	C	.	.	.	.	.	.	.	.	.	.	.	.	T	25	5	Y	T	91	26	Y
1	303109565	intergenic	G	.	.	.	.	.	.	.	.	.	.	.	.	C	99	20	S	C	69	9	S
1	299481371	intergenic	T	.	.	.	.	.	.	.	.	.	.	.	.	C	69	6	Y	C	99	8	Y
1	201814305	intergenic	A	.	.	.	.	.	.	.	.	.	.	.	.	C	99	18	M	C	99	19	C
1	72728726	intergenic	T	.	.	.	.	.	.	.	.	.	.	.	.	C	63	6	Y	C	51	10	C
1	204374677	intergenic	C	.	.	.	.	.	.	.	.	.	.	.	.	T	96	22	Y	T	99	44	Y
1	75386017	intergenic	T	.	.	.	.	.	.	.	.	.	.	.	.	G	33	7	G	G	33	7	G
1	283860268	intergenic	C	.	.	.	.	.	.	.	.	.	.	.	.	G	99	20	S	G	99	13	S
1	270006345	intergenic	T	.	.	.	.	.	.	.	.	.	.	.	.	G	33	6	G	G	48	14	K
1	31516875	intergenic	G	.	.	.	.	.	.	.	.	.	.	.	.	C	39	9	C	C	33	6	C
1	247517512	intergenic	C	.	.	.	.	.	.	.	.	.	.	.	.	G	99	14	S	G	99	77	S
1	251826947	intergenic	C	.	.	.	.	.	.	.	.	.	.	.	.	T	33	6	T	T	46	6	Y
1	179706028	intergenic	C	.	.	.	.	.	.	.	.	.	.	.	.	A	99	13	M	A	75	13	A
1	24711580	intergenic	C	.	.	.	.	.	.	.	.	.	.	.	.	T	93	16	T	T	93	13	Y
1	16507681	intergenic	T	.	.	.	.	.	.	.	.	.	.	.	.	G	40	37	K	G	96	49	K
1	266622524	intergenic	C	.	.	.	.	.	.	.	.	.	.	.	.	T	99	37	Y	T	99	69	T
1	283251444	intergenic	T	.	.	.	.	.	.	.	.	.	.	.	.	A	59	9	W	A	66	13	W
1	146599367	intergenic	A	.	.	.	.	.	.	.	.	.	.	.	.	G	33	6	G	G	75	13	G
1	161501476	intergenic	A	.	.	.	.	.	.	.	.	.	.	.	.	G	63	24	G	G	41	16	G
1	313854715	intergenic	C	.	.	.	.	.	.	.	.	.	.	.	.	T	33	6	T	T	90	11	Y
1	169422336	intergenic	G	.	.	.	.	.	.	.	.	.	.	.	.	A	88	15	R	A	87	7	R
1	25589035	intergenic	T	.	.	.	.	.	.	.	.	.	.	.	.	C	57	10	C	C	99	21	C
1	83131227	intergenic	T	.	.	.	.	.	.	.	.	.	.	.	.	C	51	9	C	C	33	6	C
1	303109931	intergenic	T	.	.	.	.	.	.	.	.	.	.	.	.	C	99	25	C	C	63	14	Y
1	142594642	intergenic	T	.	.	.	.	.	.	.	.	.	.	.	.	C	99	10	Y	C	58	6	Y
1	247517526	intergenic	T	.	.	.	.	.	.	.	.	.	.	.	.	C	24	9	Y	C	99	68	C
1	30409206	intergenic	C	.	.	.	.	.	.	.	.	.	.	.	.	T	27	6	T	T	33	6	T
1	163229447	intergenic	T	.	.	.	.	.	.	.	.	.	.	.	.	C	21	9	Y	C	33	6	C
1	145141272	intergenic	A	.	.	.	.	.	.	.	.	.	.	.	.	T	63	6	W	T	54	12	W
1	110410392	intergenic	T	.	.	.	.	.	.	.	.	.	.	.	.	G	99	38	K	G	99	74	K
1	119885301	intergenic	G	.	.	.	.	.	.	.	.	.	.	.	.	A	51	9	A	A	70	15	R
1	242393932	intergenic	G	.	.	.	.	.	.	.	.	.	.	.	.	A	63	11	A	A	39	7	A
1	3307616	intergenic	A	.	.	.	.	.	.	.	.	.	.	.	.	G	99	81	R	G	99	45	G
1	292880928	intergenic	G	.	.	.	.	.	.	.	.	.	.	.	.	A	24	7	R	A	36	20	R
1	169337158	intergenic	A	G	84	8	R	G	99	13	R	G	99	9	R	.	.	.	.	.	.	.	.
1	303108935	intergenic	T	.	.	.	.	.	.	.	.	.	.	.	.	C	57	10	C	C	27	6	Y
1	83194473	intergenic	C	.	.	.	.	.	.	.	.	.	.	.	.	T	99	18	T	T	51	9	T
1	61059876	intergenic	A	.	.	.	.	.	.	.	.	.	.	.	.	G	33	10	R	G	75	13	G
1	48059536	intergenic	C	.	.	.	.	.	.	.	.	.	.	.	.	T	93	10	Y	T	99	22	T
1	175754714	intergenic	C	G	21	5	G	G	27	7	G	G	33	7	G	.	.	.	.	.	.	.	.
1	179702953	intergenic	C	.	.	.	.	.	.	.	.	.	.	.	.	T	33	6	T	T	39	7	T
1	266623756	intergenic	T	.	.	.	.	.	.	.	.	.	.	.	.	C	99	43	Y	C	99	94	C
1	119885215	intergenic	C	.	.	.	.	.	.	.	.	.	.	.	.	T	33	6	T	T	45	8	T
1	163229750	intergenic	T	.	.	.	.	.	.	.	.	.	.	.	.	C	99	21	C	C	99	35	C
1	202240890	intergenic	C	.	.	.	.	.	.	.	.	.	.	.	.	T	40	8	Y	T	26	5	T
1	302447237	intergenic	C	.	.	.	.	.	.	.	.	.	.	.	.	T	39	7	T	T	45	8	T
1	314164928	intergenic	A	.	.	.	.	.	.	.	.	.	.	.	.	G	99	33	G	G	99	42	R
1	266622464	intergenic	A	.	.	.	.	.	.	.	.	.	.	.	.	T	52	37	W	T	74	39	W
1	34545074	intergenic	T	C	33	24	Y	C	53	10	Y	C	40	7	Y	.	.	.	.	.	.	.	.
1	97114334	intergenic	A	.	.	.	.	.	.	.	.	.	.	.	.	G	75	13	G	G	99	28	R
1	143129723	intergenic	G	.	.	.	.	.	.	.	.	.	.	.	.	A	99	93	R	A	99	46	R
1	283860371	intergenic	C	.	.	.	.	.	.	.	.	.	.	.	.	A	33	18	M	A	37	11	M
1	148271011	intergenic	A	.	.	.	.	.	.	.	.	.	.	.	.	G	99	16	R	G	99	53	R
1	137491567	intergenic	T	.	.	.	.	.	.	.	.	.	.	.	.	C	81	6	Y	C	34	5	Y
1	117466539	intergenic	C	.	.	.	.	.	.	.	.	.	.	.	.	T	80	16	Y	T	77	36	Y
1	24730304	intergenic	T	.	.	.	.	.	.	.	.	.	.	.	.	C	69	17	C	C	27	5	C
1	302605862	intergenic	C	.	.	.	.	.	.	.	.	.	.	.	.	T	50	5	Y	T	41	6	Y
1	148027722	intergenic	T	.	.	.	.	.	.	.	.	.	.	.	.	C	53	11	Y	C	99	10	Y
1	64116198	intergenic	G	.	.	.	.	.	.	.	.	.	.	.	.	A	34	6	R	A	99	20	R
1	69719773	intergenic	A	.	.	.	.	.	.	.	.	.	.	.	.	G	57	10	G	G	87	15	G
1	23568434	intergenic	C	.	.	.	.	.	.	.	.	.	.	.	.	T	89	80	Y	T	99	77	T
1	303109624	intergenic	G	.	.	.	.	.	.	.	.	.	.	.	.	A	71	11	R	A	40	10	R
1	103478310	intergenic	A	.	.	.	.	.	.	.	.	.	.	.	.	C	27	5	C	C	99	16	M
1	314164366	intergenic	A	.	.	.	.	.	.	.	.	.	.	.	.	G	62	15	G	G	30	23	R
1	266622999	intergenic	A	.	.	.	.	.	.	.	.	.	.	.	.	C	99	29	M	C	99	98	M
1	303870871	intergenic	G	A	61	18	R	A	86	13	R	A	55	8	R	.	.	.	.	.	.	.	.
1	146124051	intergenic	A	.	.	.	.	.	.	.	.	.	.	.	.	G	99	84	G	G	99	41	G
1	311669452	intergenic	A	.	.	.	.	.	.	.	.	.	.	.	.	G	54	23	G	G	44	19	G
1	63827811	intergenic	T	.	.	.	.	.	.	.	.	.	.	.	.	C	26	6	C	C	85	35	Y
1	313759921	intergenic	T	.	.	.	.	.	.	.	.	.	.	.	.	C	51	9	C	C	99	14	Y
1	16507988	intergenic	A	.	.	.	.	.	.	.	.	.	.	.	.	G	67	12	R	G	99	36	R
1	313764079	intergenic	A	.	.	.	.	.	.	.	.	.	.	.	.	G	99	84	R	G	99	58	R
1	118016737	intergenic	G	A	99	65	R	A	99	20	R	A	99	41	R	.	.	.	.	.	.	.	.
1	179891604	intergenic	T	.	.	.	.	.	.	.	.	.	.	.	.	G	33	7	K	G	45	8	G
1	169358348	intergenic	G	.	.	.	.	.	.	.	.	.	.	.	.	C	56	5	S	C	51	10	C
1	179702806	intergenic	A	.	.	.	.	.	.	.	.	.	.	.	.	G	27	6	G	G	63	11	G
1	175847915	intergenic	T	.	.	.	.	.	.	.	.	.	.	.	.	C	39	7	C	C	39	7	C
1	266624077	intergenic	C	.	.	.	.	.	.	.	.	.	.	.	.	T	99	27	Y	T	99	70	Y
1	10007058	intergenic	T	.	.	.	.	.	.	.	.	.	.	.	.	C	45	8	C	C	39	7	C
1	264175956	intergenic	G	.	.	.	.	.	.	.	.	.	.	.	.	T	30	12	K	T	45	8	T
1	117522892	intergenic	A	.	.	.	.	.	.	.	.	.	.	.	.	C	99	12	M	C	99	18	M
1	302606337	intergenic	T	.	.	.	.	.	.	.	.	.	.	.	.	C	98	13	Y	C	39	7	C
1	307040189	intergenic	T	.	.	.	.	.	.	.	.	.	.	.	.	C	69	12	C	C	99	11	Y
1	24729388	intergenic	T	.	.	.	.	.	.	.	.	.	.	.	.	C	54	6	Y	C	27	5	C
1	164783242	intergenic	T	.	.	.	.	.	.	.	.	.	.	.	.	C	44	7	Y	C	99	35	C
1	178852356	intergenic	G	.	.	.	.	.	.	.	.	.	.	.	.	A	63	11	R	A	99	61	A
1	249503581	intergenic	G	.	.	.	.	.	.	.	.	.	.	.	.	A	54	16	R	A	40	7	R
1	169360219	intergenic	A	.	.	.	.	.	.	.	.	.	.	.	.	C	62	16	M	C	91	19	M
1	9991389	intergenic	T	.	.	.	.	.	.	.	.	.	.	.	.	G	59	6	K	G	56	8	K
1	302447095	intergenic	C	.	.	.	.	.	.	.	.	.	.	.	.	T	66	7	Y	T	63	6	Y
1	137490715	intergenic	G	A	99	85	A	A	51	35	A	A	99	62	A	.	.	.	.	.	.	.	.
1	303167669	intergenic	G	.	.	.	.	.	.	.	.	.	.	.	.	T	99	23	T	T	89	19	K
1	270414490	intergenic	G	.	.	.	.	.	.	.	.	.	.	.	.	A	75	13	A	A	99	14	R
1	313819403	intergenic	C	.	.	.	.	.	.	.	.	.	.	.	.	A	99	66	A	A	99	90	M
1	35598144	intergenic	A	.	.	.	.	.	.	.	.	.	.	.	.	T	45	8	T	T	75	13	T
1	24711131	intergenic	T	.	.	.	.	.	.	.	.	.	.	.	.	C	99	23	C	C	39	8	C
1	313853520	intergenic	T	.	.	.	.	.	.	.	.	.	.	.	.	A	99	22	W	A	30	5	W
1	18972793	intergenic	A	.	.	.	.	.	.	.	.	.	.	.	.	T	33	6	T	T	75	16	T
1	16507633	intergenic	G	.	.	.	.	.	.	.	.	.	.	.	.	A	54	21	R	A	99	43	R
1	143102487	intergenic	G	.	.	.	.	.	.	.	.	.	.	.	.	T	30	6	K	T	54	10	K
1	110410665	intergenic	T	.	.	.	.	.	.	.	.	.	.	.	.	C	99	28	Y	C	99	84	Y
1	30408883	intergenic	C	.	.	.	.	.	.	.	.	.	.	.	.	T	99	57	Y	T	42	37	Y
1	84069729	intergenic	C	.	.	.	.	.	.	.	.	.	.	.	.	A	81	11	M	A	99	26	M
1	137491479	intergenic	A	.	.	.	.	.	.	.	.	.	.	.	.	G	44	5	R	G	48	10	R
1	110568313	intergenic	C	.	.	.	.	.	.	.	.	.	.	.	.	T	90	11	Y	T	57	11	T
1	227421150	intergenic	A	.	.	.	.	.	.	.	.	.	.	.	.	G	57	8	R	G	99	20	R
1	292880643	intergenic	A	.	.	.	.	.	.	.	.	.	.	.	.	T	27	5	T	T	87	18	T
1	313764164	intergenic	T	.	.	.	.	.	.	.	.	.	.	.	.	C	99	47	C	C	97	32	Y
1	48059426	intergenic	G	.	.	.	.	.	.	.	.	.	.	.	.	A	25	6	R	A	45	8	A
1	12202894	intergenic	T	.	.	.	.	.	.	.	.	.	.	.	.	C	99	19	C	C	33	6	C
1	143108469	intergenic	A	G	67	11	R	G	57	5	R	G	39	6	R	.	.	.	.	.	.	.	.
1	137491402	intergenic	A	.	.	.	.	.	.	.	.	.	.	.	.	C	33	7	C	C	94	8	M
1	164053063	intergenic	G	.	.	.	.	.	.	.	.	.	.	.	.	T	21	5	T	T	27	5	T
1	293367077	intergenic	T	.	.	.	.	.	.	.	.	.	.	.	.	C	27	7	C	C	33	6	C
1	143102565	intergenic	C	.	.	.	.	.	.	.	.	.	.	.	.	A	56	8	M	A	68	8	M
2	107913	ENSSSCG00000012837	G	.	.	.	.	.	.	.	.	.	.	.	.	C	99	84	S	C	99	62	C
2	111071	ENSSSCG00000012837	G	A	99	48	A	A	75	13	A	A	99	37	A	.	.	.	.	.	.	.	.
2	111082	ENSSSCG00000012837	G	A	79	41	A	A	87	15	A	A	99	35	A	.	.	.	.	.	.	.	.
2	114244	ENSSSCG00000012837	G	.	.	.	.	.	.	.	.	.	.	.	.	A	99	80	R	A	99	68	A
2	121924	ENSSSCG00000012837	C	T	33	22	T	T	75	14	T	T	42	13	Y	.	.	.	.	.	.	.	.
2	145074	ENSSSCG00000012840	G	.	.	.	.	.	.	.	.	.	.	.	.	A	58	20	R	A	87	16	A
2	185676	ENSSSCG00000012845	C	.	.	.	.	.	.	.	.	.	.	.	.	T	48	11	Y	T	63	13	T
2	199131	ENSSSCG00000012846	C	A	99	69	A	A	79	46	A	A	99	62	M	.	.	.	.	.	.	.	.
2	203119	ENSSSCG00000012847	T	.	.	.	.	.	.	.	.	.	.	.	.	C	99	99	Y	C	99	49	C
2	203611	ENSSSCG00000012847	G	A	99	44	A	A	67	24	A	A	99	25	R	.	.	.	.	.	.	.	.
2	204153	ENSSSCG00000012847	G	A	43	16	R	A	39	7	A	A	99	14	R	.	.	.	.	.	.	.	.
2	204705	ENSSSCG00000012847	T	.	.	.	.	.	.	.	.	.	.	.	.	C	99	38	Y	C	99	36	C
2	248974	ENSSSCG00000012850	A	.	.	.	.	.	.	.	.	.	.	.	.	G	99	34	R	G	99	22	G
2	299477	ENSSSCG00000012853;ENSSSCG00000029723	A	C	99	81	C	C	99	20	C	C	99	51	C	.	.	.	.	.	.	.	.
2	301695	ENSSSCG00000012853;ENSSSCG00000029723	G	A	45	9	A	A	45	8	A	A	99	9	R	.	.	.	.	.	.	.	.
2	343348	ENSSSCG00000012854	C	T	57	11	T	T	45	9	T	T	27	6	Y	.	.	.	.	.	.	.	.
2	440045	ENSSSCG00000012856	T	G	99	53	G	G	87	18	G	G	99	55	G	.	.	.	.	.	.	.	.
2	521061	ENSSSCG00000012857	A	.	.	.	.	.	.	.	.	.	.	.	.	G	99	21	G	G	49	13	R
2	776869	ENSSSCG00000012858	T	.	.	.	.	.	.	.	.	.	.	.	.	C	99	18	C	C	57	9	Y
2	777129	ENSSSCG00000012858	T	.	.	.	.	.	.	.	.	.	.	.	.	C	69	15	C	C	39	7	C
2	2095140	ENSSSCG00000012874	C	.	.	.	.	.	.	.	.	.	.	.	.	T	33	6	T	T	99	19	Y
2	2095552	ENSSSCG00000012874	A	.	.	.	.	.	.	.	.	.	.	.	.	G	87	15	G	G	99	18	G
2	2095722	ENSSSCG00000012874	G	.	.	.	.	.	.	.	.	.	.	.	.	A	51	9	A	A	27	5	A
2	2095899	ENSSSCG00000012874	A	.	.	.	.	.	.	.	.	.	.	.	.	G	93	16	G	G	99	29	G
2	2095983	ENSSSCG00000012874	A	.	.	.	.	.	.	.	.	.	.	.	.	G	99	18	G	G	99	25	G
2	2096065	ENSSSCG00000012874	C	.	.	.	.	.	.	.	.	.	.	.	.	T	51	9	T	T	99	18	T
2	2101264	ENSSSCG00000012874	G	.	.	.	.	.	.	.	.	.	.	.	.	A	39	7	A	A	75	13	A
2	2724623	ENSSSCG00000012875	C	.	.	.	.	.	.	.	.	.	.	.	.	G	45	8	G	G	27	5	G
2	2725947	ENSSSCG00000012875	C	.	.	.	.	.	.	.	.	.	.	.	.	A	39	7	A	A	63	11	A
2	2753560	ENSSSCG00000012878	G	.	.	.	.	.	.	.	.	.	.	.	.	A	33	7	R	A	28	15	R
2	2753608	ENSSSCG00000012878	G	.	.	.	.	.	.	.	.	.	.	.	.	A	99	14	R	A	86	20	R
2	2756882	ENSSSCG00000012878	G	T	99	21	K	T	99	7	K	T	66	13	K	.	.	.	.	.	.	.	.
2	2785586	ENSSSCG00000012879	G	.	.	.	.	.	.	.	.	.	.	.	.	A	99	10	R	A	57	8	R
2	2872954	ENSSSCG00000012880	A	.	.	.	.	.	.	.	.	.	.	.	.	G	27	5	G	G	66	7	R
2	2873097	ENSSSCG00000012880	A	.	.	.	.	.	.	.	.	.	.	.	.	G	75	13	G	G	63	8	R
2	2873147	ENSSSCG00000012880	T	.	.	.	.	.	.	.	.	.	.	.	.	C	45	8	C	C	30	5	Y
2	2873471	ENSSSCG00000012880	C	.	.	.	.	.	.	.	.	.	.	.	.	T	33	6	T	T	99	22	Y
2	3254207	ENSSSCG00000012886	A	.	.	.	.	.	.	.	.	.	.	.	.	G	71	11	R	G	39	7	G
2	3478073	ENSSSCG00000012890	G	T	99	54	T	T	99	18	T	T	99	35	T	.	.	.	.	.	.	.	.
2	3485062	ENSSSCG00000012890	C	.	.	.	.	.	.	.	.	.	.	.	.	G	25	5	S	G	36	15	S
2	3485499	ENSSSCG00000012890	C	.	.	.	.	.	.	.	.	.	.	.	.	T	99	58	Y	T	99	50	Y
2	3485906	ENSSSCG00000012890	G	.	.	.	.	.	.	.	.	.	.	.	.	C	99	58	C	C	99	61	S
2	3544302	ENSSSCG00000012893	G	.	.	.	.	.	.	.	.	.	.	.	.	A	57	30	R	A	88	59	R
2	3547196	ENSSSCG00000012893	T	.	.	.	.	.	.	.	.	.	.	.	.	C	99	75	C	C	72	85	Y
2	3550497	ENSSSCG00000012893	G	T	99	75	K	T	99	46	K	T	99	49	K	.	.	.	.	.	.	.	.
2	3550794	ENSSSCG00000012893	C	.	.	.	.	.	.	.	.	.	.	.	.	A	42	22	M	A	99	21	M
2	3744961	ENSSSCG00000012902	C	.	.	.	.	.	.	.	.	.	.	.	.	G	69	14	G	G	93	16	G
2	3745030	ENSSSCG00000012902	A	.	.	.	.	.	.	.	.	.	.	.	.	G	51	9	G	G	33	6	G
2	3750250	ENSSSCG00000012903	T	.	.	.	.	.	.	.	.	.	.	.	.	C	99	12	Y	C	92	8	Y
2	3752497	ENSSSCG00000012903	A	.	.	.	.	.	.	.	.	.	.	.	.	G	45	8	G	G	45	10	G
2	3753176	ENSSSCG00000012903	C	.	.	.	.	.	.	.	.	.	.	.	.	T	99	45	T	T	99	40	Y
2	3753365	ENSSSCG00000012903	C	.	.	.	.	.	.	.	.	.	.	.	.	T	99	52	T	T	99	35	T
2	3754249	ENSSSCG00000012903	G	A	99	43	R	A	99	24	R	A	99	35	A	.	.	.	.	.	.	.	.
2	3754764	ENSSSCG00000012903	T	C	99	60	Y	C	99	24	Y	C	75	29	C	.	.	.	.	.	.	.	.
2	3754937	ENSSSCG00000012903	C	T	99	41	Y	T	99	25	Y	T	37	27	T	.	.	.	.	.	.	.	.
2	3762420	ENSSSCG00000012904	C	.	.	.	.	.	.	.	.	.	.	.	.	T	99	68	T	T	99	93	Y
2	3762890	ENSSSCG00000012904	C	T	99	73	Y	T	99	36	Y	T	99	42	T	.	.	.	.	.	.	.	.
2	3777593	ENSSSCG00000012905	G	.	.	.	.	.	.	.	.	.	.	.	.	A	99	82	A	A	99	100	R
2	3780446	ENSSSCG00000012905	G	.	.	.	.	.	.	.	.	.	.	.	.	A	99	37	A	A	99	72	R
2	3780585	ENSSSCG00000012905	G	.	.	.	.	.	.	.	.	.	.	.	.	A	99	78	A	A	99	91	R
2	3807322	ENSSSCG00000012910	A	.	.	.	.	.	.	.	.	.	.	.	.	T	99	60	T	T	99	71	W
2	3810683	ENSSSCG00000012910	G	.	.	.	.	.	.	.	.	.	.	.	.	A	45	8	A	A	56	14	R
2	3810830	ENSSSCG00000012910	C	.	.	.	.	.	.	.	.	.	.	.	.	T	27	5	T	T	57	5	Y
2	3832650	ENSSSCG00000012912	A	.	.	.	.	.	.	.	.	.	.	.	.	G	99	27	G	G	48	13	R
2	3832850	ENSSSCG00000012912	C	.	.	.	.	.	.	.	.	.	.	.	.	T	81	14	T	T	99	11	Y
2	3834546	ENSSSCG00000012912	A	.	.	.	.	.	.	.	.	.	.	.	.	C	63	26	C	C	99	12	M
2	3835245	ENSSSCG00000012912	T	.	.	.	.	.	.	.	.	.	.	.	.	G	99	24	G	G	68	18	K
2	3836287	ENSSSCG00000012912	A	.	.	.	.	.	.	.	.	.	.	.	.	G	51	10	G	G	78	16	R
2	3840002	ENSSSCG00000012913;ENSSSCG00000012914	C	.	.	.	.	.	.	.	.	.	.	.	.	T	33	6	T	T	99	10	Y
2	3840195	ENSSSCG00000012913;ENSSSCG00000012914	A	.	.	.	.	.	.	.	.	.	.	.	.	G	39	7	G	G	39	12	R
2	3843719	ENSSSCG00000012914	T	.	.	.	.	.	.	.	.	.	.	.	.	C	99	36	C	C	99	44	C
2	3945568	ENSSSCG00000012916	C	.	.	.	.	.	.	.	.	.	.	.	.	T	63	12	T	T	62	12	Y
2	3987642	ENSSSCG00000012917	T	.	.	.	.	.	.	.	.	.	.	.	.	C	99	29	C	C	99	36	C
2	3987709	ENSSSCG00000012917	A	.	.	.	.	.	.	.	.	.	.	.	.	G	99	26	G	G	99	26	R
2	3988993	ENSSSCG00000012917	C	.	.	.	.	.	.	.	.	.	.	.	.	T	99	20	T	T	99	15	Y
2	3994544	ENSSSCG00000012918	G	.	.	.	.	.	.	.	.	.	.	.	.	A	33	15	R	A	70	9	R
2	3994550	ENSSSCG00000012918	A	.	.	.	.	.	.	.	.	.	.	.	.	G	69	13	G	G	74	9	R
2	3800990	ENSSSCG00000012920	C	.	.	.	.	.	.	.	.	.	.	.	.	T	99	18	T	T	51	10	Y
2	3801228	ENSSSCG00000012920	A	.	.	.	.	.	.	.	.	.	.	.	.	G	99	38	G	G	99	45	R
2	3801412	ENSSSCG00000012920	G	.	.	.	.	.	.	.	.	.	.	.	.	C	99	35	C	C	99	50	S
2	5129779	ENSSSCG00000012939	A	.	.	.	.	.	.	.	.	.	.	.	.	G	99	83	R	G	99	75	R
2	5130045	ENSSSCG00000012939	T	A	99	19	A	A	51	9	A	A	27	5	A	.	.	.	.	.	.	.	.
2	5130152	ENSSSCG00000012939	A	.	.	.	.	.	.	.	.	.	.	.	.	G	99	26	G	G	99	28	R
2	5130169	ENSSSCG00000012939	C	.	.	.	.	.	.	.	.	.	.	.	.	T	85	19	Y	T	58	20	Y
2	5055140	ENSSSCG00000012943	C	.	.	.	.	.	.	.	.	.	.	.	.	T	87	17	T	T	44	20	Y
2	5055166	ENSSSCG00000012943	G	.	.	.	.	.	.	.	.	.	.	.	.	A	99	24	A	A	78	43	R
2	5056486	ENSSSCG00000012943	G	.	.	.	.	.	.	.	.	.	.	.	.	C	99	39	C	C	99	61	S
2	5057682	ENSSSCG00000012943	G	.	.	.	.	.	.	.	.	.	.	.	.	A	99	27	A	A	99	49	R
2	5476742	ENSSSCG00000012963	C	.	.	.	.	.	.	.	.	.	.	.	.	T	99	84	T	T	99	92	Y
2	5476754	ENSSSCG00000012963	C	.	.	.	.	.	.	.	.	.	.	.	.	T	99	76	T	T	99	90	Y
2	5567878	ENSSSCG00000012971;ENSSSCG00000012973	C	.	.	.	.	.	.	.	.	.	.	.	.	G	99	20	G	G	91	15	S
2	5568735	ENSSSCG00000012971;ENSSSCG00000012973	G	.	.	.	.	.	.	.	.	.	.	.	.	T	69	12	T	T	99	12	K
2	5568869	ENSSSCG00000012971;ENSSSCG00000012973	A	.	.	.	.	.	.	.	.	.	.	.	.	G	33	6	G	G	57	10	G
2	5568913	ENSSSCG00000012971;ENSSSCG00000012973	C	.	.	.	.	.	.	.	.	.	.	.	.	T	21	6	T	T	45	8	T
2	5569185	ENSSSCG00000012971;ENSSSCG00000012973	C	.	.	.	.	.	.	.	.	.	.	.	.	T	87	16	T	T	56	7	Y
2	5572206	ENSSSCG00000012973	C	.	.	.	.	.	.	.	.	.	.	.	.	T	99	14	Y	T	94	8	Y
2	5578642	ENSSSCG00000012974	A	C	99	25	C	C	51	9	C	C	69	17	C	.	.	.	.	.	.	.	.
2	5675764	ENSSSCG00000012980	A	.	.	.	.	.	.	.	.	.	.	.	.	T	66	10	W	T	52	6	W
2	5699315	ENSSSCG00000012981	C	G	99	38	S	G	99	19	S	G	99	32	S	.	.	.	.	.	.	.	.
2	5762745	ENSSSCG00000012982	G	C	99	99	S	C	99	45	S	C	99	55	S	.	.	.	.	.	.	.	.
2	5762903	ENSSSCG00000012982	T	C	99	93	Y	C	99	49	Y	C	99	54	Y	.	.	.	.	.	.	.	.
2	5764226	ENSSSCG00000012982	C	.	.	.	.	.	.	.	.	.	.	.	.	T	65	74	Y	T	99	81	Y
2	5773288	ENSSSCG00000012983	T	.	.	.	.	.	.	.	.	.	.	.	.	G	99	45	K	G	62	23	K
2	5773346	ENSSSCG00000012983	G	.	.	.	.	.	.	.	.	.	.	.	.	A	99	31	A	A	99	27	R
2	5789156	ENSSSCG00000012983	T	.	.	.	.	.	.	.	.	.	.	.	.	G	27	5	G	G	93	16	G
2	5789239	ENSSSCG00000012983	T	.	.	.	.	.	.	.	.	.	.	.	.	C	39	7	C	C	75	14	C
2	5955972	ENSSSCG00000012992	T	.	.	.	.	.	.	.	.	.	.	.	.	G	45	9	G	G	99	26	G
2	5965408	ENSSSCG00000012992	A	.	.	.	.	.	.	.	.	.	.	.	.	G	45	8	G	G	57	10	G
2	6060824	ENSSSCG00000012997	G	.	.	.	.	.	.	.	.	.	.	.	.	A	99	35	R	A	99	29	R
2	6130043	ENSSSCG00000012999	A	G	99	68	G	G	99	51	G	G	99	77	G	.	.	.	.	.	.	.	.
2	6131127	ENSSSCG00000012999	C	G	99	100	G	G	99	84	G	G	99	74	G	.	.	.	.	.	.	.	.
2	6131395	ENSSSCG00000012999	T	.	.	.	.	.	.	.	.	.	.	.	.	C	57	6	Y	C	65	6	Y
2	6131518	ENSSSCG00000012999	C	.	.	.	.	.	.	.	.	.	.	.	.	T	57	10	T	T	27	5	T
2	6132094	ENSSSCG00000012999	C	T	99	91	T	T	99	70	T	T	99	88	T	.	.	.	.	.	.	.	.
2	6132967	ENSSSCG00000012999	A	.	.	.	.	.	.	.	.	.	.	.	.	G	33	8	G	G	39	7	G
2	6154084	ENSSSCG00000012999	T	G	99	85	G	G	99	45	G	G	99	57	G	.	.	.	.	.	.	.	.
2	6207758	ENSSSCG00000013003	C	.	.	.	.	.	.	.	.	.	.	.	.	A	99	10	M	A	39	9	A
2	6241806	ENSSSCG00000013008	T	.	.	.	.	.	.	.	.	.	.	.	.	C	33	6	C	C	57	10	C
2	6380004	ENSSSCG00000013016	T	.	.	.	.	.	.	.	.	.	.	.	.	C	33	7	C	C	51	10	C
2	6491487	ENSSSCG00000013019	A	.	.	.	.	.	.	.	.	.	.	.	.	C	34	14	M	C	39	7	C
2	6493297	ENSSSCG00000013019	C	.	.	.	.	.	.	.	.	.	.	.	.	T	64	10	Y	T	87	15	T
2	6506048	ENSSSCG00000013020	A	.	.	.	.	.	.	.	.	.	.	.	.	G	39	7	G	G	51	9	G
2	6506076	ENSSSCG00000013020	C	.	.	.	.	.	.	.	.	.	.	.	.	T	99	8	Y	T	51	9	T
2	6506268	ENSSSCG00000013020	C	.	.	.	.	.	.	.	.	.	.	.	.	T	24	7	Y	T	33	6	T
2	6509124	ENSSSCG00000013020	A	.	.	.	.	.	.	.	.	.	.	.	.	G	99	8	R	G	45	8	G
2	6558837	ENSSSCG00000013023	G	A	99	90	A	A	99	32	A	A	99	64	A	.	.	.	.	.	.	.	.
2	6560767	ENSSSCG00000013023	G	A	99	77	R	A	99	45	R	A	99	63	A	.	.	.	.	.	.	.	.
2	6571263	ENSSSCG00000013023	C	A	99	87	A	A	99	41	A	A	99	60	A	.	.	.	.	.	.	.	.
2	6895617	ENSSSCG00000013032	T	.	.	.	.	.	.	.	.	.	.	.	.	C	27	5	C	C	27	6	C
2	6916197	ENSSSCG00000013034	A	.	.	.	.	.	.	.	.	.	.	.	.	G	63	11	G	G	27	5	G
2	6920324	ENSSSCG00000013034	A	.	.	.	.	.	.	.	.	.	.	.	.	G	33	6	G	G	39	7	G
2	6936527	ENSSSCG00000013036	G	A	99	55	A	A	99	23	A	A	99	39	A	.	.	.	.	.	.	.	.
2	6942772	ENSSSCG00000013037	T	.	.	.	.	.	.	.	.	.	.	.	.	C	69	14	C	C	33	6	C
2	6954071	ENSSSCG00000013041	T	C	51	48	C	C	65	75	Y	C	95	73	Y	.	.	.	.	.	.	.	.
2	6954089	ENSSSCG00000013041	G	A	62	19	R	A	99	65	R	A	99	59	R	.	.	.	.	.	.	.	.
2	6954577	ENSSSCG00000013041	A	.	.	.	.	.	.	.	.	.	.	.	.	G	27	5	G	G	27	5	G
2	6995372	ENSSSCG00000013042;ENSSSCG00000021620	A	.	.	.	.	.	.	.	.	.	.	.	.	C	99	18	M	C	39	10	M
2	6997552	ENSSSCG00000013042;ENSSSCG00000021620	T	.	.	.	.	.	.	.	.	.	.	.	.	G	99	44	K	G	99	42	K
2	6997571	ENSSSCG00000013042;ENSSSCG00000021620	C	.	.	.	.	.	.	.	.	.	.	.	.	T	76	36	Y	T	99	38	Y
2	6998288	ENSSSCG00000013042;ENSSSCG00000021620	T	.	.	.	.	.	.	.	.	.	.	.	.	C	83	31	Y	C	88	27	Y
2	6998435	ENSSSCG00000013042;ENSSSCG00000021620	C	.	.	.	.	.	.	.	.	.	.	.	.	G	54	16	S	G	86	31	S
2	7002209	ENSSSCG00000013042;ENSSSCG00000021620	G	.	.	.	.	.	.	.	.	.	.	.	.	A	99	27	R	A	99	39	R
2	7005894	ENSSSCG00000013042;ENSSSCG00000021620	G	.	.	.	.	.	.	.	.	.	.	.	.	A	99	98	R	A	99	78	R
2	7007223	ENSSSCG00000013042;ENSSSCG00000021620	G	.	.	.	.	.	.	.	.	.	.	.	.	A	99	86	R	A	99	59	R
2	7009112	ENSSSCG00000013042;ENSSSCG00000021620	T	.	.	.	.	.	.	.	.	.	.	.	.	C	99	23	C	C	69	13	C
2	7009692	ENSSSCG00000013042;ENSSSCG00000021620	G	.	.	.	.	.	.	.	.	.	.	.	.	A	99	23	A	A	33	6	A
2	7465281	ENSSSCG00000013048	T	.	.	.	.	.	.	.	.	.	.	.	.	C	87	17	C	C	87	16	C
2	7501698	ENSSSCG00000013048	A	.	.	.	.	.	.	.	.	.	.	.	.	C	45	9	C	C	45	12	C
2	7600651	ENSSSCG00000013052	T	.	.	.	.	.	.	.	.	.	.	.	.	C	99	15	Y	C	33	6	C
2	7683676	ENSSSCG00000013052	G	.	.	.	.	.	.	.	.	.	.	.	.	A	70	14	R	A	28	9	R
2	7648278	ENSSSCG00000013052;ENSSSCG00000013054	G	.	.	.	.	.	.	.	.	.	.	.	.	A	54	11	R	A	99	22	R
2	7648500	ENSSSCG00000013052;ENSSSCG00000013054	T	.	.	.	.	.	.	.	.	.	.	.	.	C	99	28	C	C	99	55	Y
2	7653583	ENSSSCG00000013052;ENSSSCG00000026914	T	.	.	.	.	.	.	.	.	.	.	.	.	C	99	22	Y	C	99	27	Y
2	8479494	ENSSSCG00000013061	G	A	99	49	A	A	99	39	A	A	99	33	A	.	.	.	.	.	.	.	.
2	8488402	ENSSSCG00000013062	A	C	99	54	C	C	99	27	M	C	99	41	M	.	.	.	.	.	.	.	.
2	8492395	ENSSSCG00000013062	T	C	99	63	C	C	99	29	C	C	99	47	C	.	.	.	.	.	.	.	.
2	8501205	ENSSSCG00000013063	T	.	.	.	.	.	.	.	.	.	.	.	.	C	39	7	C	C	51	9	C
2	8505634	ENSSSCG00000013063	G	.	.	.	.	.	.	.	.	.	.	.	.	A	53	7	R	A	54	9	R
2	8874694	ENSSSCG00000013066	C	.	.	.	.	.	.	.	.	.	.	.	.	T	60	7	Y	T	81	15	T
2	9163898	ENSSSCG00000013073	G	A	99	19	R	A	69	12	A	A	99	24	R	.	.	.	.	.	.	.	.
2	9622493	ENSSSCG00000013082	A	.	.	.	.	.	.	.	.	.	.	.	.	G	81	14	G	G	51	9	G
2	9708481	ENSSSCG00000013087	C	.	.	.	.	.	.	.	.	.	.	.	.	T	99	31	Y	T	43	25	Y
2	9709626	ENSSSCG00000013087	G	.	.	.	.	.	.	.	.	.	.	.	.	A	99	44	R	A	99	28	R
2	9711002	ENSSSCG00000013087	A	.	.	.	.	.	.	.	.	.	.	.	.	G	99	17	R	G	99	17	R
2	9727155	ENSSSCG00000013094	C	.	.	.	.	.	.	.	.	.	.	.	.	T	54	26	Y	T	99	17	Y
2	9736800	ENSSSCG00000013094	G	.	.	.	.	.	.	.	.	.	.	.	.	C	42	13	S	C	99	31	S
2	9738070	ENSSSCG00000013094	T	.	.	.	.	.	.	.	.	.	.	.	.	C	84	28	Y	C	99	15	Y
2	9748336	ENSSSCG00000013094	C	.	.	.	.	.	.	.	.	.	.	.	.	T	99	100	T	T	99	91	Y
2	9748558	ENSSSCG00000013094	C	.	.	.	.	.	.	.	.	.	.	.	.	T	99	47	T	T	99	59	Y
2	10960221	ENSSSCG00000013099	C	.	.	.	.	.	.	.	.	.	.	.	.	T	99	10	Y	T	99	36	Y
2	10960294	ENSSSCG00000013099	C	.	.	.	.	.	.	.	.	.	.	.	.	T	93	8	Y	T	99	23	Y
2	10960941	ENSSSCG00000013099	G	.	.	.	.	.	.	.	.	.	.	.	.	A	33	6	A	A	62	22	R
2	10961248	ENSSSCG00000013099	T	.	.	.	.	.	.	.	.	.	.	.	.	C	27	5	C	C	28	5	Y
2	10962384	ENSSSCG00000013099	G	.	.	.	.	.	.	.	.	.	.	.	.	T	27	5	T	T	94	8	K
2	10926892	ENSSSCG00000013101	C	.	.	.	.	.	.	.	.	.	.	.	.	T	58	8	Y	T	99	15	Y
2	10295127	ENSSSCG00000013111	A	G	99	29	G	G	54	9	R	G	99	22	R	.	.	.	.	.	.	.	.
2	10295888	ENSSSCG00000013111	T	.	.	.	.	.	.	.	.	.	.	.	.	C	99	23	Y	C	99	55	Y
2	10296018	ENSSSCG00000013111	C	.	.	.	.	.	.	.	.	.	.	.	.	T	99	66	Y	T	99	65	Y
2	10297184	ENSSSCG00000013111	T	.	.	.	.	.	.	.	.	.	.	.	.	G	99	58	G	G	99	90	K
2	10251522	ENSSSCG00000013111;ENSSSCG00000013115	T	G	99	56	G	G	99	34	G	G	99	62	G	.	.	.	.	.	.	.	.
2	10251648	ENSSSCG00000013111;ENSSSCG00000013115	T	C	99	50	C	C	99	30	C	C	99	25	C	.	.	.	.	.	.	.	.
2	10253626	ENSSSCG00000013111;ENSSSCG00000013115	C	.	.	.	.	.	.	.	.	.	.	.	.	T	48	13	Y	T	33	8	Y
2	10255190	ENSSSCG00000013111;ENSSSCG00000013115	T	.	.	.	.	.	.	.	.	.	.	.	.	G	27	5	G	G	43	9	K
2	10256507	ENSSSCG00000013111;ENSSSCG00000013115	T	C	68	35	Y	C	27	20	Y	C	30	57	Y	.	.	.	.	.	.	.	.
2	10258449	ENSSSCG00000013111;ENSSSCG00000013115	G	.	.	.	.	.	.	.	.	.	.	.	.	C	51	9	C	C	99	12	S
2	10260088	ENSSSCG00000013111;ENSSSCG00000013115	C	T	99	67	Y	T	99	45	Y	T	99	39	Y	.	.	.	.	.	.	.	.
2	10260578	ENSSSCG00000013111;ENSSSCG00000013115	C	T	99	74	T	T	99	43	T	T	99	42	Y	.	.	.	.	.	.	.	.
2	10260698	ENSSSCG00000013111;ENSSSCG00000013115	C	T	99	63	Y	T	99	41	Y	T	99	57	Y	.	.	.	.	.	.	.	.
2	11089208	ENSSSCG00000013118	T	.	.	.	.	.	.	.	.	.	.	.	.	C	87	15	C	C	81	15	C
2	11092954	ENSSSCG00000013118	T	.	.	.	.	.	.	.	.	.	.	.	.	C	27	5	C	C	75	13	C
2	11384726	ENSSSCG00000013125	A	.	.	.	.	.	.	.	.	.	.	.	.	G	55	9	R	G	33	6	G
2	12623455	ENSSSCG00000013171	A	T	99	89	T	T	99	32	T	T	99	60	T	.	.	.	.	.	.	.	.
2	12883654	ENSSSCG00000013177	A	.	.	.	.	.	.	.	.	.	.	.	.	C	56	14	M	C	99	17	M
2	12883743	ENSSSCG00000013177	T	.	.	.	.	.	.	.	.	.	.	.	.	C	50	18	Y	C	60	17	Y
2	12957904	ENSSSCG00000013181	T	.	.	.	.	.	.	.	.	.	.	.	.	C	62	51	Y	C	99	33	C
2	12958068	ENSSSCG00000013181	C	.	.	.	.	.	.	.	.	.	.	.	.	T	89	56	Y	T	99	86	Y
2	16592165	ENSSSCG00000013243	A	.	.	.	.	.	.	.	.	.	.	.	.	C	30	8	M	C	45	8	C
2	17480140	ENSSSCG00000013259	T	A	99	41	W	A	52	22	W	A	49	14	W	.	.	.	.	.	.	.	.
2	18928378	ENSSSCG00000013277	G	A	99	39	R	A	99	30	R	A	99	29	R	.	.	.	.	.	.	.	.
2	28462110	ENSSSCG00000013298;ENSSSCG00000013299	C	.	.	.	.	.	.	.	.	.	.	.	.	A	67	5	M	A	77	11	M
2	28861130	ENSSSCG00000013302	T	.	.	.	.	.	.	.	.	.	.	.	.	C	99	51	Y	C	99	43	Y
2	28861243	ENSSSCG00000013302	T	.	.	.	.	.	.	.	.	.	.	.	.	C	99	43	Y	C	99	56	Y
2	28864038	ENSSSCG00000013302	C	.	.	.	.	.	.	.	.	.	.	.	.	A	99	32	M	A	99	51	M
2	28869310	ENSSSCG00000013302	G	.	.	.	.	.	.	.	.	.	.	.	.	A	99	24	R	A	99	51	R
2	29159639	ENSSSCG00000013304	T	.	.	.	.	.	.	.	.	.	.	.	.	C	99	13	Y	C	69	6	Y
2	29169889	ENSSSCG00000013304	G	.	.	.	.	.	.	.	.	.	.	.	.	A	60	7	R	A	89	7	R
2	29178171	ENSSSCG00000013304	A	.	.	.	.	.	.	.	.	.	.	.	.	G	53	8	R	G	69	6	R
2	29208907	ENSSSCG00000013305	T	.	.	.	.	.	.	.	.	.	.	.	.	C	39	7	C	C	99	19	Y
2	29801245	ENSSSCG00000013308	T	C	33	6	C	C	51	9	C	C	55	11	Y	.	.	.	.	.	.	.	.
2	30755936	ENSSSCG00000013315	A	.	.	.	.	.	.	.	.	.	.	.	.	G	99	39	R	G	99	86	R
2	31813170	ENSSSCG00000013322;ENSSSCG00000026083	A	.	.	.	.	.	.	.	.	.	.	.	.	T	63	12	T	T	99	22	T
2	41963700	ENSSSCG00000013349	A	.	.	.	.	.	.	.	.	.	.	.	.	C	99	11	M	C	99	34	M
2	41979860	ENSSSCG00000013349	A	.	.	.	.	.	.	.	.	.	.	.	.	G	66	6	R	G	63	14	R
2	41980314	ENSSSCG00000013349	C	.	.	.	.	.	.	.	.	.	.	.	.	A	39	7	A	A	51	10	A
2	43759750	ENSSSCG00000013362;ENSSSCG00000013364	G	C	99	48	S	C	99	36	S	C	99	45	S	.	.	.	.	.	.	.	.
2	43995778	ENSSSCG00000013368	A	.	.	.	.	.	.	.	.	.	.	.	.	G	99	11	R	G	99	18	R
2	44416875	ENSSSCG00000013373	A	.	.	.	.	.	.	.	.	.	.	.	.	G	99	24	R	G	99	20	R
2	47596522	ENSSSCG00000013388	G	.	.	.	.	.	.	.	.	.	.	.	.	A	99	17	R	A	27	5	A
2	47606933	ENSSSCG00000013388	T	.	.	.	.	.	.	.	.	.	.	.	.	C	54	8	Y	C	21	5	C
2	47607599	ENSSSCG00000013388	C	.	.	.	.	.	.	.	.	.	.	.	.	T	49	12	Y	T	45	8	T
2	47703085	ENSSSCG00000013390	A	.	.	.	.	.	.	.	.	.	.	.	.	C	33	6	C	C	27	5	C
2	50763372	ENSSSCG00000013402	C	.	.	.	.	.	.	.	.	.	.	.	.	T	99	17	T	T	66	5	Y
2	52014704	ENSSSCG00000013405	T	.	.	.	.	.	.	.	.	.	.	.	.	C	27	6	C	C	63	22	Y
2	77567067	ENSSSCG00000013414	T	.	.	.	.	.	.	.	.	.	.	.	.	C	68	15	Y	C	99	43	C
2	77495500	ENSSSCG00000013416	G	.	.	.	.	.	.	.	.	.	.	.	.	C	48	13	S	C	28	10	S
2	77578763	ENSSSCG00000013423	T	.	.	.	.	.	.	.	.	.	.	.	.	C	99	36	Y	C	99	36	C
2	78193751	ENSSSCG00000013437	T	.	.	.	.	.	.	.	.	.	.	.	.	C	83	11	Y	C	99	30	Y
2	78193768	ENSSSCG00000013437	T	.	.	.	.	.	.	.	.	.	.	.	.	C	72	11	Y	C	99	23	Y
2	77150941	ENSSSCG00000013442	T	.	.	.	.	.	.	.	.	.	.	.	.	C	69	17	Y	C	51	14	Y
2	76856045	ENSSSCG00000013460	C	.	.	.	.	.	.	.	.	.	.	.	.	T	45	9	T	T	27	5	T
2	76857953	ENSSSCG00000013460	A	.	.	.	.	.	.	.	.	.	.	.	.	C	75	13	C	C	99	34	C
2	75781930	ENSSSCG00000013481	G	.	.	.	.	.	.	.	.	.	.	.	.	A	54	12	R	A	50	23	R
2	75782726	ENSSSCG00000013481	A	.	.	.	.	.	.	.	.	.	.	.	.	G	99	12	R	G	99	18	R
2	75787724	ENSSSCG00000013481	C	.	.	.	.	.	.	.	.	.	.	.	.	G	99	39	S	G	99	43	S
2	75509934	ENSSSCG00000013494	A	.	.	.	.	.	.	.	.	.	.	.	.	G	63	12	G	G	45	8	G
2	75072921	ENSSSCG00000013501	G	.	.	.	.	.	.	.	.	.	.	.	.	A	99	24	R	A	99	44	A
2	74943090	ENSSSCG00000013507	A	.	.	.	.	.	.	.	.	.	.	.	.	G	99	37	G	G	99	19	G
2	74874033	ENSSSCG00000013509	T	.	.	.	.	.	.	.	.	.	.	.	.	C	51	9	C	C	81	13	Y
2	74828633	ENSSSCG00000013511	T	.	.	.	.	.	.	.	.	.	.	.	.	C	99	31	C	C	99	23	Y
2	74793958	ENSSSCG00000013514	G	.	.	.	.	.	.	.	.	.	.	.	.	A	99	57	R	A	99	39	R
2	73893409	ENSSSCG00000013522	G	.	.	.	.	.	.	.	.	.	.	.	.	A	99	17	R	A	99	49	R
2	73922624	ENSSSCG00000013523	C	.	.	.	.	.	.	.	.	.	.	.	.	A	99	37	M	A	99	37	M
2	73939288	ENSSSCG00000013523	G	.	.	.	.	.	.	.	.	.	.	.	.	A	99	79	R	A	99	75	R
2	73799102	ENSSSCG00000013526	T	.	.	.	.	.	.	.	.	.	.	.	.	C	99	24	Y	C	99	19	Y
2	73695954	ENSSSCG00000013533	C	.	.	.	.	.	.	.	.	.	.	.	.	T	99	31	Y	T	99	31	Y
2	73205854	ENSSSCG00000013539	T	.	.	.	.	.	.	.	.	.	.	.	.	C	99	57	Y	C	99	56	Y
2	72977838	ENSSSCG00000013546	C	.	.	.	.	.	.	.	.	.	.	.	.	G	99	53	S	G	99	23	S
2	73051043	ENSSSCG00000013547	G	.	.	.	.	.	.	.	.	.	.	.	.	A	44	8	R	A	51	9	A
2	72851216	ENSSSCG00000013553	G	.	.	.	.	.	.	.	.	.	.	.	.	A	99	46	R	A	99	79	R
2	72723270	ENSSSCG00000013556	A	.	.	.	.	.	.	.	.	.	.	.	.	C	99	23	M	C	99	19	M
2	72735917	ENSSSCG00000013556	T	.	.	.	.	.	.	.	.	.	.	.	.	C	99	33	Y	C	99	17	Y
2	72735968	ENSSSCG00000013556	C	.	.	.	.	.	.	.	.	.	.	.	.	T	99	37	Y	T	99	15	Y
2	72739193	ENSSSCG00000013556	T	.	.	.	.	.	.	.	.	.	.	.	.	C	99	36	Y	C	92	7	Y
2	72739295	ENSSSCG00000013556	T	.	.	.	.	.	.	.	.	.	.	.	.	G	99	45	K	G	89	8	K
2	72179617	ENSSSCG00000013568	G	.	.	.	.	.	.	.	.	.	.	.	.	A	99	50	R	A	99	73	R
2	72179631	ENSSSCG00000013568	T	.	.	.	.	.	.	.	.	.	.	.	.	C	99	39	Y	C	99	73	Y
2	72194036	ENSSSCG00000013568	A	.	.	.	.	.	.	.	.	.	.	.	.	T	99	20	W	T	99	25	W
2	72194829	ENSSSCG00000013568	T	.	.	.	.	.	.	.	.	.	.	.	.	C	99	17	Y	C	98	29	Y
2	72132242	ENSSSCG00000013570	G	.	.	.	.	.	.	.	.	.	.	.	.	A	73	9	R	A	27	6	R
2	72132331	ENSSSCG00000013570	A	.	.	.	.	.	.	.	.	.	.	.	.	G	41	8	R	G	30	5	R
2	72151650	ENSSSCG00000013570	A	.	.	.	.	.	.	.	.	.	.	.	.	G	65	5	R	G	27	6	R
2	72035268	ENSSSCG00000013572	G	.	.	.	.	.	.	.	.	.	.	.	.	A	79	21	R	A	30	5	R
2	72047936	ENSSSCG00000013572	G	.	.	.	.	.	.	.	.	.	.	.	.	A	99	73	R	A	99	61	R
2	72051384	ENSSSCG00000013572	T	.	.	.	.	.	.	.	.	.	.	.	.	C	99	47	Y	C	99	43	Y
2	71884276	ENSSSCG00000013573	T	.	.	.	.	.	.	.	.	.	.	.	.	A	99	63	W	A	99	63	W
2	71635915	ENSSSCG00000013592	G	.	.	.	.	.	.	.	.	.	.	.	.	A	99	9	R	A	99	34	R
2	71406033	ENSSSCG00000013595	C	.	.	.	.	.	.	.	.	.	.	.	.	T	70	15	Y	T	61	7	Y
2	71407640	ENSSSCG00000013595	A	.	.	.	.	.	.	.	.	.	.	.	.	G	59	6	R	G	74	11	R
2	71411629	ENSSSCG00000013595	C	.	.	.	.	.	.	.	.	.	.	.	.	T	99	30	Y	T	99	25	Y
2	71321620	ENSSSCG00000013596	A	.	.	.	.	.	.	.	.	.	.	.	.	G	99	81	R	G	99	78	R
2	71328322	ENSSSCG00000013596	A	.	.	.	.	.	.	.	.	.	.	.	.	G	58	86	R	G	99	77	R
2	71251475	ENSSSCG00000013600	G	.	.	.	.	.	.	.	.	.	.	.	.	T	72	44	K	T	59	44	K
2	71253095	ENSSSCG00000013600	G	.	.	.	.	.	.	.	.	.	.	.	.	A	99	80	R	A	99	74	R
2	71243824	ENSSSCG00000013600;ENSSSCG00000013601	C	.	.	.	.	.	.	.	.	.	.	.	.	A	99	25	M	A	99	28	M
2	71228674	ENSSSCG00000013601	T	.	.	.	.	.	.	.	.	.	.	.	.	G	99	44	G	G	99	44	G
2	71157751	ENSSSCG00000013604	A	.	.	.	.	.	.	.	.	.	.	.	.	G	47	22	R	G	43	8	R
2	70508035	ENSSSCG00000013615	A	.	.	.	.	.	.	.	.	.	.	.	.	T	93	20	W	T	57	9	W
2	70511650	ENSSSCG00000013615	A	.	.	.	.	.	.	.	.	.	.	.	.	G	99	35	R	G	99	27	R
2	70400348	ENSSSCG00000013622	C	T	99	22	T	T	21	18	T	T	99	23	T	.	.	.	.	.	.	.	.
2	70387491	ENSSSCG00000013623	T	.	.	.	.	.	.	.	.	.	.	.	.	C	27	18	C	C	21	14	C
2	70389313	ENSSSCG00000013623	C	.	.	.	.	.	.	.	.	.	.	.	.	T	84	23	Y	T	99	22	Y
2	70246409	ENSSSCG00000013629	G	.	.	.	.	.	.	.	.	.	.	.	.	A	99	46	R	A	99	31	R
2	70273540	ENSSSCG00000013629	A	.	.	.	.	.	.	.	.	.	.	.	.	G	76	8	R	G	99	17	R
2	70067917	ENSSSCG00000013633	C	.	.	.	.	.	.	.	.	.	.	.	.	T	33	6	T	T	82	8	Y
2	70083785	ENSSSCG00000013634	T	.	.	.	.	.	.	.	.	.	.	.	.	A	99	17	W	A	81	10	W
2	70085290	ENSSSCG00000013635	C	.	.	.	.	.	.	.	.	.	.	.	.	G	63	11	G	G	33	6	G
2	69820768	ENSSSCG00000013638	C	.	.	.	.	.	.	.	.	.	.	.	.	T	99	22	Y	T	99	62	Y
2	69771797	ENSSSCG00000013639	A	.	.	.	.	.	.	.	.	.	.	.	.	G	99	49	R	G	99	94	R
2	69648402	ENSSSCG00000013641;ENSSSCG00000028460	A	.	.	.	.	.	.	.	.	.	.	.	.	G	99	24	R	G	99	37	R
2	69717919	ENSSSCG00000013644	G	.	.	.	.	.	.	.	.	.	.	.	.	A	99	34	R	A	99	30	R
2	69720071	ENSSSCG00000013644	G	.	.	.	.	.	.	.	.	.	.	.	.	A	99	11	R	A	41	13	R
2	69713941	ENSSSCG00000013644;ENSSSCG00000013645	C	T	51	9	T	T	63	13	T	T	39	7	T	.	.	.	.	.	.	.	.
2	69492310	ENSSSCG00000013648;ENSSSCG00000013655	T	.	.	.	.	.	.	.	.	.	.	.	.	C	99	12	Y	C	99	12	Y
2	69479433	ENSSSCG00000013649;ENSSSCG00000013655	G	C	45	8	C	C	45	8	C	C	57	10	C	.	.	.	.	.	.	.	.
2	69464355	ENSSSCG00000013655	G	A	99	46	A	A	81	14	A	A	75	33	A	.	.	.	.	.	.	.	.
2	69490844	ENSSSCG00000013655	T	.	.	.	.	.	.	.	.	.	.	.	.	C	48	14	Y	C	46	10	Y
2	69323415	ENSSSCG00000013659	A	.	.	.	.	.	.	.	.	.	.	.	.	G	72	5	R	G	99	22	R
2	69294198	ENSSSCG00000013661;ENSSSCG00000024072	T	.	.	.	.	.	.	.	.	.	.	.	.	C	99	49	Y	C	44	14	Y
2	69287282	ENSSSCG00000013662	C	.	.	.	.	.	.	.	.	.	.	.	.	T	83	25	Y	T	99	23	Y
2	69289151	ENSSSCG00000013662	A	.	.	.	.	.	.	.	.	.	.	.	.	G	99	38	R	G	99	30	R
2	69289165	ENSSSCG00000013662	C	.	.	.	.	.	.	.	.	.	.	.	.	T	99	34	Y	T	99	26	Y
2	69289702	ENSSSCG00000013662	A	.	.	.	.	.	.	.	.	.	.	.	.	C	99	59	M	C	99	29	M
2	69290166	ENSSSCG00000013662	G	.	.	.	.	.	.	.	.	.	.	.	.	A	99	30	R	A	99	15	R
2	66720840	ENSSSCG00000013720	G	A	99	62	R	A	99	29	R	A	99	63	R	.	.	.	.	.	.	.	.
2	66684344	ENSSSCG00000013722;ENSSSCG00000013723	C	.	.	.	.	.	.	.	.	.	.	.	.	T	99	52	Y	T	99	46	Y
2	66211759	ENSSSCG00000013753	G	A	99	85	A	A	67	39	A	A	99	59	A	.	.	.	.	.	.	.	.
2	65694263	ENSSSCG00000013755	G	.	.	.	.	.	.	.	.	.	.	.	.	A	99	15	R	A	99	13	R
2	65675974	ENSSSCG00000013756	C	T	57	19	Y	T	39	29	Y	T	99	38	Y	.	.	.	.	.	.	.	.
2	65669947	ENSSSCG00000013757	G	.	.	.	.	.	.	.	.	.	.	.	.	A	99	40	R	A	99	25	R
2	65521632	ENSSSCG00000013761	T	.	.	.	.	.	.	.	.	.	.	.	.	C	99	12	Y	C	86	12	Y
2	65521638	ENSSSCG00000013761	G	.	.	.	.	.	.	.	.	.	.	.	.	A	99	11	R	A	64	12	R
2	65521951	ENSSSCG00000013761	G	.	.	.	.	.	.	.	.	.	.	.	.	T	99	13	K	T	99	10	K
2	65114128	ENSSSCG00000013775;ENSSSCG00000013776	C	.	.	.	.	.	.	.	.	.	.	.	.	T	58	9	Y	T	58	8	Y
2	65063098	ENSSSCG00000013777	A	.	.	.	.	.	.	.	.	.	.	.	.	G	57	10	G	G	45	8	G
2	65063254	ENSSSCG00000013777	A	.	.	.	.	.	.	.	.	.	.	.	.	G	75	16	R	G	75	15	G
2	65063311	ENSSSCG00000013777	T	.	.	.	.	.	.	.	.	.	.	.	.	C	61	17	Y	C	99	21	C
2	65063664	ENSSSCG00000013777	G	.	.	.	.	.	.	.	.	.	.	.	.	A	49	11	R	A	93	7	R
2	65190130	ENSSSCG00000013780	C	.	.	.	.	.	.	.	.	.	.	.	.	T	99	70	Y	T	99	52	Y
2	64784217	ENSSSCG00000013785	G	.	.	.	.	.	.	.	.	.	.	.	.	A	99	11	R	A	29	8	R
2	62007167	ENSSSCG00000013829;ENSSSCG00000013830	C	.	.	.	.	.	.	.	.	.	.	.	.	T	99	30	Y	T	94	8	Y
2	62004058	ENSSSCG00000013830	T	.	.	.	.	.	.	.	.	.	.	.	.	C	99	19	Y	C	99	15	Y
2	61719088	ENSSSCG00000013839	G	A	99	46	R	A	99	39	R	A	99	50	R	.	.	.	.	.	.	.	.
2	61349181	ENSSSCG00000013842	G	.	.	.	.	.	.	.	.	.	.	.	.	A	64	6	R	A	72	19	R
2	61350093	ENSSSCG00000013842	C	.	.	.	.	.	.	.	.	.	.	.	.	T	45	9	T	T	33	6	T
2	61196180	ENSSSCG00000013848	C	T	99	27	Y	T	53	8	Y	T	46	18	Y	.	.	.	.	.	.	.	.
2	61010117	ENSSSCG00000013856	T	.	.	.	.	.	.	.	.	.	.	.	.	C	99	23	Y	C	99	38	Y
2	60623841	ENSSSCG00000013862	G	.	.	.	.	.	.	.	.	.	.	.	.	C	54	8	S	C	69	12	S
2	60316372	ENSSSCG00000013867	G	.	.	.	.	.	.	.	.	.	.	.	.	A	25	5	R	A	99	14	R
2	59993449	ENSSSCG00000013870	A	.	.	.	.	.	.	.	.	.	.	.	.	G	99	11	R	G	99	20	R
2	59993755	ENSSSCG00000013870	G	.	.	.	.	.	.	.	.	.	.	.	.	A	28	10	R	A	30	7	R
2	60008126	ENSSSCG00000013870	T	.	.	.	.	.	.	.	.	.	.	.	.	C	57	5	Y	C	99	8	Y
2	60050279	ENSSSCG00000013870	A	.	.	.	.	.	.	.	.	.	.	.	.	G	89	8	R	G	99	16	R
2	60107341	ENSSSCG00000013873	A	.	.	.	.	.	.	.	.	.	.	.	.	C	21	5	C	C	33	6	C
2	60076390	ENSSSCG00000013876	A	.	.	.	.	.	.	.	.	.	.	.	.	G	99	48	R	G	99	59	R
2	59786844	ENSSSCG00000013878	C	T	99	62	Y	T	99	56	Y	T	99	42	Y	.	.	.	.	.	.	.	.
2	59463004	ENSSSCG00000013889	T	.	.	.	.	.	.	.	.	.	.	.	.	C	77	9	Y	C	57	11	C
2	59059949	ENSSSCG00000013906	C	T	99	35	Y	T	39	14	Y	T	88	18	Y	.	.	.	.	.	.	.	.
2	59068338	ENSSSCG00000013908	G	A	99	76	R	A	99	37	R	A	99	71	R	.	.	.	.	.	.	.	.
2	59068354	ENSSSCG00000013908	G	A	99	80	R	A	99	40	R	A	99	63	R	.	.	.	.	.	.	.	.
2	56462727	ENSSSCG00000013958	A	G	99	76	R	G	99	73	R	G	99	84	R	.	.	.	.	.	.	.	.
2	80362090	ENSSSCG00000014017	A	.	.	.	.	.	.	.	.	.	.	.	.	G	99	40	R	G	99	28	G
2	81799737	ENSSSCG00000014030	G	A	99	91	R	A	99	34	R	A	99	68	R	.	.	.	.	.	.	.	.
2	83066940	ENSSSCG00000014058	C	T	63	11	T	T	70	6	Y	T	99	17	Y	.	.	.	.	.	.	.	.
2	84269660	ENSSSCG00000014071	T	.	.	.	.	.	.	.	.	.	.	.	.	C	33	7	C	C	57	11	C
2	85989507	ENSSSCG00000014080	G	.	.	.	.	.	.	.	.	.	.	.	.	A	99	17	R	A	63	16	R
2	85989526	ENSSSCG00000014080	G	.	.	.	.	.	.	.	.	.	.	.	.	A	99	20	R	A	99	21	R
2	96864442	ENSSSCG00000014145	G	A	99	94	R	A	99	51	R	A	99	75	R	.	.	.	.	.	.	.	.
2	105833905	ENSSSCG00000014165	C	.	.	.	.	.	.	.	.	.	.	.	.	T	33	6	Y	T	33	9	T
2	107039297	ENSSSCG00000014170	T	.	.	.	.	.	.	.	.	.	.	.	.	C	99	16	Y	C	99	24	Y
2	107271258	ENSSSCG00000014172	G	.	.	.	.	.	.	.	.	.	.	.	.	C	59	11	S	C	87	15	C
2	124612242	ENSSSCG00000014216	A	.	.	.	.	.	.	.	.	.	.	.	.	G	99	13	R	G	39	15	R
2	135014458	ENSSSCG00000014244	C	.	.	.	.	.	.	.	.	.	.	.	.	T	22	10	Y	T	60	16	Y
2	135023026	ENSSSCG00000014244	G	.	.	.	.	.	.	.	.	.	.	.	.	A	99	11	R	A	50	9	R
2	135211058	ENSSSCG00000014249	A	G	99	31	R	G	91	9	R	G	99	13	R	.	.	.	.	.	.	.	.
2	138706923	ENSSSCG00000014264	T	.	.	.	.	.	.	.	.	.	.	.	.	C	57	10	C	C	46	7	Y
2	139029356	ENSSSCG00000014267	A	.	.	.	.	.	.	.	.	.	.	.	.	G	35	8	G	G	41	11	R
2	140656433	ENSSSCG00000014289	C	T	99	33	T	T	87	16	T	T	99	21	T	.	.	.	.	.	.	.	.
2	142444363	ENSSSCG00000014303	G	.	.	.	.	.	.	.	.	.	.	.	.	A	69	12	A	A	99	27	R
2	142565375	ENSSSCG00000014304	G	.	.	.	.	.	.	.	.	.	.	.	.	A	27	5	A	A	82	10	R
2	142464054	ENSSSCG00000014305	T	.	.	.	.	.	.	.	.	.	.	.	.	A	99	21	A	A	99	53	W
2	142573937	ENSSSCG00000014306	A	.	.	.	.	.	.	.	.	.	.	.	.	G	39	7	G	G	51	9	G
2	143878207	ENSSSCG00000014316	G	A	99	18	A	A	36	7	R	A	39	8	A	.	.	.	.	.	.	.	.
2	143900673	ENSSSCG00000014316	A	.	.	.	.	.	.	.	.	.	.	.	.	C	99	47	C	C	92	18	C
2	143901018	ENSSSCG00000014316	C	.	.	.	.	.	.	.	.	.	.	.	.	G	99	45	G	G	80	39	S
2	145913138	ENSSSCG00000014325	C	.	.	.	.	.	.	.	.	.	.	.	.	T	33	6	T	T	51	9	T
2	146188186	ENSSSCG00000014337	C	G	87	15	G	G	69	6	S	G	33	6	G	.	.	.	.	.	.	.	.
2	146619880	ENSSSCG00000014339	G	.	.	.	.	.	.	.	.	.	.	.	.	A	99	18	R	A	75	13	A
2	146621377	ENSSSCG00000014339	A	.	.	.	.	.	.	.	.	.	.	.	.	G	99	16	R	G	99	21	R
2	147169858	ENSSSCG00000014349	C	.	.	.	.	.	.	.	.	.	.	.	.	T	99	71	Y	T	99	72	T
2	147171783	ENSSSCG00000014349	A	.	.	.	.	.	.	.	.	.	.	.	.	G	99	84	R	G	99	84	G
2	147171807	ENSSSCG00000014349	G	.	.	.	.	.	.	.	.	.	.	.	.	A	53	76	R	A	87	58	A
2	147171882	ENSSSCG00000014349	A	.	.	.	.	.	.	.	.	.	.	.	.	G	99	78	R	G	99	33	G
2	147175541	ENSSSCG00000014349	A	.	.	.	.	.	.	.	.	.	.	.	.	G	99	37	R	G	99	50	G
2	147318330	ENSSSCG00000014357	T	.	.	.	.	.	.	.	.	.	.	.	.	C	27	5	C	C	63	12	C
2	147953018	ENSSSCG00000014361	C	.	.	.	.	.	.	.	.	.	.	.	.	T	99	46	Y	T	99	41	T
2	147953028	ENSSSCG00000014361	G	.	.	.	.	.	.	.	.	.	.	.	.	T	99	40	K	T	99	38	K
2	148232110	ENSSSCG00000014364	G	.	.	.	.	.	.	.	.	.	.	.	.	A	42	9	R	A	87	13	R
2	148239506	ENSSSCG00000014364	C	.	.	.	.	.	.	.	.	.	.	.	.	T	99	12	Y	T	79	12	Y
2	148251342	ENSSSCG00000014365	C	.	.	.	.	.	.	.	.	.	.	.	.	T	99	32	Y	T	81	14	T
2	148252339	ENSSSCG00000014365	G	.	.	.	.	.	.	.	.	.	.	.	.	A	99	82	R	A	99	55	R
2	148260523	ENSSSCG00000014366	G	.	.	.	.	.	.	.	.	.	.	.	.	A	45	14	R	A	99	17	A
2	148260844	ENSSSCG00000014366	T	.	.	.	.	.	.	.	.	.	.	.	.	C	99	10	Y	C	27	5	C
2	148261744	ENSSSCG00000014366	G	.	.	.	.	.	.	.	.	.	.	.	.	A	73	13	R	A	99	10	R
2	148299827	ENSSSCG00000014370	T	.	.	.	.	.	.	.	.	.	.	.	.	C	99	13	Y	C	99	18	C
2	148301160	ENSSSCG00000014370	G	.	.	.	.	.	.	.	.	.	.	.	.	A	99	8	R	A	27	7	R
2	148301205	ENSSSCG00000014370	T	.	.	.	.	.	.	.	.	.	.	.	.	C	60	7	Y	C	24	8	Y
2	148302161	ENSSSCG00000014370	G	.	.	.	.	.	.	.	.	.	.	.	.	A	64	7	R	A	69	13	A
2	148311954	ENSSSCG00000014372	A	.	.	.	.	.	.	.	.	.	.	.	.	G	99	44	R	G	99	92	G
2	148322842	ENSSSCG00000014372	G	.	.	.	.	.	.	.	.	.	.	.	.	A	76	19	R	A	99	16	R
2	148327578	ENSSSCG00000014372	G	.	.	.	.	.	.	.	.	.	.	.	.	A	99	28	R	A	92	23	R
2	148327971	ENSSSCG00000014372	T	.	.	.	.	.	.	.	.	.	.	.	.	C	99	21	Y	C	69	12	C
2	148335659	ENSSSCG00000014375	G	.	.	.	.	.	.	.	.	.	.	.	.	T	99	19	K	T	99	28	K
2	148337947	ENSSSCG00000014375	T	.	.	.	.	.	.	.	.	.	.	.	.	C	99	31	Y	C	99	29	C
2	148340517	ENSSSCG00000014375	C	.	.	.	.	.	.	.	.	.	.	.	.	T	99	28	Y	T	99	35	Y
2	149373903	ENSSSCG00000014387	C	.	.	.	.	.	.	.	.	.	.	.	.	T	89	7	Y	T	99	24	T
2	149373926	ENSSSCG00000014387	T	.	.	.	.	.	.	.	.	.	.	.	.	C	99	18	Y	C	99	41	C
2	149429567	ENSSSCG00000014387	C	.	.	.	.	.	.	.	.	.	.	.	.	A	99	48	M	A	99	41	A
2	149433732	ENSSSCG00000014387	A	.	.	.	.	.	.	.	.	.	.	.	.	G	99	22	R	G	93	17	G
2	149433944	ENSSSCG00000014387	A	.	.	.	.	.	.	.	.	.	.	.	.	G	99	22	R	G	99	29	G
2	149434528	ENSSSCG00000014387	T	.	.	.	.	.	.	.	.	.	.	.	.	C	99	24	Y	C	99	45	C
2	149475881	ENSSSCG00000014388	T	.	.	.	.	.	.	.	.	.	.	.	.	C	30	5	Y	C	27	5	C
2	149476092	ENSSSCG00000014388	C	.	.	.	.	.	.	.	.	.	.	.	.	T	99	66	Y	T	87	28	T
2	149480617	ENSSSCG00000014388	G	.	.	.	.	.	.	.	.	.	.	.	.	A	99	55	R	A	99	42	A
2	149481078	ENSSSCG00000014388	A	.	.	.	.	.	.	.	.	.	.	.	.	G	99	50	R	G	99	44	G
2	149494394	ENSSSCG00000014390	G	.	.	.	.	.	.	.	.	.	.	.	.	A	99	28	A	A	87	18	A
2	149494762	ENSSSCG00000014390	A	.	.	.	.	.	.	.	.	.	.	.	.	T	99	25	W	T	87	17	T
2	149496107	ENSSSCG00000014390	G	.	.	.	.	.	.	.	.	.	.	.	.	A	99	27	R	A	99	25	A
2	149497349	ENSSSCG00000014390	G	.	.	.	.	.	.	.	.	.	.	.	.	A	99	32	R	A	99	19	A
2	149497786	ENSSSCG00000014390	G	.	.	.	.	.	.	.	.	.	.	.	.	C	99	16	S	C	93	16	C
2	149499769	ENSSSCG00000014390	C	.	.	.	.	.	.	.	.	.	.	.	.	T	99	20	Y	T	99	18	Y
2	149506929	ENSSSCG00000014391	G	.	.	.	.	.	.	.	.	.	.	.	.	T	99	43	K	T	81	15	T
2	149506965	ENSSSCG00000014391	C	.	.	.	.	.	.	.	.	.	.	.	.	T	76	31	Y	T	34	15	Y
2	149507068	ENSSSCG00000014391	G	.	.	.	.	.	.	.	.	.	.	.	.	C	99	33	S	C	84	24	S
2	149507555	ENSSSCG00000014391	A	.	.	.	.	.	.	.	.	.	.	.	.	G	99	45	R	G	99	36	G
2	149507606	ENSSSCG00000014391	C	.	.	.	.	.	.	.	.	.	.	.	.	T	99	66	Y	T	99	51	Y
2	149513129	ENSSSCG00000014391	C	.	.	.	.	.	.	.	.	.	.	.	.	T	30	5	Y	T	54	8	Y
2	149513295	ENSSSCG00000014391	A	.	.	.	.	.	.	.	.	.	.	.	.	G	99	17	R	G	99	29	R
2	149519882	ENSSSCG00000014391	A	.	.	.	.	.	.	.	.	.	.	.	.	G	75	13	G	G	99	19	G
2	149520586	ENSSSCG00000014391	T	.	.	.	.	.	.	.	.	.	.	.	.	C	51	9	C	C	57	10	C
2	149522335	ENSSSCG00000014391	G	.	.	.	.	.	.	.	.	.	.	.	.	A	99	33	R	A	99	29	R
2	149522473	ENSSSCG00000014391	A	.	.	.	.	.	.	.	.	.	.	.	.	G	99	20	G	G	99	18	G
2	149522816	ENSSSCG00000014391	G	.	.	.	.	.	.	.	.	.	.	.	.	A	94	20	R	A	99	18	R
2	149522973	ENSSSCG00000014391	G	.	.	.	.	.	.	.	.	.	.	.	.	A	49	19	R	A	99	19	R
2	149523015	ENSSSCG00000014391	C	.	.	.	.	.	.	.	.	.	.	.	.	T	28	12	Y	T	99	20	Y
2	149523891	ENSSSCG00000014391	C	.	.	.	.	.	.	.	.	.	.	.	.	T	45	8	T	T	69	14	T
2	149528070	ENSSSCG00000014391	A	.	.	.	.	.	.	.	.	.	.	.	.	G	81	14	G	G	51	9	G
2	149528121	ENSSSCG00000014391	C	.	.	.	.	.	.	.	.	.	.	.	.	G	69	16	G	G	69	13	G
2	149805957	ENSSSCG00000014393	T	.	.	.	.	.	.	.	.	.	.	.	.	C	21	6	C	C	27	5	C
2	149806710	ENSSSCG00000014393	C	.	.	.	.	.	.	.	.	.	.	.	.	T	39	7	T	T	95	21	Y
2	149806744	ENSSSCG00000014393	A	.	.	.	.	.	.	.	.	.	.	.	.	G	39	7	G	G	30	20	R
2	149796180	ENSSSCG00000014394	A	.	.	.	.	.	.	.	.	.	.	.	.	T	21	5	T	T	45	8	T
2	149796517	ENSSSCG00000014394	C	.	.	.	.	.	.	.	.	.	.	.	.	T	46	6	Y	T	72	21	Y
2	149796696	ENSSSCG00000014394	A	.	.	.	.	.	.	.	.	.	.	.	.	G	87	15	G	G	99	27	G
2	149796705	ENSSSCG00000014394	C	.	.	.	.	.	.	.	.	.	.	.	.	G	93	18	G	G	99	27	G
2	149796939	ENSSSCG00000014394	T	.	.	.	.	.	.	.	.	.	.	.	.	C	45	9	C	C	21	18	Y
2	149732357	ENSSSCG00000014396	T	.	.	.	.	.	.	.	.	.	.	.	.	C	75	14	C	C	33	6	C
2	149732544	ENSSSCG00000014396	C	.	.	.	.	.	.	.	.	.	.	.	.	T	58	8	Y	T	51	10	T
2	149735153	ENSSSCG00000014396	G	.	.	.	.	.	.	.	.	.	.	.	.	A	50	5	R	A	99	18	R
2	149745241	ENSSSCG00000014396	T	.	.	.	.	.	.	.	.	.	.	.	.	C	81	15	C	C	51	9	C
2	149747132	ENSSSCG00000014396	T	.	.	.	.	.	.	.	.	.	.	.	.	C	99	31	C	C	99	21	Y
2	150870184	ENSSSCG00000014399	A	.	.	.	.	.	.	.	.	.	.	.	.	G	33	7	G	G	21	5	G
2	154075357	ENSSSCG00000014409	T	.	.	.	.	.	.	.	.	.	.	.	.	G	51	9	G	G	75	13	G
2	156394184	ENSSSCG00000014427	G	.	.	.	.	.	.	.	.	.	.	.	.	A	39	7	A	A	63	11	A
2	156403399	ENSSSCG00000014427	A	.	.	.	.	.	.	.	.	.	.	.	.	G	69	12	G	G	99	18	G
2	157301996	ENSSSCG00000014433	A	.	.	.	.	.	.	.	.	.	.	.	.	G	93	18	G	G	99	17	G
2	157427963	ENSSSCG00000014435	T	.	.	.	.	.	.	.	.	.	.	.	.	C	26	5	C	C	54	42	Y
2	157846431	ENSSSCG00000014440	C	T	99	35	Y	T	99	12	Y	T	99	16	Y	.	.	.	.	.	.	.	.
2	157858494	ENSSSCG00000014441	A	.	.	.	.	.	.	.	.	.	.	.	.	G	45	8	G	G	75	13	G
2	157954822	ENSSSCG00000014442	G	.	.	.	.	.	.	.	.	.	.	.	.	C	39	8	C	C	63	15	S
2	162155995	ENSSSCG00000014559;ENSSSCG00000014564	T	C	99	51	C	C	99	37	C	C	99	50	C	.	.	.	.	.	.	.	.
2	162163126	ENSSSCG00000014559;ENSSSCG00000014564	A	.	.	.	.	.	.	.	.	.	.	.	.	G	99	68	R	G	99	58	G
2	162119823	ENSSSCG00000014562;ENSSSCG00000014564	G	A	58	8	R	A	33	6	A	A	99	10	R	.	.	.	.	.	.	.	.
2	162120485	ENSSSCG00000014562;ENSSSCG00000014564	C	.	.	.	.	.	.	.	.	.	.	.	.	T	43	66	Y	T	99	23	T
2	162123661	ENSSSCG00000014562;ENSSSCG00000014564	G	.	.	.	.	.	.	.	.	.	.	.	.	A	53	34	R	A	99	20	A
2	162123808	ENSSSCG00000014562;ENSSSCG00000014564	G	.	.	.	.	.	.	.	.	.	.	.	.	C	99	29	S	C	87	15	C
2	162124827	ENSSSCG00000014562;ENSSSCG00000014564	T	.	.	.	.	.	.	.	.	.	.	.	.	C	86	11	Y	C	33	6	C
2	162196773	ENSSSCG00000014564	C	.	.	.	.	.	.	.	.	.	.	.	.	T	99	29	Y	T	99	30	T
2	162197057	ENSSSCG00000014564	A	.	.	.	.	.	.	.	.	.	.	.	.	G	99	36	R	G	45	23	G
2	162197187	ENSSSCG00000014564	A	.	.	.	.	.	.	.	.	.	.	.	.	G	99	52	R	G	99	39	G
2	162197396	ENSSSCG00000014564	G	A	99	17	A	A	69	6	R	A	99	26	R	.	.	.	.	.	.	.	.
2	162097179	ENSSSCG00000014565	C	T	99	66	T	T	99	36	T	T	99	47	Y	.	.	.	.	.	.	.	.
2	5904981	ENSSSCG00000020737	C	T	99	95	T	T	99	31	T	T	99	50	T	.	.	.	.	.	.	.	.
2	12197329	ENSSSCG00000021176	A	.	.	.	.	.	.	.	.	.	.	.	.	G	27	5	G	G	99	54	R
2	12241780	ENSSSCG00000021176	A	.	.	.	.	.	.	.	.	.	.	.	.	G	33	6	G	G	99	81	R
2	12242417	ENSSSCG00000021176	A	.	.	.	.	.	.	.	.	.	.	.	.	G	33	5	R	G	99	56	R
2	12242715	ENSSSCG00000021176	A	.	.	.	.	.	.	.	.	.	.	.	.	G	35	14	R	G	99	60	R
2	12242842	ENSSSCG00000021176	A	.	.	.	.	.	.	.	.	.	.	.	.	G	33	6	G	G	99	62	R
2	48078466	ENSSSCG00000021317	T	.	.	.	.	.	.	.	.	.	.	.	.	C	99	25	C	C	99	49	C
2	4840038	ENSSSCG00000021340	T	.	.	.	.	.	.	.	.	.	.	.	.	C	45	29	C	C	51	28	C
2	7013910	ENSSSCG00000021620;ENSSSCG00000028806	A	.	.	.	.	.	.	.	.	.	.	.	.	C	56	7	M	C	99	19	M
2	7022874	ENSSSCG00000021620;ENSSSCG00000028806	A	.	.	.	.	.	.	.	.	.	.	.	.	G	99	19	G	G	99	31	R
2	10781598	ENSSSCG00000021812	C	.	.	.	.	.	.	.	.	.	.	.	.	A	63	11	A	A	79	10	M
2	10781634	ENSSSCG00000021812	G	.	.	.	.	.	.	.	.	.	.	.	.	A	62	11	R	A	99	9	R
2	4816264	ENSSSCG00000021891	A	.	.	.	.	.	.	.	.	.	.	.	.	G	45	8	G	G	41	6	R
2	4816313	ENSSSCG00000021891	G	.	.	.	.	.	.	.	.	.	.	.	.	A	81	17	A	A	75	9	R
2	4816391	ENSSSCG00000021891	T	.	.	.	.	.	.	.	.	.	.	.	.	C	99	19	C	C	99	12	Y
2	4816439	ENSSSCG00000021891	A	.	.	.	.	.	.	.	.	.	.	.	.	G	51	9	G	G	66	10	R
2	121506654	ENSSSCG00000022048	A	G	99	23	R	G	89	8	R	G	99	22	R	.	.	.	.	.	.	.	.
2	121507103	ENSSSCG00000022048	G	A	99	24	R	A	74	14	R	A	73	14	R	.	.	.	.	.	.	.	.
2	75247197	ENSSSCG00000022066	T	A	46	14	W	A	96	19	W	A	90	15	W	.	.	.	.	.	.	.	.
2	75254680	ENSSSCG00000022066	A	.	.	.	.	.	.	.	.	.	.	.	.	G	33	6	G	G	99	19	G
2	77894920	ENSSSCG00000022265	T	.	.	.	.	.	.	.	.	.	.	.	.	C	99	66	Y	C	99	66	Y
2	8472471	ENSSSCG00000022685	A	.	.	.	.	.	.	.	.	.	.	.	.	G	51	10	G	G	33	7	G
2	7282780	ENSSSCG00000022687	A	.	.	.	.	.	.	.	.	.	.	.	.	C	99	22	C	C	99	41	M
2	4238442	ENSSSCG00000022726	G	.	.	.	.	.	.	.	.	.	.	.	.	A	39	8	A	A	54	7	R
2	77623725	ENSSSCG00000023121	A	.	.	.	.	.	.	.	.	.	.	.	.	G	81	14	R	G	39	7	G
2	77635095	ENSSSCG00000023121	G	.	.	.	.	.	.	.	.	.	.	.	.	A	33	6	A	A	51	9	A
2	107547884	ENSSSCG00000023396	C	.	.	.	.	.	.	.	.	.	.	.	.	T	38	7	T	T	99	18	T
2	15633463	ENSSSCG00000023709	A	.	.	.	.	.	.	.	.	.	.	.	.	T	99	25	W	T	99	20	W
2	15633547	ENSSSCG00000023709	A	.	.	.	.	.	.	.	.	.	.	.	.	C	80	39	M	C	99	34	M
2	15634033	ENSSSCG00000023709	T	.	.	.	.	.	.	.	.	.	.	.	.	A	99	29	W	A	99	32	W
2	6399306	ENSSSCG00000023890	A	.	.	.	.	.	.	.	.	.	.	.	.	G	39	7	G	G	63	11	G
2	6410234	ENSSSCG00000023890	T	.	.	.	.	.	.	.	.	.	.	.	.	C	70	27	Y	C	21	5	C
2	61728836	ENSSSCG00000024211	T	C	99	94	Y	C	99	54	Y	C	99	55	Y	.	.	.	.	.	.	.	.
2	77459656	ENSSSCG00000024672	A	.	.	.	.	.	.	.	.	.	.	.	.	G	34	6	R	G	99	28	R
2	29777250	ENSSSCG00000024791	T	.	.	.	.	.	.	.	.	.	.	.	.	C	85	52	C	C	33	27	Y
2	71173885	ENSSSCG00000024810	A	.	.	.	.	.	.	.	.	.	.	.	.	G	99	22	R	G	99	10	R
2	71174065	ENSSSCG00000024810	T	.	.	.	.	.	.	.	.	.	.	.	.	C	28	64	Y	C	99	53	Y
2	71174614	ENSSSCG00000024810	T	.	.	.	.	.	.	.	.	.	.	.	.	G	99	48	K	G	99	53	K
2	71176383	ENSSSCG00000024810	C	.	.	.	.	.	.	.	.	.	.	.	.	T	51	11	Y	T	31	7	Y
2	162311715	ENSSSCG00000025023	C	.	.	.	.	.	.	.	.	.	.	.	.	G	57	10	G	G	27	5	G
2	162315038	ENSSSCG00000025023	G	.	.	.	.	.	.	.	.	.	.	.	.	A	23	48	A	A	99	32	A
2	104929103	ENSSSCG00000025286	T	.	.	.	.	.	.	.	.	.	.	.	.	C	75	18	Y	C	69	12	C
2	142687340	ENSSSCG00000026106	C	.	.	.	.	.	.	.	.	.	.	.	.	T	45	11	T	T	99	31	Y
2	147425987	ENSSSCG00000026374	T	.	.	.	.	.	.	.	.	.	.	.	.	C	99	71	Y	C	99	87	C
2	142608506	ENSSSCG00000026644	A	.	.	.	.	.	.	.	.	.	.	.	.	G	39	7	G	G	63	8	R
2	142624876	ENSSSCG00000026644	A	.	.	.	.	.	.	.	.	.	.	.	.	C	45	8	C	C	44	18	M
2	5411051	ENSSSCG00000027334	G	.	.	.	.	.	.	.	.	.	.	.	.	A	63	6	R	A	99	10	R
2	9237693	ENSSSCG00000027538	G	.	.	.	.	.	.	.	.	.	.	.	.	A	99	17	A	A	87	15	A
2	77644712	ENSSSCG00000027565	T	.	.	.	.	.	.	.	.	.	.	.	.	C	33	6	C	C	33	6	C
2	77645857	ENSSSCG00000027565	C	.	.	.	.	.	.	.	.	.	.	.	.	T	81	14	T	T	39	7	T
2	73725892	ENSSSCG00000027953	A	.	.	.	.	.	.	.	.	.	.	.	.	G	99	22	R	G	48	8	R
2	73726209	ENSSSCG00000027953	C	.	.	.	.	.	.	.	.	.	.	.	.	T	99	38	Y	T	50	10	Y
2	73726215	ENSSSCG00000027953	G	.	.	.	.	.	.	.	.	.	.	.	.	A	99	37	R	A	51	13	R
2	73726403	ENSSSCG00000027953	C	.	.	.	.	.	.	.	.	.	.	.	.	T	99	45	Y	T	53	8	Y
2	73726641	ENSSSCG00000027953	T	.	.	.	.	.	.	.	.	.	.	.	.	C	99	49	Y	C	57	13	Y
2	3968745	ENSSSCG00000027956	T	.	.	.	.	.	.	.	.	.	.	.	.	C	99	31	C	C	99	24	Y
2	3969222	ENSSSCG00000027956	G	.	.	.	.	.	.	.	.	.	.	.	.	A	87	15	A	A	49	14	R
2	3969329	ENSSSCG00000027956	C	.	.	.	.	.	.	.	.	.	.	.	.	T	99	27	T	T	41	5	Y
2	3969450	ENSSSCG00000027956	G	.	.	.	.	.	.	.	.	.	.	.	.	C	99	23	C	C	99	25	S
2	3970539	ENSSSCG00000027956	A	.	.	.	.	.	.	.	.	.	.	.	.	G	99	29	G	G	99	32	R
2	3970707	ENSSSCG00000027956	C	.	.	.	.	.	.	.	.	.	.	.	.	A	51	9	A	A	92	11	M
2	3970716	ENSSSCG00000027956	C	.	.	.	.	.	.	.	.	.	.	.	.	T	57	10	T	T	95	10	Y
2	3970771	ENSSSCG00000027956	G	.	.	.	.	.	.	.	.	.	.	.	.	A	99	21	R	A	99	13	R
2	3972740	ENSSSCG00000027956	G	.	.	.	.	.	.	.	.	.	.	.	.	T	99	28	T	T	58	21	K
2	3972870	ENSSSCG00000027956	T	.	.	.	.	.	.	.	.	.	.	.	.	C	69	13	C	C	99	14	Y
2	76714727	ENSSSCG00000028363	A	.	.	.	.	.	.	.	.	.	.	.	.	C	50	5	M	C	27	5	C
2	3531901	ENSSSCG00000028501	T	.	.	.	.	.	.	.	.	.	.	.	.	C	99	11	Y	C	57	12	Y
2	3531997	ENSSSCG00000028501	C	.	.	.	.	.	.	.	.	.	.	.	.	T	86	17	Y	T	88	10	Y
2	88972489	ENSSSCG00000028536	C	T	99	19	Y	T	99	10	Y	T	99	14	Y	.	.	.	.	.	.	.	.
2	9245137	ENSSSCG00000028696	G	.	.	.	.	.	.	.	.	.	.	.	.	A	99	26	R	A	99	45	R
2	9245165	ENSSSCG00000028696	G	.	.	.	.	.	.	.	.	.	.	.	.	A	99	23	R	A	99	39	R
2	10170595	ENSSSCG00000028762	T	.	.	.	.	.	.	.	.	.	.	.	.	C	42	5	Y	C	55	6	Y
2	148359079	ENSSSCG00000029158	A	.	.	.	.	.	.	.	.	.	.	.	.	G	99	85	R	G	99	86	G
2	83138635	ENSSSCG00000029179	T	G	99	58	G	G	99	18	G	G	76	23	K	.	.	.	.	.	.	.	.
2	83139633	ENSSSCG00000029179	G	T	99	38	T	T	69	12	T	T	60	20	K	.	.	.	.	.	.	.	.
2	147108645	ENSSSCG00000029239	C	T	99	85	T	T	99	60	Y	T	99	45	T	.	.	.	.	.	.	.	.
2	147108677	ENSSSCG00000029239	C	T	99	75	T	T	99	37	Y	T	99	45	T	.	.	.	.	.	.	.	.
2	19259142	ENSSSCG00000029521	C	T	99	76	T	T	97	14	Y	T	99	45	T	.	.	.	.	.	.	.	.
2	83141407	ENSSSCG00000029577	G	A	99	19	A	A	33	6	A	A	99	14	R	.	.	.	.	.	.	.	.
2	4021605	ENSSSCG00000029637	T	.	.	.	.	.	.	.	.	.	.	.	.	C	99	79	C	C	99	51	Y
2	4022551	ENSSSCG00000029637	A	.	.	.	.	.	.	.	.	.	.	.	.	G	99	32	G	G	61	20	R
2	4023162	ENSSSCG00000029637	A	.	.	.	.	.	.	.	.	.	.	.	.	G	99	24	G	G	86	25	R
2	325678	ENSSSCG00000029723	T	.	.	.	.	.	.	.	.	.	.	.	.	C	99	25	Y	C	51	9	C
2	73810358	ENSSSCG00000030010	C	.	.	.	.	.	.	.	.	.	.	.	.	G	82	95	S	G	94	59	S
2	77677435	ENSSSCG00000030042	A	.	.	.	.	.	.	.	.	.	.	.	.	G	99	33	G	G	99	29	G
2	55191470	ENSSSCG00000030672	T	.	.	.	.	.	.	.	.	.	.	.	.	C	27	5	C	C	27	5	C
2	142044150	ENSSSCG00000030680	G	.	.	.	.	.	.	.	.	.	.	.	.	T	63	12	T	T	99	20	T
2	142055344	ENSSSCG00000030680	T	A	27	5	A	A	27	5	A	A	21	6	A	.	.	.	.	.	.	.	.
2	142071354	ENSSSCG00000030680	G	.	.	.	.	.	.	.	.	.	.	.	.	A	99	37	A	A	31	5	R
2	142071373	ENSSSCG00000030680	C	G	51	9	G	G	45	8	G	G	45	8	G	.	.	.	.	.	.	.	.
2	70439155	ENSSSCG00000030693	T	.	.	.	.	.	.	.	.	.	.	.	.	C	45	10	C	C	20	5	C
2	7348033	intergenic	G	.	.	.	.	.	.	.	.	.	.	.	.	A	99	71	R	A	99	67	R
2	65058330	intergenic	C	.	.	.	.	.	.	.	.	.	.	.	.	T	21	5	T	T	99	33	T
2	6937289	intergenic	T	.	.	.	.	.	.	.	.	.	.	.	.	C	39	9	C	C	27	5	C
2	3475509	intergenic	G	.	.	.	.	.	.	.	.	.	.	.	.	A	69	13	A	A	99	10	R
2	137453640	intergenic	C	.	.	.	.	.	.	.	.	.	.	.	.	T	69	13	T	T	49	11	Y
2	58729782	intergenic	C	.	.	.	.	.	.	.	.	.	.	.	.	T	27	6	T	T	27	5	T
2	5886277	intergenic	C	A	46	18	M	A	32	6	A	A	59	12	A	.	.	.	.	.	.	.	.
2	147060296	intergenic	C	.	.	.	.	.	.	.	.	.	.	.	.	T	73	23	Y	T	99	51	T
2	146139937	intergenic	G	.	.	.	.	.	.	.	.	.	.	.	.	C	45	9	C	C	81	17	C
2	18926145	intergenic	T	C	99	70	C	C	99	44	Y	C	99	51	C	.	.	.	.	.	.	.	.
2	47824281	intergenic	T	.	.	.	.	.	.	.	.	.	.	.	.	C	93	17	C	C	28	7	Y
2	65582910	intergenic	G	.	.	.	.	.	.	.	.	.	.	.	.	T	99	62	K	T	93	43	K
2	64917927	intergenic	C	.	.	.	.	.	.	.	.	.	.	.	.	T	63	12	T	T	99	41	T
2	77823318	intergenic	T	.	.	.	.	.	.	.	.	.	.	.	.	G	39	15	G	G	69	14	G
2	65058152	intergenic	G	.	.	.	.	.	.	.	.	.	.	.	.	C	39	7	C	C	99	25	C
2	5807654	intergenic	C	A	99	54	A	A	99	45	A	A	99	53	A	.	.	.	.	.	.	.	.
2	72178283	intergenic	C	.	.	.	.	.	.	.	.	.	.	.	.	T	99	79	Y	T	99	88	Y
2	147018286	intergenic	C	.	.	.	.	.	.	.	.	.	.	.	.	G	99	15	S	G	99	20	S
2	147025001	intergenic	T	.	.	.	.	.	.	.	.	.	.	.	.	G	61	9	K	G	63	12	G
2	120634516	intergenic	A	.	.	.	.	.	.	.	.	.	.	.	.	G	45	8	G	G	21	5	G
2	157304300	intergenic	A	.	.	.	.	.	.	.	.	.	.	.	.	G	45	8	G	G	39	8	G
2	8586047	intergenic	C	T	99	24	Y	T	78	14	Y	T	81	14	T	.	.	.	.	.	.	.	.
2	128558665	intergenic	T	.	.	.	.	.	.	.	.	.	.	.	.	C	63	11	C	C	97	7	Y
2	11864157	intergenic	T	.	.	.	.	.	.	.	.	.	.	.	.	C	27	6	C	C	70	14	Y
2	142583948	intergenic	A	.	.	.	.	.	.	.	.	.	.	.	.	G	39	7	G	G	56	9	R
2	851473	intergenic	T	.	.	.	.	.	.	.	.	.	.	.	.	C	39	8	C	C	26	5	C
2	147060342	intergenic	T	.	.	.	.	.	.	.	.	.	.	.	.	G	74	15	K	G	99	36	G
2	157303265	intergenic	G	.	.	.	.	.	.	.	.	.	.	.	.	A	63	12	A	A	45	8	A
2	3476278	intergenic	A	.	.	.	.	.	.	.	.	.	.	.	.	G	57	10	G	G	46	7	R
2	73690761	intergenic	A	.	.	.	.	.	.	.	.	.	.	.	.	G	99	57	R	G	90	23	R
2	67493037	intergenic	G	.	.	.	.	.	.	.	.	.	.	.	.	A	63	14	A	A	33	9	A
2	6190269	intergenic	G	.	.	.	.	.	.	.	.	.	.	.	.	A	21	5	A	A	27	5	A
2	156405729	intergenic	A	.	.	.	.	.	.	.	.	.	.	.	.	G	39	9	G	G	87	16	G
2	18925716	intergenic	C	.	.	.	.	.	.	.	.	.	.	.	.	T	99	92	Y	T	99	51	Y
2	148354058	intergenic	C	.	.	.	.	.	.	.	.	.	.	.	.	T	88	12	Y	T	45	11	T
2	59061487	intergenic	A	G	91	14	R	G	97	13	R	G	99	15	R	.	.	.	.	.	.	.	.
2	65057799	intergenic	A	.	.	.	.	.	.	.	.	.	.	.	.	G	99	22	G	G	99	41	G
2	60665670	intergenic	T	.	.	.	.	.	.	.	.	.	.	.	.	C	62	29	Y	C	99	25	Y
2	149360766	intergenic	C	.	.	.	.	.	.	.	.	.	.	.	.	T	99	47	Y	T	81	15	T
2	148291161	intergenic	A	.	.	.	.	.	.	.	.	.	.	.	.	C	99	19	M	C	30	6	M
2	12987008	intergenic	C	.	.	.	.	.	.	.	.	.	.	.	.	A	96	10	M	A	33	11	M
2	11864069	intergenic	G	.	.	.	.	.	.	.	.	.	.	.	.	C	39	9	C	C	39	9	C
2	7559366	intergenic	G	.	.	.	.	.	.	.	.	.	.	.	.	A	99	53	R	A	99	75	R
2	73180258	intergenic	T	.	.	.	.	.	.	.	.	.	.	.	.	C	51	14	Y	C	99	22	Y
2	73691066	intergenic	C	.	.	.	.	.	.	.	.	.	.	.	.	T	87	15	Y	T	94	19	Y
2	9245673	intergenic	G	.	.	.	.	.	.	.	.	.	.	.	.	A	39	7	A	A	69	12	A
2	72755872	intergenic	T	.	.	.	.	.	.	.	.	.	.	.	.	C	99	66	Y	C	99	56	Y
2	65060134	intergenic	G	.	.	.	.	.	.	.	.	.	.	.	.	A	99	8	R	A	79	11	R
2	65057429	intergenic	G	.	.	.	.	.	.	.	.	.	.	.	.	A	90	11	R	A	99	11	R
2	60904742	intergenic	C	.	.	.	.	.	.	.	.	.	.	.	.	A	51	9	A	A	59	6	M
2	72178445	intergenic	G	.	.	.	.	.	.	.	.	.	.	.	.	T	99	52	K	T	99	75	K
2	157285686	intergenic	C	.	.	.	.	.	.	.	.	.	.	.	.	T	63	11	T	T	57	10	T
2	148293769	intergenic	T	.	.	.	.	.	.	.	.	.	.	.	.	C	30	5	Y	C	27	5	C
2	12862788	intergenic	G	A	99	68	A	A	99	24	A	A	99	29	A	.	.	.	.	.	.	.	.
2	149149790	intergenic	C	.	.	.	.	.	.	.	.	.	.	.	.	T	99	22	Y	T	99	32	T
2	18925710	intergenic	C	.	.	.	.	.	.	.	.	.	.	.	.	A	99	99	M	A	99	55	M
2	47824482	intergenic	G	.	.	.	.	.	.	.	.	.	.	.	.	A	99	52	R	A	88	18	R
2	65150332	intergenic	A	.	.	.	.	.	.	.	.	.	.	.	.	T	57	8	W	T	63	6	W
2	162072853	intergenic	A	.	.	.	.	.	.	.	.	.	.	.	.	G	33	6	G	G	99	25	G
2	146629885	intergenic	C	.	.	.	.	.	.	.	.	.	.	.	.	T	99	18	Y	T	87	16	T
2	65060018	intergenic	G	.	.	.	.	.	.	.	.	.	.	.	.	A	30	8	R	A	62	6	R
2	71163275	intergenic	A	.	.	.	.	.	.	.	.	.	.	.	.	G	99	17	R	G	99	14	R
2	162352914	intergenic	C	.	.	.	.	.	.	.	.	.	.	.	.	A	33	7	A	A	53	9	M
2	66316385	intergenic	C	.	.	.	.	.	.	.	.	.	.	.	.	A	98	17	M	A	99	34	M
2	120823664	intergenic	A	.	.	.	.	.	.	.	.	.	.	.	.	G	27	5	G	G	83	20	R
2	156405696	intergenic	G	.	.	.	.	.	.	.	.	.	.	.	.	A	39	7	A	A	69	12	A
2	7350019	intergenic	C	.	.	.	.	.	.	.	.	.	.	.	.	T	84	29	Y	T	99	17	Y
2	147954814	intergenic	A	.	.	.	.	.	.	.	.	.	.	.	.	C	99	100	M	C	99	76	M
2	1467628	intergenic	T	.	.	.	.	.	.	.	.	.	.	.	.	G	27	5	G	G	69	12	G
2	8586700	intergenic	C	.	.	.	.	.	.	.	.	.	.	.	.	G	30	23	S	G	77	63	S
2	88534519	intergenic	T	.	.	.	.	.	.	.	.	.	.	.	.	C	99	29	Y	C	99	33	C
2	3866898	intergenic	T	A	99	34	A	A	99	23	A	A	99	33	A	.	.	.	.	.	.	.	.
2	5515541	intergenic	G	T	99	57	K	T	99	24	K	T	99	37	K	.	.	.	.	.	.	.	.
2	106309666	intergenic	T	.	.	.	.	.	.	.	.	.	.	.	.	A	56	18	W	A	99	38	A
2	78181588	intergenic	T	.	.	.	.	.	.	.	.	.	.	.	.	G	67	10	K	G	40	12	K
2	18924613	intergenic	A	G	99	38	G	G	95	32	R	G	99	25	G	.	.	.	.	.	.	.	.
2	148268498	intergenic	G	.	.	.	.	.	.	.	.	.	.	.	.	A	44	52	R	A	99	33	A
2	157185993	intergenic	G	.	.	.	.	.	.	.	.	.	.	.	.	A	39	7	A	A	33	7	A
2	12862627	intergenic	C	G	99	68	G	G	99	29	G	G	99	41	S	.	.	.	.	.	.	.	.
2	18926180	intergenic	T	C	99	76	C	C	99	42	Y	C	99	54	C	.	.	.	.	.	.	.	.
2	16086248	intergenic	G	.	.	.	.	.	.	.	.	.	.	.	.	A	68	5	R	A	51	10	R
2	76852959	intergenic	C	.	.	.	.	.	.	.	.	.	.	.	.	T	33	6	T	T	27	6	T
2	65058520	intergenic	C	.	.	.	.	.	.	.	.	.	.	.	.	A	99	15	M	A	99	31	M
2	18925534	intergenic	A	G	99	56	G	G	61	26	R	G	99	29	G	.	.	.	.	.	.	.	.
2	157379401	intergenic	G	.	.	.	.	.	.	.	.	.	.	.	.	T	45	8	T	T	99	26	T
2	137453653	intergenic	C	.	.	.	.	.	.	.	.	.	.	.	.	T	69	12	T	T	93	10	Y
2	65058224	intergenic	A	.	.	.	.	.	.	.	.	.	.	.	.	G	27	6	R	G	99	31	R
2	65060177	intergenic	C	.	.	.	.	.	.	.	.	.	.	.	.	T	99	8	Y	T	99	13	Y
2	12987365	intergenic	C	.	.	.	.	.	.	.	.	.	.	.	.	T	99	44	Y	T	69	45	Y
2	18925563	intergenic	A	G	99	70	G	G	59	30	R	G	99	32	G	.	.	.	.	.	.	.	.
2	12134084	intergenic	T	.	.	.	.	.	.	.	.	.	.	.	.	G	27	6	G	G	59	7	K
2	157185999	intergenic	C	.	.	.	.	.	.	.	.	.	.	.	.	T	39	7	T	T	39	7	T
2	5812354	intergenic	C	.	.	.	.	.	.	.	.	.	.	.	.	A	69	20	M	A	99	60	M
2	75913467	intergenic	C	T	99	73	T	T	99	23	T	T	99	37	T	.	.	.	.	.	.	.	.
2	65057680	intergenic	T	.	.	.	.	.	.	.	.	.	.	.	.	C	93	18	C	C	99	22	C
2	8585675	intergenic	C	.	.	.	.	.	.	.	.	.	.	.	.	T	75	12	Y	T	99	37	Y
2	137453362	intergenic	G	.	.	.	.	.	.	.	.	.	.	.	.	T	55	7	K	T	39	7	T
2	3761515	intergenic	T	G	83	38	K	G	50	23	K	G	99	33	G	.	.	.	.	.	.	.	.
2	96870585	intergenic	T	.	.	.	.	.	.	.	.	.	.	.	.	A	34	5	W	A	21	5	A
2	18925289	intergenic	T	C	99	41	C	C	57	22	Y	C	99	28	C	.	.	.	.	.	.	.	.
2	104129905	intergenic	G	A	99	16	R	A	30	5	R	A	64	13	R	.	.	.	.	.	.	.	.
2	140216882	intergenic	A	.	.	.	.	.	.	.	.	.	.	.	.	G	45	10	G	G	27	6	G
2	6453235	intergenic	A	.	.	.	.	.	.	.	.	.	.	.	.	C	99	29	C	C	45	8	C
2	157379892	intergenic	T	.	.	.	.	.	.	.	.	.	.	.	.	A	93	16	A	A	25	33	A
2	70007234	intergenic	A	.	.	.	.	.	.	.	.	.	.	.	.	G	36	21	R	G	99	25	R
2	3866747	intergenic	C	T	69	13	T	T	33	6	T	T	27	5	T	.	.	.	.	.	.	.	.
2	3804087	intergenic	T	.	.	.	.	.	.	.	.	.	.	.	.	C	21	11	C	C	21	5	C
2	11865235	intergenic	A	.	.	.	.	.	.	.	.	.	.	.	.	G	27	5	G	G	30	16	R
2	3493301	intergenic	C	.	.	.	.	.	.	.	.	.	.	.	.	T	99	22	Y	T	68	9	Y
2	156405960	intergenic	T	.	.	.	.	.	.	.	.	.	.	.	.	C	93	18	C	C	45	10	C
2	157285833	intergenic	G	.	.	.	.	.	.	.	.	.	.	.	.	A	27	5	A	A	27	5	A
2	157185100	intergenic	C	.	.	.	.	.	.	.	.	.	.	.	.	T	99	17	T	T	21	6	T
2	18924808	intergenic	G	A	99	36	A	A	99	40	R	A	99	30	A	.	.	.	.	.	.	.	.
2	120634479	intergenic	G	.	.	.	.	.	.	.	.	.	.	.	.	T	57	10	T	T	33	6	T
2	149363217	intergenic	C	T	99	96	T	T	99	34	Y	T	99	48	T	.	.	.	.	.	.	.	.
2	18925978	intergenic	G	.	.	.	.	.	.	.	.	.	.	.	.	A	99	57	R	A	99	31	R
2	109141284	intergenic	A	G	99	37	R	G	99	26	R	G	63	20	R	.	.	.	.	.	.	.	.
2	5806748	intergenic	A	C	99	64	C	C	99	53	C	C	99	58	C	.	.	.	.	.	.	.	.
2	52025898	intergenic	G	A	27	5	A	A	30	6	R	A	27	5	A	.	.	.	.	.	.	.	.
3	672069	ENSSSCG00000007545	C	.	.	.	.	.	.	.	.	.	.	.	.	T	99	50	Y	T	99	33	Y
3	673549	ENSSSCG00000007545	A	.	.	.	.	.	.	.	.	.	.	.	.	G	39	7	G	G	34	12	R
3	725958	ENSSSCG00000007546	A	.	.	.	.	.	.	.	.	.	.	.	.	C	33	6	C	C	28	8	M
3	726671	ENSSSCG00000007546	T	.	.	.	.	.	.	.	.	.	.	.	.	C	99	28	C	C	99	10	Y
3	726812	ENSSSCG00000007546	T	.	.	.	.	.	.	.	.	.	.	.	.	C	99	44	C	C	99	22	Y
3	693118	ENSSSCG00000007548	C	.	.	.	.	.	.	.	.	.	.	.	.	G	45	11	G	G	27	7	S
3	758490	ENSSSCG00000007550	C	.	.	.	.	.	.	.	.	.	.	.	.	A	99	8	M	A	80	9	M
3	1168711	ENSSSCG00000007556	A	.	.	.	.	.	.	.	.	.	.	.	.	G	99	25	G	G	99	20	R
3	1094299	ENSSSCG00000007558	T	.	.	.	.	.	.	.	.	.	.	.	.	C	93	66	Y	C	61	54	Y
3	1096129	ENSSSCG00000007558	G	.	.	.	.	.	.	.	.	.	.	.	.	A	99	34	A	A	99	20	R
3	1106648	ENSSSCG00000007558	G	.	.	.	.	.	.	.	.	.	.	.	.	C	99	43	C	C	99	28	S
3	2115119	ENSSSCG00000007563	C	.	.	.	.	.	.	.	.	.	.	.	.	T	99	20	T	T	99	14	Y
3	2115719	ENSSSCG00000007563	C	.	.	.	.	.	.	.	.	.	.	.	.	T	45	8	T	T	30	13	Y
3	2195028	ENSSSCG00000007565	C	.	.	.	.	.	.	.	.	.	.	.	.	G	45	8	G	G	80	8	S
3	2195040	ENSSSCG00000007565	G	.	.	.	.	.	.	.	.	.	.	.	.	A	45	8	A	A	98	8	R
3	2285383	ENSSSCG00000007567	G	.	.	.	.	.	.	.	.	.	.	.	.	A	56	7	R	A	27	5	A
3	4258768	ENSSSCG00000007576	C	.	.	.	.	.	.	.	.	.	.	.	.	T	99	27	Y	T	99	18	Y
3	4281921	ENSSSCG00000007577	G	.	.	.	.	.	.	.	.	.	.	.	.	T	99	52	K	T	45	8	T
3	4286711	ENSSSCG00000007577	G	.	.	.	.	.	.	.	.	.	.	.	.	T	99	19	K	T	99	15	K
3	4287444	ENSSSCG00000007577	A	.	.	.	.	.	.	.	.	.	.	.	.	G	99	26	G	G	99	20	G
3	4291715	ENSSSCG00000007577	A	.	.	.	.	.	.	.	.	.	.	.	.	G	69	12	G	G	28	5	R
3	4292420	ENSSSCG00000007577	G	.	.	.	.	.	.	.	.	.	.	.	.	A	46	16	R	A	57	6	R
3	4487244	ENSSSCG00000007580	C	.	.	.	.	.	.	.	.	.	.	.	.	T	99	29	T	T	48	17	Y
3	4517571	ENSSSCG00000007580	G	A	99	32	R	A	89	21	R	A	61	16	R	.	.	.	.	.	.	.	.
3	4517575	ENSSSCG00000007580	T	.	.	.	.	.	.	.	.	.	.	.	.	C	99	57	C	C	99	60	Y
3	4517687	ENSSSCG00000007580	T	.	.	.	.	.	.	.	.	.	.	.	.	A	99	55	A	A	25	37	A
3	4517901	ENSSSCG00000007580	G	.	.	.	.	.	.	.	.	.	.	.	.	A	99	36	R	A	99	43	R
3	4729748	ENSSSCG00000007585	G	.	.	.	.	.	.	.	.	.	.	.	.	A	99	39	R	A	99	49	R
3	4730093	ENSSSCG00000007585	T	.	.	.	.	.	.	.	.	.	.	.	.	C	57	10	C	C	87	8	Y
3	4730969	ENSSSCG00000007585	G	.	.	.	.	.	.	.	.	.	.	.	.	A	21	8	R	A	34	14	R
3	4731877	ENSSSCG00000007585	A	.	.	.	.	.	.	.	.	.	.	.	.	G	21	5	G	G	73	13	R
3	4731962	ENSSSCG00000007585	A	.	.	.	.	.	.	.	.	.	.	.	.	G	39	7	G	G	99	11	R
3	5206445	ENSSSCG00000007590	T	.	.	.	.	.	.	.	.	.	.	.	.	C	99	22	C	C	61	13	Y
3	5153534	ENSSSCG00000007592	T	.	.	.	.	.	.	.	.	.	.	.	.	C	39	7	C	C	99	31	C
3	5153618	ENSSSCG00000007592	T	.	.	.	.	.	.	.	.	.	.	.	.	G	33	6	G	G	99	26	G
3	5153642	ENSSSCG00000007592	T	.	.	.	.	.	.	.	.	.	.	.	.	C	27	5	C	C	99	19	C
3	5153726	ENSSSCG00000007592	A	.	.	.	.	.	.	.	.	.	.	.	.	G	39	7	G	G	75	13	G
3	5166495	ENSSSCG00000007592;ENSSSCG00000024245	C	.	.	.	.	.	.	.	.	.	.	.	.	T	99	38	Y	T	99	44	Y
3	5302797	ENSSSCG00000007596	A	.	.	.	.	.	.	.	.	.	.	.	.	G	69	12	G	G	27	10	R
3	5474779	ENSSSCG00000007601;ENSSSCG00000007602	G	.	.	.	.	.	.	.	.	.	.	.	.	A	99	34	R	A	99	29	R
3	5471149	ENSSSCG00000007602	T	.	.	.	.	.	.	.	.	.	.	.	.	C	69	13	C	C	78	12	Y
3	5471882	ENSSSCG00000007602	G	.	.	.	.	.	.	.	.	.	.	.	.	A	81	15	A	A	70	43	R
3	5472787	ENSSSCG00000007602	T	.	.	.	.	.	.	.	.	.	.	.	.	A	99	29	W	A	99	23	W
3	5474238	ENSSSCG00000007602	G	.	.	.	.	.	.	.	.	.	.	.	.	A	81	23	R	A	52	16	R
3	6078575	ENSSSCG00000007606	G	A	65	15	R	A	57	10	A	A	65	15	R	.	.	.	.	.	.	.	.
3	6080089	ENSSSCG00000007606	A	.	.	.	.	.	.	.	.	.	.	.	.	G	99	17	G	G	99	15	R
3	6434816	ENSSSCG00000007609	G	.	.	.	.	.	.	.	.	.	.	.	.	C	99	39	C	C	99	89	S
3	6673780	ENSSSCG00000007615	G	.	.	.	.	.	.	.	.	.	.	.	.	A	63	11	A	A	52	11	R
3	6679091	ENSSSCG00000007615	A	.	.	.	.	.	.	.	.	.	.	.	.	G	27	5	G	G	99	25	R
3	6679166	ENSSSCG00000007615	C	.	.	.	.	.	.	.	.	.	.	.	.	A	33	6	A	A	86	11	M
3	6581246	ENSSSCG00000007618	G	.	.	.	.	.	.	.	.	.	.	.	.	A	45	8	A	A	99	16	R
3	6581267	ENSSSCG00000007618	G	.	.	.	.	.	.	.	.	.	.	.	.	A	51	9	A	A	99	16	R
3	6581320	ENSSSCG00000007618	G	.	.	.	.	.	.	.	.	.	.	.	.	A	39	7	A	A	57	16	R
3	6581937	ENSSSCG00000007618	C	.	.	.	.	.	.	.	.	.	.	.	.	T	99	20	T	T	56	21	Y
3	6581962	ENSSSCG00000007618	A	C	45	8	C	C	27	5	C	C	39	9	C	.	.	.	.	.	.	.	.
3	6582263	ENSSSCG00000007618	G	.	.	.	.	.	.	.	.	.	.	.	.	A	39	8	A	A	24	7	R
3	6619557	ENSSSCG00000007618	T	.	.	.	.	.	.	.	.	.	.	.	.	C	27	5	C	C	66	7	Y
3	6623114	ENSSSCG00000007618	C	.	.	.	.	.	.	.	.	.	.	.	.	G	99	18	G	G	99	17	S
3	6693379	ENSSSCG00000007622	G	.	.	.	.	.	.	.	.	.	.	.	.	A	75	15	A	A	53	9	R
3	6693693	ENSSSCG00000007622;ENSSSCG00000007623	G	.	.	.	.	.	.	.	.	.	.	.	.	A	99	78	A	A	75	90	R
3	6694045	ENSSSCG00000007622;ENSSSCG00000007623	A	.	.	.	.	.	.	.	.	.	.	.	.	G	33	6	G	G	99	10	R
3	7088729	ENSSSCG00000007637	C	A	66	5	M	A	67	6	M	A	67	6	M	.	.	.	.	.	.	.	.
3	7430727	ENSSSCG00000007644	C	.	.	.	.	.	.	.	.	.	.	.	.	T	99	26	Y	T	59	6	Y
3	7607366	ENSSSCG00000007652;ENSSSCG00000023680	A	.	.	.	.	.	.	.	.	.	.	.	.	G	99	97	G	G	99	72	R
3	7607868	ENSSSCG00000007652;ENSSSCG00000023680	C	.	.	.	.	.	.	.	.	.	.	.	.	T	99	63	T	T	99	64	Y
3	7608120	ENSSSCG00000007652;ENSSSCG00000023680	C	.	.	.	.	.	.	.	.	.	.	.	.	T	99	22	T	T	99	57	Y
3	7608235	ENSSSCG00000007652;ENSSSCG00000023680	G	.	.	.	.	.	.	.	.	.	.	.	.	A	99	22	A	A	99	82	R
3	7608256	ENSSSCG00000007652;ENSSSCG00000023680	C	.	.	.	.	.	.	.	.	.	.	.	.	T	99	28	T	T	84	70	Y
3	7576861	ENSSSCG00000007656	G	A	95	91	R	A	58	28	R	A	99	69	R	.	.	.	.	.	.	.	.
3	7576956	ENSSSCG00000007656	T	C	68	99	Y	C	51	28	Y	C	89	71	Y	.	.	.	.	.	.	.	.
3	7577078	ENSSSCG00000007656	T	C	99	69	C	C	99	27	C	C	99	44	C	.	.	.	.	.	.	.	.
3	7577148	ENSSSCG00000007656	C	A	99	77	M	A	86	34	M	A	99	39	M	.	.	.	.	.	.	.	.
3	7577800	ENSSSCG00000007656	G	.	.	.	.	.	.	.	.	.	.	.	.	T	99	76	T	T	99	89	K
3	7577969	ENSSSCG00000007656	C	T	99	79	T	T	99	27	T	T	99	54	T	.	.	.	.	.	.	.	.
3	7578409	ENSSSCG00000007656	C	.	.	.	.	.	.	.	.	.	.	.	.	T	99	21	T	T	74	33	Y
3	7811638	ENSSSCG00000007664	G	.	.	.	.	.	.	.	.	.	.	.	.	A	75	16	A	A	99	22	R
3	7823431	ENSSSCG00000007664	T	.	.	.	.	.	.	.	.	.	.	.	.	C	51	9	C	C	99	18	Y
3	7826917	ENSSSCG00000007664	G	.	.	.	.	.	.	.	.	.	.	.	.	T	45	8	T	T	99	23	K
3	7827761	ENSSSCG00000007664	C	.	.	.	.	.	.	.	.	.	.	.	.	T	51	9	T	T	99	25	Y
3	7827875	ENSSSCG00000007664	G	.	.	.	.	.	.	.	.	.	.	.	.	A	75	14	A	A	61	25	R
3	7827907	ENSSSCG00000007664	C	.	.	.	.	.	.	.	.	.	.	.	.	G	93	16	G	G	63	28	S
3	7828013	ENSSSCG00000007664	C	.	.	.	.	.	.	.	.	.	.	.	.	T	75	13	T	T	99	37	Y
3	7828199	ENSSSCG00000007664	A	.	.	.	.	.	.	.	.	.	.	.	.	G	99	21	G	G	75	20	R
3	7831033	ENSSSCG00000007664	C	.	.	.	.	.	.	.	.	.	.	.	.	T	99	26	T	T	99	44	Y
3	7832528	ENSSSCG00000007664	G	.	.	.	.	.	.	.	.	.	.	.	.	A	87	15	A	A	99	18	R
3	9480887	ENSSSCG00000007683	T	.	.	.	.	.	.	.	.	.	.	.	.	C	99	55	C	C	99	43	Y
3	9547639	ENSSSCG00000007684	A	.	.	.	.	.	.	.	.	.	.	.	.	G	33	8	G	G	68	17	R
3	9547959	ENSSSCG00000007684	T	.	.	.	.	.	.	.	.	.	.	.	.	C	33	8	C	C	47	12	Y
3	10669064	ENSSSCG00000007713	C	.	.	.	.	.	.	.	.	.	.	.	.	A	99	27	A	A	99	37	M
3	10774518	ENSSSCG00000007717	C	.	.	.	.	.	.	.	.	.	.	.	.	T	87	16	T	T	99	16	Y
3	10775867	ENSSSCG00000007717	C	.	.	.	.	.	.	.	.	.	.	.	.	T	99	28	T	T	68	18	Y
3	10775907	ENSSSCG00000007717	C	.	.	.	.	.	.	.	.	.	.	.	.	T	99	19	T	T	33	13	Y
3	11289239	ENSSSCG00000007720	A	.	.	.	.	.	.	.	.	.	.	.	.	C	39	12	C	C	58	6	M
3	11289579	ENSSSCG00000007720	G	.	.	.	.	.	.	.	.	.	.	.	.	A	27	5	A	A	34	7	R
3	11550121	ENSSSCG00000007722	A	.	.	.	.	.	.	.	.	.	.	.	.	G	99	22	G	G	99	7	R
3	11551396	ENSSSCG00000007722	G	.	.	.	.	.	.	.	.	.	.	.	.	A	99	23	A	A	72	5	R
3	11551710	ENSSSCG00000007722	C	.	.	.	.	.	.	.	.	.	.	.	.	G	27	6	G	G	55	8	S
3	11551716	ENSSSCG00000007722	G	.	.	.	.	.	.	.	.	.	.	.	.	T	33	6	T	T	51	8	K
3	11654767	ENSSSCG00000007723	G	A	99	9	R	A	94	8	R	A	91	8	R	.	.	.	.	.	.	.	.
3	11658574	ENSSSCG00000007723	T	.	.	.	.	.	.	.	.	.	.	.	.	C	99	22	C	C	99	19	Y
3	11667858	ENSSSCG00000007723	C	.	.	.	.	.	.	.	.	.	.	.	.	T	33	6	T	T	62	16	Y
3	16415843	ENSSSCG00000007732	A	.	.	.	.	.	.	.	.	.	.	.	.	G	99	47	R	G	99	28	R
3	16561273	ENSSSCG00000007735	A	.	.	.	.	.	.	.	.	.	.	.	.	G	45	8	G	G	58	8	R
3	16561288	ENSSSCG00000007735	A	.	.	.	.	.	.	.	.	.	.	.	.	G	57	10	G	G	82	9	R
3	16505172	ENSSSCG00000007736	A	.	.	.	.	.	.	.	.	.	.	.	.	G	99	35	R	G	99	49	R
3	16505477	ENSSSCG00000007736	C	.	.	.	.	.	.	.	.	.	.	.	.	T	93	17	T	T	99	29	T
3	16506049	ENSSSCG00000007736	A	.	.	.	.	.	.	.	.	.	.	.	.	G	39	8	G	G	39	7	G
3	16706869	ENSSSCG00000007737	A	.	.	.	.	.	.	.	.	.	.	.	.	G	39	7	G	G	45	8	G
3	16924817	ENSSSCG00000007739	G	.	.	.	.	.	.	.	.	.	.	.	.	C	63	11	C	C	99	47	S
3	16924878	ENSSSCG00000007739	G	.	.	.	.	.	.	.	.	.	.	.	.	A	99	24	A	A	99	47	R
3	16926851	ENSSSCG00000007739	A	.	.	.	.	.	.	.	.	.	.	.	.	G	87	17	G	G	99	30	R
3	16929343	ENSSSCG00000007739	C	.	.	.	.	.	.	.	.	.	.	.	.	T	99	19	T	T	99	38	Y
3	16929490	ENSSSCG00000007739	T	.	.	.	.	.	.	.	.	.	.	.	.	C	99	24	C	C	99	34	Y
3	16933935	ENSSSCG00000007739	T	.	.	.	.	.	.	.	.	.	.	.	.	G	99	44	K	G	99	27	K
3	16934001	ENSSSCG00000007739	A	.	.	.	.	.	.	.	.	.	.	.	.	G	99	33	G	G	99	18	R
3	17083412	ENSSSCG00000007745	T	.	.	.	.	.	.	.	.	.	.	.	.	C	75	14	C	C	66	31	Y
3	17654247	ENSSSCG00000007754	A	.	.	.	.	.	.	.	.	.	.	.	.	G	33	6	G	G	46	12	R
3	17663736	ENSSSCG00000007754	C	.	.	.	.	.	.	.	.	.	.	.	.	T	24	7	Y	T	69	6	Y
3	17565999	ENSSSCG00000007758	T	.	.	.	.	.	.	.	.	.	.	.	.	C	99	46	C	C	99	33	C
3	17508283	ENSSSCG00000007760;ENSSSCG00000007762	G	.	.	.	.	.	.	.	.	.	.	.	.	A	99	45	R	A	99	63	R
3	17508295	ENSSSCG00000007760;ENSSSCG00000007762	C	.	.	.	.	.	.	.	.	.	.	.	.	T	99	46	Y	T	99	63	Y
3	17508474	ENSSSCG00000007760;ENSSSCG00000007762	G	.	.	.	.	.	.	.	.	.	.	.	.	A	99	62	R	A	99	68	R
3	17509676	ENSSSCG00000007760;ENSSSCG00000007762	T	.	.	.	.	.	.	.	.	.	.	.	.	C	51	9	C	C	27	5	C
3	17509780	ENSSSCG00000007760;ENSSSCG00000007762	C	.	.	.	.	.	.	.	.	.	.	.	.	T	21	5	T	T	77	8	Y
3	17509999	ENSSSCG00000007760;ENSSSCG00000007762	C	.	.	.	.	.	.	.	.	.	.	.	.	T	89	51	Y	T	99	57	Y
3	17499286	ENSSSCG00000007762	C	.	.	.	.	.	.	.	.	.	.	.	.	G	99	21	G	G	99	46	G
3	17506432	ENSSSCG00000007762	T	.	.	.	.	.	.	.	.	.	.	.	.	C	99	24	C	C	81	14	C
3	17494786	ENSSSCG00000007763	T	.	.	.	.	.	.	.	.	.	.	.	.	C	99	55	Y	C	99	35	Y
3	17494792	ENSSSCG00000007763	T	.	.	.	.	.	.	.	.	.	.	.	.	C	99	55	Y	C	99	35	Y
3	17496508	ENSSSCG00000007763	C	.	.	.	.	.	.	.	.	.	.	.	.	T	99	35	T	T	99	23	T
3	17496515	ENSSSCG00000007763	C	.	.	.	.	.	.	.	.	.	.	.	.	T	99	35	T	T	99	22	T
3	17753001	ENSSSCG00000007768	G	.	.	.	.	.	.	.	.	.	.	.	.	C	60	18	S	C	42	12	C
3	17761020	ENSSSCG00000007768	T	.	.	.	.	.	.	.	.	.	.	.	.	C	99	58	C	C	99	42	C
3	17812419	ENSSSCG00000007770	T	.	.	.	.	.	.	.	.	.	.	.	.	C	87	15	C	C	99	38	C
3	17813250	ENSSSCG00000007770	A	.	.	.	.	.	.	.	.	.	.	.	.	G	99	27	G	G	99	19	G
3	17813511	ENSSSCG00000007770	G	.	.	.	.	.	.	.	.	.	.	.	.	A	99	39	A	A	83	41	R
3	17813724	ENSSSCG00000007770	T	.	.	.	.	.	.	.	.	.	.	.	.	C	99	37	C	C	99	63	C
3	17952027	ENSSSCG00000007776	C	.	.	.	.	.	.	.	.	.	.	.	.	T	99	92	T	T	99	91	Y
3	17836098	ENSSSCG00000007782	A	.	.	.	.	.	.	.	.	.	.	.	.	G	63	11	G	G	27	5	G
3	18077079	ENSSSCG00000007786	A	.	.	.	.	.	.	.	.	.	.	.	.	G	69	12	G	G	84	18	R
3	18077148	ENSSSCG00000007786	T	.	.	.	.	.	.	.	.	.	.	.	.	C	99	21	C	C	33	15	Y
3	18078740	ENSSSCG00000007786	C	.	.	.	.	.	.	.	.	.	.	.	.	T	75	13	T	T	99	14	Y
3	18082077	ENSSSCG00000007786	T	.	.	.	.	.	.	.	.	.	.	.	.	G	81	14	G	G	64	8	K
3	18088014	ENSSSCG00000007788	C	.	.	.	.	.	.	.	.	.	.	.	.	T	99	43	T	T	99	55	Y
3	18088227	ENSSSCG00000007788	C	.	.	.	.	.	.	.	.	.	.	.	.	T	99	83	T	T	99	52	Y
3	18113135	ENSSSCG00000007789	G	.	.	.	.	.	.	.	.	.	.	.	.	A	63	11	A	A	63	12	A
3	18203878	ENSSSCG00000007790	T	.	.	.	.	.	.	.	.	.	.	.	.	C	99	17	C	C	81	14	C
3	18204542	ENSSSCG00000007790	A	.	.	.	.	.	.	.	.	.	.	.	.	G	99	36	G	G	99	28	G
3	18204584	ENSSSCG00000007790	C	.	.	.	.	.	.	.	.	.	.	.	.	T	99	47	T	T	99	38	T
3	18205705	ENSSSCG00000007790	C	.	.	.	.	.	.	.	.	.	.	.	.	A	99	61	A	A	99	46	A
3	18396950	ENSSSCG00000007791	C	.	.	.	.	.	.	.	.	.	.	.	.	T	75	13	T	T	99	13	Y
3	18398273	ENSSSCG00000007791	T	.	.	.	.	.	.	.	.	.	.	.	.	C	99	47	C	C	99	59	C
3	18400147	ENSSSCG00000007791	T	.	.	.	.	.	.	.	.	.	.	.	.	C	51	10	C	C	57	10	C
3	18400316	ENSSSCG00000007791	C	.	.	.	.	.	.	.	.	.	.	.	.	T	44	5	Y	T	92	18	Y
3	18401408	ENSSSCG00000007791	C	.	.	.	.	.	.	.	.	.	.	.	.	G	78	9	S	G	27	5	G
3	18250810	ENSSSCG00000007794	A	.	.	.	.	.	.	.	.	.	.	.	.	G	69	12	G	G	27	5	G
3	18312266	ENSSSCG00000007796	C	.	.	.	.	.	.	.	.	.	.	.	.	T	57	10	T	T	93	16	T
3	18261635	ENSSSCG00000007797	G	.	.	.	.	.	.	.	.	.	.	.	.	C	51	10	C	C	73	12	S
3	18262208	ENSSSCG00000007797	A	.	.	.	.	.	.	.	.	.	.	.	.	G	69	14	G	G	33	6	G
3	18262746	ENSSSCG00000007797	A	.	.	.	.	.	.	.	.	.	.	.	.	C	99	23	C	C	99	29	C
3	18276987	ENSSSCG00000007797	T	.	.	.	.	.	.	.	.	.	.	.	.	C	99	42	C	C	99	73	Y
3	18279265	ENSSSCG00000007797	T	.	.	.	.	.	.	.	.	.	.	.	.	C	39	9	C	C	27	7	Y
3	18279497	ENSSSCG00000007797	A	.	.	.	.	.	.	.	.	.	.	.	.	G	51	9	G	G	51	9	G
3	18283193	ENSSSCG00000007797	A	.	.	.	.	.	.	.	.	.	.	.	.	G	41	27	G	G	99	36	G
3	18287339	ENSSSCG00000007797	A	.	.	.	.	.	.	.	.	.	.	.	.	G	99	49	G	G	99	93	G
3	18289688	ENSSSCG00000007797	G	.	.	.	.	.	.	.	.	.	.	.	.	A	99	56	A	A	99	83	A
3	18383829	ENSSSCG00000007798	C	.	.	.	.	.	.	.	.	.	.	.	.	T	99	30	T	T	99	37	Y
3	18388436	ENSSSCG00000007798	G	.	.	.	.	.	.	.	.	.	.	.	.	T	99	29	T	T	99	38	K
3	18392991	ENSSSCG00000007798	T	.	.	.	.	.	.	.	.	.	.	.	.	C	99	33	C	C	99	29	C
3	18393881	ENSSSCG00000007798	C	.	.	.	.	.	.	.	.	.	.	.	.	A	99	60	A	A	56	69	M
3	18394244	ENSSSCG00000007798	G	.	.	.	.	.	.	.	.	.	.	.	.	A	87	15	A	A	99	31	R
3	18394315	ENSSSCG00000007798	G	.	.	.	.	.	.	.	.	.	.	.	.	A	99	50	A	A	99	53	R
3	18394562	ENSSSCG00000007798	C	G	99	64	S	G	47	35	S	G	99	34	G	.	.	.	.	.	.	.	.
3	18727888	ENSSSCG00000007804	G	.	.	.	.	.	.	.	.	.	.	.	.	A	99	25	A	A	83	23	R
3	18753899	ENSSSCG00000007806	A	.	.	.	.	.	.	.	.	.	.	.	.	G	99	48	G	G	43	32	R
3	18753958	ENSSSCG00000007806	C	.	.	.	.	.	.	.	.	.	.	.	.	A	99	61	M	A	99	39	M
3	18755412	ENSSSCG00000007806	C	T	99	29	Y	T	99	15	Y	T	99	32	Y	.	.	.	.	.	.	.	.
3	18760786	ENSSSCG00000007806	C	.	.	.	.	.	.	.	.	.	.	.	.	T	99	38	Y	T	99	24	Y
3	18764395	ENSSSCG00000007806	A	G	21	18	G	G	45	12	R	G	99	21	G	.	.	.	.	.	.	.	.
3	18779977	ENSSSCG00000007807	C	.	.	.	.	.	.	.	.	.	.	.	.	T	50	9	Y	T	99	19	Y
3	18786614	ENSSSCG00000007807	C	A	99	25	M	A	88	10	M	A	99	19	A	.	.	.	.	.	.	.	.
3	18787005	ENSSSCG00000007807	C	.	.	.	.	.	.	.	.	.	.	.	.	G	99	17	G	G	99	20	S
3	18787014	ENSSSCG00000007807	T	C	75	10	Y	C	59	6	Y	C	30	5	Y	.	.	.	.	.	.	.	.
3	18816368	ENSSSCG00000007809	T	.	.	.	.	.	.	.	.	.	.	.	.	G	52	12	K	G	99	27	K
3	18823864	ENSSSCG00000007809	C	.	.	.	.	.	.	.	.	.	.	.	.	T	99	45	Y	T	99	29	Y
3	18824253	ENSSSCG00000007809	C	.	.	.	.	.	.	.	.	.	.	.	.	T	99	40	Y	T	99	38	Y
3	18824294	ENSSSCG00000007809	G	C	99	29	S	C	52	9	S	C	44	20	S	.	.	.	.	.	.	.	.
3	18824306	ENSSSCG00000007809	C	T	99	29	Y	T	51	9	Y	T	44	22	Y	.	.	.	.	.	.	.	.
3	18824715	ENSSSCG00000007809	C	T	99	26	Y	T	93	7	Y	T	46	9	Y	.	.	.	.	.	.	.	.
3	18825950	ENSSSCG00000007811	A	G	99	78	G	G	99	46	G	G	99	67	G	.	.	.	.	.	.	.	.
3	18827109	ENSSSCG00000007811	C	A	99	26	M	A	99	16	M	A	99	24	M	.	.	.	.	.	.	.	.
3	18829125	ENSSSCG00000007811	A	.	.	.	.	.	.	.	.	.	.	.	.	G	54	26	R	G	49	6	R
3	19108737	ENSSSCG00000007812	T	C	99	89	C	C	60	29	Y	C	99	40	C	.	.	.	.	.	.	.	.
3	19111263	ENSSSCG00000007812	C	.	.	.	.	.	.	.	.	.	.	.	.	T	69	12	T	T	51	38	Y
3	19111396	ENSSSCG00000007812	G	.	.	.	.	.	.	.	.	.	.	.	.	A	77	22	R	A	69	22	R
3	19111573	ENSSSCG00000007812	C	.	.	.	.	.	.	.	.	.	.	.	.	T	87	15	T	T	87	15	T
3	19655460	ENSSSCG00000007815	T	.	.	.	.	.	.	.	.	.	.	.	.	C	27	5	C	C	45	8	C
3	19663291	ENSSSCG00000007815	G	.	.	.	.	.	.	.	.	.	.	.	.	A	51	9	A	A	63	11	A
3	19663348	ENSSSCG00000007815	G	.	.	.	.	.	.	.	.	.	.	.	.	C	63	12	C	C	75	14	C
3	19665146	ENSSSCG00000007815	C	.	.	.	.	.	.	.	.	.	.	.	.	T	99	22	T	T	51	9	T
3	19665230	ENSSSCG00000007815	T	.	.	.	.	.	.	.	.	.	.	.	.	C	99	29	C	C	93	17	C
3	19666694	ENSSSCG00000007815	A	.	.	.	.	.	.	.	.	.	.	.	.	G	45	8	G	G	57	10	G
3	19668098	ENSSSCG00000007815	G	.	.	.	.	.	.	.	.	.	.	.	.	C	81	15	C	C	93	16	C
3	19668124	ENSSSCG00000007815	T	.	.	.	.	.	.	.	.	.	.	.	.	C	51	10	C	C	93	17	C
3	19668351	ENSSSCG00000007815	C	.	.	.	.	.	.	.	.	.	.	.	.	T	47	10	Y	T	96	10	Y
3	19668386	ENSSSCG00000007815	G	.	.	.	.	.	.	.	.	.	.	.	.	T	69	14	T	T	99	18	T
3	19668482	ENSSSCG00000007815	T	.	.	.	.	.	.	.	.	.	.	.	.	C	99	25	C	C	99	19	C
3	19668571	ENSSSCG00000007815	C	.	.	.	.	.	.	.	.	.	.	.	.	T	99	17	T	T	69	12	T
3	19670753	ENSSSCG00000007815	C	.	.	.	.	.	.	.	.	.	.	.	.	T	93	18	T	T	99	19	T
3	19671937	ENSSSCG00000007815	A	.	.	.	.	.	.	.	.	.	.	.	.	G	51	9	G	G	81	14	G
3	19672030	ENSSSCG00000007815	T	.	.	.	.	.	.	.	.	.	.	.	.	C	45	8	C	C	99	28	C
3	19672369	ENSSSCG00000007815	G	.	.	.	.	.	.	.	.	.	.	.	.	A	33	6	A	A	27	5	A
3	19672377	ENSSSCG00000007815	C	.	.	.	.	.	.	.	.	.	.	.	.	T	57	10	T	T	39	7	T
3	19672541	ENSSSCG00000007815	T	.	.	.	.	.	.	.	.	.	.	.	.	C	69	14	C	C	87	15	C
3	19672670	ENSSSCG00000007815	A	.	.	.	.	.	.	.	.	.	.	.	.	G	54	11	R	G	27	5	G
3	19672715	ENSSSCG00000007815	A	.	.	.	.	.	.	.	.	.	.	.	.	G	73	12	R	G	27	5	G
3	19681834	ENSSSCG00000007816	T	.	.	.	.	.	.	.	.	.	.	.	.	C	54	13	Y	C	33	6	C
3	19681858	ENSSSCG00000007816	T	.	.	.	.	.	.	.	.	.	.	.	.	C	99	29	C	C	57	11	C
3	19682395	ENSSSCG00000007816	G	.	.	.	.	.	.	.	.	.	.	.	.	A	99	47	A	A	99	19	A
3	19682427	ENSSSCG00000007816	T	.	.	.	.	.	.	.	.	.	.	.	.	C	99	40	C	C	81	14	C
3	19682534	ENSSSCG00000007816	C	.	.	.	.	.	.	.	.	.	.	.	.	T	99	47	T	T	45	24	T
3	19686902	ENSSSCG00000007816	C	.	.	.	.	.	.	.	.	.	.	.	.	T	99	20	Y	T	92	8	Y
3	19688318	ENSSSCG00000007816	C	.	.	.	.	.	.	.	.	.	.	.	.	T	57	8	Y	T	33	6	T
3	19692043	ENSSSCG00000007816	C	.	.	.	.	.	.	.	.	.	.	.	.	T	74	13	Y	T	99	16	Y
3	19721981	ENSSSCG00000007816	T	.	.	.	.	.	.	.	.	.	.	.	.	C	93	17	C	C	69	12	C
3	19846587	ENSSSCG00000007817	T	.	.	.	.	.	.	.	.	.	.	.	.	C	99	78	C	C	99	89	C
3	19846636	ENSSSCG00000007817	G	.	.	.	.	.	.	.	.	.	.	.	.	A	99	82	A	A	99	67	A
3	19846880	ENSSSCG00000007817	T	.	.	.	.	.	.	.	.	.	.	.	.	A	99	70	A	A	99	71	A
3	19846946	ENSSSCG00000007817	G	.	.	.	.	.	.	.	.	.	.	.	.	A	99	69	A	A	99	44	A
3	19847004	ENSSSCG00000007817	C	.	.	.	.	.	.	.	.	.	.	.	.	T	99	67	T	T	99	59	T
3	19847249	ENSSSCG00000007817	A	.	.	.	.	.	.	.	.	.	.	.	.	G	99	82	G	G	99	81	G
3	19847317	ENSSSCG00000007817	C	.	.	.	.	.	.	.	.	.	.	.	.	T	99	54	T	T	99	50	T
3	19847589	ENSSSCG00000007817	G	.	.	.	.	.	.	.	.	.	.	.	.	A	99	21	R	A	99	17	A
3	19847610	ENSSSCG00000007817	C	.	.	.	.	.	.	.	.	.	.	.	.	T	57	31	T	T	99	22	T
3	19847637	ENSSSCG00000007817	G	.	.	.	.	.	.	.	.	.	.	.	.	A	99	32	R	A	99	23	A
3	19848107	ENSSSCG00000007817	C	.	.	.	.	.	.	.	.	.	.	.	.	T	99	49	T	T	99	52	T
3	19848815	ENSSSCG00000007817	C	.	.	.	.	.	.	.	.	.	.	.	.	A	99	43	A	A	99	51	A
3	19869255	ENSSSCG00000007817	C	.	.	.	.	.	.	.	.	.	.	.	.	T	99	18	T	T	99	27	T
3	19882070	ENSSSCG00000007818	G	.	.	.	.	.	.	.	.	.	.	.	.	A	99	13	R	A	51	10	A
3	19882151	ENSSSCG00000007818	C	.	.	.	.	.	.	.	.	.	.	.	.	T	99	11	Y	T	66	11	Y
3	24462689	ENSSSCG00000007843	C	.	.	.	.	.	.	.	.	.	.	.	.	T	34	30	Y	T	93	72	Y
3	24472725	ENSSSCG00000007843	T	.	.	.	.	.	.	.	.	.	.	.	.	G	45	8	G	G	33	6	G
3	24710958	ENSSSCG00000007845	G	.	.	.	.	.	.	.	.	.	.	.	.	A	51	19	A	A	99	32	A
3	29060914	ENSSSCG00000007873	A	.	.	.	.	.	.	.	.	.	.	.	.	G	85	10	R	G	72	9	R
3	29647378	ENSSSCG00000007878	G	.	.	.	.	.	.	.	.	.	.	.	.	A	27	5	A	A	58	6	R
3	29650176	ENSSSCG00000007878	C	.	.	.	.	.	.	.	.	.	.	.	.	T	60	6	Y	T	72	5	Y
3	29876511	ENSSSCG00000007878	T	.	.	.	.	.	.	.	.	.	.	.	.	C	21	5	C	C	45	8	C
3	32130301	ENSSSCG00000007888	C	.	.	.	.	.	.	.	.	.	.	.	.	G	95	14	S	G	94	16	S
3	38394342	ENSSSCG00000007925	T	.	.	.	.	.	.	.	.	.	.	.	.	C	45	9	C	C	99	12	Y
3	38765118	ENSSSCG00000007930	G	.	.	.	.	.	.	.	.	.	.	.	.	A	51	19	A	A	99	28	R
3	38892927	ENSSSCG00000007941	G	.	.	.	.	.	.	.	.	.	.	.	.	A	99	44	A	A	99	36	R
3	38899284	ENSSSCG00000007942	A	.	.	.	.	.	.	.	.	.	.	.	.	G	99	46	G	G	99	79	R
3	39016120	ENSSSCG00000007944	C	.	.	.	.	.	.	.	.	.	.	.	.	A	27	5	A	A	37	7	M
3	39033259	ENSSSCG00000007944	A	.	.	.	.	.	.	.	.	.	.	.	.	T	63	11	T	T	53	6	W
3	39040202	ENSSSCG00000007944	G	A	99	63	R	A	93	30	A	A	99	39	R	.	.	.	.	.	.	.	.
3	39541729	ENSSSCG00000007951	C	.	.	.	.	.	.	.	.	.	.	.	.	T	39	7	T	T	53	8	Y
3	39797676	ENSSSCG00000007951	A	.	.	.	.	.	.	.	.	.	.	.	.	G	99	25	G	G	99	50	G
3	40173910	ENSSSCG00000007958	G	.	.	.	.	.	.	.	.	.	.	.	.	A	51	9	A	A	99	14	R
3	40868953	ENSSSCG00000007962	G	.	.	.	.	.	.	.	.	.	.	.	.	A	99	26	A	A	58	27	R
3	40961908	ENSSSCG00000007979	G	.	.	.	.	.	.	.	.	.	.	.	.	A	99	36	A	A	34	24	R
3	40965200	ENSSSCG00000007979	C	.	.	.	.	.	.	.	.	.	.	.	.	T	99	20	T	T	73	8	Y
3	40991060	ENSSSCG00000007979	T	.	.	.	.	.	.	.	.	.	.	.	.	C	75	14	C	C	99	11	Y
3	41021334	ENSSSCG00000007980	G	.	.	.	.	.	.	.	.	.	.	.	.	A	99	31	A	A	99	12	R
3	40898734	ENSSSCG00000007981	T	.	.	.	.	.	.	.	.	.	.	.	.	C	99	73	C	C	99	41	Y
3	40899510	ENSSSCG00000007981	G	.	.	.	.	.	.	.	.	.	.	.	.	A	99	27	A	A	99	19	R
3	40914195	ENSSSCG00000007981	G	.	.	.	.	.	.	.	.	.	.	.	.	A	99	36	A	A	99	21	R
3	41103143	ENSSSCG00000007985	C	.	.	.	.	.	.	.	.	.	.	.	.	G	99	31	G	G	99	30	S
3	41107679	ENSSSCG00000007985	C	.	.	.	.	.	.	.	.	.	.	.	.	G	27	5	G	G	91	17	S
3	41120236	ENSSSCG00000007986	G	.	.	.	.	.	.	.	.	.	.	.	.	A	99	42	A	A	99	49	R
3	41265881	ENSSSCG00000007992	A	.	.	.	.	.	.	.	.	.	.	.	.	G	51	9	G	G	99	13	R
3	41291454	ENSSSCG00000007993	G	.	.	.	.	.	.	.	.	.	.	.	.	C	99	37	C	C	99	38	S
3	41295841	ENSSSCG00000007993	A	.	.	.	.	.	.	.	.	.	.	.	.	G	99	35	G	G	99	19	R
3	41348614	ENSSSCG00000007995	G	.	.	.	.	.	.	.	.	.	.	.	.	A	45	8	A	A	58	6	R
3	41373123	ENSSSCG00000007997	C	.	.	.	.	.	.	.	.	.	.	.	.	T	99	19	T	T	52	6	Y
3	41373454	ENSSSCG00000007997	T	.	.	.	.	.	.	.	.	.	.	.	.	C	99	63	C	C	99	50	Y
3	41375852	ENSSSCG00000007997	G	.	.	.	.	.	.	.	.	.	.	.	.	C	99	89	C	C	99	54	S
3	41381672	ENSSSCG00000007999	G	.	.	.	.	.	.	.	.	.	.	.	.	A	93	17	A	A	99	27	R
3	41466616	ENSSSCG00000008000	C	.	.	.	.	.	.	.	.	.	.	.	.	T	99	99	T	T	99	48	Y
3	41466707	ENSSSCG00000008000	G	.	.	.	.	.	.	.	.	.	.	.	.	C	99	35	C	C	52	24	S
3	41466900	ENSSSCG00000008000	C	.	.	.	.	.	.	.	.	.	.	.	.	T	99	71	T	T	99	40	Y
3	41432007	ENSSSCG00000008002	T	.	.	.	.	.	.	.	.	.	.	.	.	C	99	40	C	C	99	25	Y
3	41432028	ENSSSCG00000008002	G	.	.	.	.	.	.	.	.	.	.	.	.	A	99	19	A	A	30	5	R
3	41387358	ENSSSCG00000008007	G	.	.	.	.	.	.	.	.	.	.	.	.	A	99	67	A	A	99	47	R
3	41387893	ENSSSCG00000008007	C	.	.	.	.	.	.	.	.	.	.	.	.	A	99	71	A	A	80	27	M
3	41389586	ENSSSCG00000008007	A	.	.	.	.	.	.	.	.	.	.	.	.	G	99	27	G	G	77	13	R
3	41390002	ENSSSCG00000008007	T	.	.	.	.	.	.	.	.	.	.	.	.	C	99	20	C	C	40	9	Y
3	41548597	ENSSSCG00000008009	C	.	.	.	.	.	.	.	.	.	.	.	.	T	99	27	T	T	64	13	Y
3	41550550	ENSSSCG00000008009	C	.	.	.	.	.	.	.	.	.	.	.	.	T	99	18	T	T	99	39	Y
3	41560126	ENSSSCG00000008009	C	.	.	.	.	.	.	.	.	.	.	.	.	T	99	31	T	T	99	42	Y
3	41472794	ENSSSCG00000008010	T	.	.	.	.	.	.	.	.	.	.	.	.	C	45	8	C	C	99	9	Y
3	41631339	ENSSSCG00000008014	C	.	.	.	.	.	.	.	.	.	.	.	.	T	99	50	T	T	99	79	Y
3	41632016	ENSSSCG00000008014	C	.	.	.	.	.	.	.	.	.	.	.	.	T	99	26	T	T	84	9	Y
3	41632753	ENSSSCG00000008014	A	.	.	.	.	.	.	.	.	.	.	.	.	G	63	12	G	G	68	10	R
3	41632844	ENSSSCG00000008014	G	.	.	.	.	.	.	.	.	.	.	.	.	A	51	9	A	A	48	12	R
3	41622730	ENSSSCG00000008015	A	.	.	.	.	.	.	.	.	.	.	.	.	G	99	17	G	G	99	11	R
3	41659174	ENSSSCG00000008016	T	.	.	.	.	.	.	.	.	.	.	.	.	G	99	62	G	G	99	72	K
3	41681564	ENSSSCG00000008018	G	.	.	.	.	.	.	.	.	.	.	.	.	A	99	19	A	A	99	18	R
3	41705243	ENSSSCG00000008018	G	.	.	.	.	.	.	.	.	.	.	.	.	C	99	22	C	C	54	24	S
3	41709685	ENSSSCG00000008019	G	.	.	.	.	.	.	.	.	.	.	.	.	A	99	29	A	A	99	23	R
3	41710173	ENSSSCG00000008019	C	.	.	.	.	.	.	.	.	.	.	.	.	T	99	28	T	T	74	26	Y
3	41710242	ENSSSCG00000008019	T	.	.	.	.	.	.	.	.	.	.	.	.	G	99	29	G	G	62	34	K
3	41716174	ENSSSCG00000008019	T	.	.	.	.	.	.	.	.	.	.	.	.	C	99	25	C	C	99	39	Y
3	41835884	ENSSSCG00000008022	T	.	.	.	.	.	.	.	.	.	.	.	.	C	27	5	C	C	33	6	C
3	41840355	ENSSSCG00000008022	G	.	.	.	.	.	.	.	.	.	.	.	.	A	99	29	A	A	99	31	R
3	41841458	ENSSSCG00000008022	G	.	.	.	.	.	.	.	.	.	.	.	.	A	99	61	A	A	99	45	R
3	41842354	ENSSSCG00000008022	G	.	.	.	.	.	.	.	.	.	.	.	.	A	99	44	A	A	99	48	R
3	41987823	ENSSSCG00000008030	C	.	.	.	.	.	.	.	.	.	.	.	.	T	99	80	T	T	99	84	Y
3	41989205	ENSSSCG00000008030	T	.	.	.	.	.	.	.	.	.	.	.	.	A	99	62	A	A	99	59	W
3	42009569	ENSSSCG00000008031;ENSSSCG00000022963	T	.	.	.	.	.	.	.	.	.	.	.	.	C	99	31	C	C	99	36	Y
3	41926180	ENSSSCG00000008032	G	.	.	.	.	.	.	.	.	.	.	.	.	A	86	57	R	A	51	13	R
3	41926370	ENSSSCG00000008032	T	.	.	.	.	.	.	.	.	.	.	.	.	C	99	42	C	C	99	15	Y
3	41926973	ENSSSCG00000008032	G	.	.	.	.	.	.	.	.	.	.	.	.	A	99	40	A	A	99	25	R
3	41927023	ENSSSCG00000008032	G	.	.	.	.	.	.	.	.	.	.	.	.	A	99	26	A	A	99	16	R
3	42237279	ENSSSCG00000008038	C	.	.	.	.	.	.	.	.	.	.	.	.	T	99	53	T	T	99	28	Y
3	42240853	ENSSSCG00000008039	A	.	.	.	.	.	.	.	.	.	.	.	.	C	69	12	C	C	27	9	M
3	42241539	ENSSSCG00000008039	T	.	.	.	.	.	.	.	.	.	.	.	.	C	75	13	C	C	24	7	Y
3	42275320	ENSSSCG00000008040	C	.	.	.	.	.	.	.	.	.	.	.	.	T	99	26	T	T	99	22	Y
3	42353222	ENSSSCG00000008043	A	.	.	.	.	.	.	.	.	.	.	.	.	G	99	19	G	G	99	20	R
3	42364340	ENSSSCG00000008043	A	.	.	.	.	.	.	.	.	.	.	.	.	G	99	61	G	G	99	81	R
3	42398401	ENSSSCG00000008044	C	.	.	.	.	.	.	.	.	.	.	.	.	T	99	20	T	T	58	16	Y
3	42415695	ENSSSCG00000008047	C	.	.	.	.	.	.	.	.	.	.	.	.	T	99	20	T	T	99	30	Y
3	42416672	ENSSSCG00000008047	G	.	.	.	.	.	.	.	.	.	.	.	.	A	99	22	A	A	80	8	R
3	42434299	ENSSSCG00000008051	G	.	.	.	.	.	.	.	.	.	.	.	.	A	99	25	A	A	77	19	R
3	42700784	ENSSSCG00000008056	C	.	.	.	.	.	.	.	.	.	.	.	.	G	99	34	G	G	63	33	S
3	42707017	ENSSSCG00000008057	G	.	.	.	.	.	.	.	.	.	.	.	.	C	39	7	C	C	88	10	S
3	42716108	ENSSSCG00000008057	C	.	.	.	.	.	.	.	.	.	.	.	.	T	99	33	T	T	99	30	Y
3	40632761	ENSSSCG00000008061	A	.	.	.	.	.	.	.	.	.	.	.	.	G	26	17	R	G	72	5	R
3	40633506	ENSSSCG00000008061	A	.	.	.	.	.	.	.	.	.	.	.	.	G	45	8	G	G	21	17	R
3	43981383	ENSSSCG00000008077	T	.	.	.	.	.	.	.	.	.	.	.	.	G	27	5	G	G	30	5	K
3	45319401	ENSSSCG00000008088	G	.	.	.	.	.	.	.	.	.	.	.	.	T	99	31	T	T	99	10	K
3	45320930	ENSSSCG00000008088	A	.	.	.	.	.	.	.	.	.	.	.	.	G	21	5	G	G	85	7	R
3	45544782	ENSSSCG00000008098	T	.	.	.	.	.	.	.	.	.	.	.	.	C	51	9	C	C	93	10	Y
3	48848418	ENSSSCG00000008123	A	.	.	.	.	.	.	.	.	.	.	.	.	G	99	19	G	G	99	10	R
3	48848453	ENSSSCG00000008123	C	.	.	.	.	.	.	.	.	.	.	.	.	T	99	31	T	T	57	21	Y
3	49034846	ENSSSCG00000008125;ENSSSCG00000008127	C	.	.	.	.	.	.	.	.	.	.	.	.	T	33	6	T	T	99	11	Y
3	49695693	ENSSSCG00000008136	G	.	.	.	.	.	.	.	.	.	.	.	.	C	75	14	C	C	99	18	S
3	49800981	ENSSSCG00000008137	T	.	.	.	.	.	.	.	.	.	.	.	.	C	27	5	C	C	66	6	Y
3	53937816	ENSSSCG00000008151	G	.	.	.	.	.	.	.	.	.	.	.	.	C	39	7	C	C	27	5	C
3	53950612	ENSSSCG00000008151	G	.	.	.	.	.	.	.	.	.	.	.	.	A	87	15	A	A	53	13	R
3	54243581	ENSSSCG00000008157	G	.	.	.	.	.	.	.	.	.	.	.	.	A	99	14	R	A	57	8	R
3	54254433	ENSSSCG00000008157	T	.	.	.	.	.	.	.	.	.	.	.	.	C	99	10	Y	C	87	15	C
3	55588433	ENSSSCG00000008168	G	.	.	.	.	.	.	.	.	.	.	.	.	A	99	12	R	A	99	45	R
3	56484432	ENSSSCG00000008175	A	.	.	.	.	.	.	.	.	.	.	.	.	G	66	7	R	G	85	6	R
3	56484489	ENSSSCG00000008175	G	.	.	.	.	.	.	.	.	.	.	.	.	A	33	11	R	A	55	12	R
3	57154026	ENSSSCG00000008177	G	.	.	.	.	.	.	.	.	.	.	.	.	A	37	14	R	A	99	11	R
3	57315053	ENSSSCG00000008178	A	.	.	.	.	.	.	.	.	.	.	.	.	G	39	7	G	G	57	11	R
3	57529771	ENSSSCG00000008180	C	.	.	.	.	.	.	.	.	.	.	.	.	T	99	36	Y	T	87	41	Y
3	58264780	ENSSSCG00000008190	A	.	.	.	.	.	.	.	.	.	.	.	.	G	90	6	R	G	72	5	R
3	59141597	ENSSSCG00000008193	C	.	.	.	.	.	.	.	.	.	.	.	.	T	45	8	T	T	63	11	T
3	59234163	ENSSSCG00000008193;ENSSSCG00000008198	C	.	.	.	.	.	.	.	.	.	.	.	.	T	99	33	Y	T	99	22	Y
3	59278176	ENSSSCG00000008196	C	.	.	.	.	.	.	.	.	.	.	.	.	T	51	9	T	T	45	8	T
3	59288564	ENSSSCG00000008196	C	.	.	.	.	.	.	.	.	.	.	.	.	A	51	9	A	A	69	14	A
3	59864561	ENSSSCG00000008207	C	.	.	.	.	.	.	.	.	.	.	.	.	T	66	6	Y	T	99	42	Y
3	60102049	ENSSSCG00000008208	C	.	.	.	.	.	.	.	.	.	.	.	.	T	33	6	T	T	99	23	T
3	60678891	ENSSSCG00000008213	C	.	.	.	.	.	.	.	.	.	.	.	.	T	99	27	Y	T	99	43	Y
3	60679168	ENSSSCG00000008213	A	.	.	.	.	.	.	.	.	.	.	.	.	G	99	61	G	G	99	50	G
3	60679275	ENSSSCG00000008213	G	.	.	.	.	.	.	.	.	.	.	.	.	A	99	46	R	A	88	51	R
3	60679361	ENSSSCG00000008213	A	.	.	.	.	.	.	.	.	.	.	.	.	G	99	40	R	G	89	59	R
3	60840449	ENSSSCG00000008216	G	.	.	.	.	.	.	.	.	.	.	.	.	C	83	8	S	C	99	10	S
3	60852965	ENSSSCG00000008217	G	A	87	31	A	A	49	9	R	A	99	10	R	.	.	.	.	.	.	.	.
3	60853967	ENSSSCG00000008217	T	.	.	.	.	.	.	.	.	.	.	.	.	C	81	14	C	C	99	71	C
3	61060618	ENSSSCG00000008221	T	.	.	.	.	.	.	.	.	.	.	.	.	C	45	9	C	C	99	21	C
3	61492843	ENSSSCG00000008225	T	.	.	.	.	.	.	.	.	.	.	.	.	C	99	21	C	C	99	21	C
3	61492880	ENSSSCG00000008225	C	.	.	.	.	.	.	.	.	.	.	.	.	A	66	18	M	A	63	27	M
3	61494569	ENSSSCG00000008225	T	.	.	.	.	.	.	.	.	.	.	.	.	C	84	14	Y	C	99	9	Y
3	61505999	ENSSSCG00000008225	C	.	.	.	.	.	.	.	.	.	.	.	.	T	71	5	Y	T	89	7	Y
3	61506020	ENSSSCG00000008225	C	.	.	.	.	.	.	.	.	.	.	.	.	T	72	5	Y	T	99	8	Y
3	61584364	ENSSSCG00000008226	C	.	.	.	.	.	.	.	.	.	.	.	.	A	99	10	M	A	99	7	M
3	61595471	ENSSSCG00000008226	C	.	.	.	.	.	.	.	.	.	.	.	.	T	72	5	Y	T	72	12	Y
3	61609643	ENSSSCG00000008226	G	.	.	.	.	.	.	.	.	.	.	.	.	A	99	19	R	A	99	18	R
3	61954787	ENSSSCG00000008228	C	.	.	.	.	.	.	.	.	.	.	.	.	T	72	13	Y	T	99	12	Y
3	61956252	ENSSSCG00000008228	T	.	.	.	.	.	.	.	.	.	.	.	.	C	99	22	Y	C	99	25	C
3	61956348	ENSSSCG00000008228	C	.	.	.	.	.	.	.	.	.	.	.	.	T	27	5	T	T	27	5	T
3	61957565	ENSSSCG00000008228	A	.	.	.	.	.	.	.	.	.	.	.	.	G	45	8	G	G	33	6	G
3	62310392	ENSSSCG00000008237	A	.	.	.	.	.	.	.	.	.	.	.	.	G	27	5	G	G	57	10	G
3	62337033	ENSSSCG00000008238	A	.	.	.	.	.	.	.	.	.	.	.	.	G	99	27	G	G	99	24	R
3	62338105	ENSSSCG00000008238	C	.	.	.	.	.	.	.	.	.	.	.	.	T	99	23	Y	T	99	24	Y
3	62338628	ENSSSCG00000008238	A	.	.	.	.	.	.	.	.	.	.	.	.	G	81	14	G	G	99	19	R
3	62352641	ENSSSCG00000008238	T	.	.	.	.	.	.	.	.	.	.	.	.	C	99	29	Y	C	99	21	Y
3	62353875	ENSSSCG00000008238	C	.	.	.	.	.	.	.	.	.	.	.	.	T	99	33	Y	T	99	16	Y
3	62354410	ENSSSCG00000008238	G	.	.	.	.	.	.	.	.	.	.	.	.	T	99	54	K	T	55	24	K
3	62354439	ENSSSCG00000008238	C	.	.	.	.	.	.	.	.	.	.	.	.	T	99	34	Y	T	67	15	Y
3	63171587	ENSSSCG00000008247	A	.	.	.	.	.	.	.	.	.	.	.	.	G	99	21	G	G	99	35	G
3	72757138	ENSSSCG00000008305	G	.	.	.	.	.	.	.	.	.	.	.	.	A	57	10	A	A	39	7	A
3	74952032	ENSSSCG00000008316	T	.	.	.	.	.	.	.	.	.	.	.	.	C	75	14	C	C	99	28	C
3	74953850	ENSSSCG00000008316	T	.	.	.	.	.	.	.	.	.	.	.	.	G	69	12	G	G	45	9	G
3	75918595	ENSSSCG00000008334	C	.	.	.	.	.	.	.	.	.	.	.	.	T	93	16	T	T	39	7	T
3	75918627	ENSSSCG00000008334	G	.	.	.	.	.	.	.	.	.	.	.	.	A	93	16	A	A	33	6	A
3	75918765	ENSSSCG00000008334	A	.	.	.	.	.	.	.	.	.	.	.	.	G	57	10	G	G	33	6	G
3	75919215	ENSSSCG00000008334	G	.	.	.	.	.	.	.	.	.	.	.	.	A	39	7	A	A	50	7	R
3	75925357	ENSSSCG00000008334	C	.	.	.	.	.	.	.	.	.	.	.	.	T	99	24	T	T	27	5	T
3	75926030	ENSSSCG00000008334	T	.	.	.	.	.	.	.	.	.	.	.	.	C	33	6	C	C	39	8	C
3	75935121	ENSSSCG00000008334	T	.	.	.	.	.	.	.	.	.	.	.	.	C	99	46	C	C	99	20	C
3	75935140	ENSSSCG00000008334	T	.	.	.	.	.	.	.	.	.	.	.	.	C	99	36	C	C	93	17	C
3	77045434	ENSSSCG00000008344	A	.	.	.	.	.	.	.	.	.	.	.	.	C	75	13	C	C	99	28	M
3	77085814	ENSSSCG00000008344	T	.	.	.	.	.	.	.	.	.	.	.	.	C	39	22	C	C	99	45	Y
3	77085874	ENSSSCG00000008344	T	.	.	.	.	.	.	.	.	.	.	.	.	C	27	19	C	C	99	48	Y
3	77090489	ENSSSCG00000008344	A	.	.	.	.	.	.	.	.	.	.	.	.	G	33	6	G	G	99	50	R
3	77090522	ENSSSCG00000008344	G	.	.	.	.	.	.	.	.	.	.	.	.	A	33	6	A	A	75	52	R
3	77090656	ENSSSCG00000008344	T	.	.	.	.	.	.	.	.	.	.	.	.	C	58	7	Y	C	41	56	Y
3	77095925	ENSSSCG00000008344	A	.	.	.	.	.	.	.	.	.	.	.	.	G	99	62	G	G	99	75	G
3	77408832	ENSSSCG00000008348	G	A	67	25	A	A	99	17	R	A	39	21	A	.	.	.	.	.	.	.	.
3	80507152	ENSSSCG00000008358	T	.	.	.	.	.	.	.	.	.	.	.	.	C	45	8	C	C	99	26	C
3	80512124	ENSSSCG00000008358	C	.	.	.	.	.	.	.	.	.	.	.	.	T	57	12	T	T	27	5	T
3	81193054	ENSSSCG00000008363	A	.	.	.	.	.	.	.	.	.	.	.	.	G	51	9	G	G	99	28	G
3	81219148	ENSSSCG00000008363	T	.	.	.	.	.	.	.	.	.	.	.	.	G	45	8	G	G	93	16	G
3	81978451	ENSSSCG00000008368	C	.	.	.	.	.	.	.	.	.	.	.	.	A	63	11	A	A	99	21	A
3	81978507	ENSSSCG00000008368	A	.	.	.	.	.	.	.	.	.	.	.	.	G	33	6	G	G	99	26	G
3	81986256	ENSSSCG00000008368	T	.	.	.	.	.	.	.	.	.	.	.	.	C	57	11	C	C	99	27	C
3	84529615	ENSSSCG00000008383	T	.	.	.	.	.	.	.	.	.	.	.	.	C	57	10	C	C	21	6	C
3	90545022	ENSSSCG00000008398	T	.	.	.	.	.	.	.	.	.	.	.	.	C	33	7	C	C	33	6	C
3	90742878	ENSSSCG00000008404	G	.	.	.	.	.	.	.	.	.	.	.	.	A	27	5	A	A	33	6	A
3	91013645	ENSSSCG00000008409;ENSSSCG00000026559	T	.	.	.	.	.	.	.	.	.	.	.	.	C	51	10	C	C	63	11	C
3	91022801	ENSSSCG00000008409;ENSSSCG00000026559	C	.	.	.	.	.	.	.	.	.	.	.	.	T	81	15	T	T	39	7	T
3	91022888	ENSSSCG00000008409;ENSSSCG00000026559	A	.	.	.	.	.	.	.	.	.	.	.	.	G	57	11	G	G	63	11	G
3	92565455	ENSSSCG00000008415;ENSSSCG00000008416	A	G	93	16	G	G	27	5	G	G	51	10	G	.	.	.	.	.	.	.	.
3	97970810	ENSSSCG00000008423	T	.	.	.	.	.	.	.	.	.	.	.	.	C	33	6	C	C	51	9	C
3	103259393	ENSSSCG00000008461	T	.	.	.	.	.	.	.	.	.	.	.	.	C	39	7	C	C	75	13	C
3	103259953	ENSSSCG00000008461	A	.	.	.	.	.	.	.	.	.	.	.	.	G	39	7	G	G	63	11	G
3	103260589	ENSSSCG00000008461	A	.	.	.	.	.	.	.	.	.	.	.	.	C	33	7	C	C	99	26	C
3	103260847	ENSSSCG00000008461	G	.	.	.	.	.	.	.	.	.	.	.	.	A	87	15	A	A	27	5	A
3	103261294	ENSSSCG00000008461	G	.	.	.	.	.	.	.	.	.	.	.	.	A	93	17	A	A	99	31	A
3	107413133	ENSSSCG00000008478	C	.	.	.	.	.	.	.	.	.	.	.	.	G	51	11	G	G	27	5	G
3	107548996	ENSSSCG00000008481	G	.	.	.	.	.	.	.	.	.	.	.	.	A	51	10	A	A	69	12	A
3	107549785	ENSSSCG00000008481	A	.	.	.	.	.	.	.	.	.	.	.	.	C	27	5	C	C	27	6	C
3	107713339	ENSSSCG00000008482	C	.	.	.	.	.	.	.	.	.	.	.	.	T	51	10	T	T	51	12	T
3	109334945	ENSSSCG00000008491	A	.	.	.	.	.	.	.	.	.	.	.	.	G	45	8	G	G	99	19	G
3	109345774	ENSSSCG00000008491	G	.	.	.	.	.	.	.	.	.	.	.	.	A	57	11	A	A	46	6	R
3	109809367	ENSSSCG00000008498	A	.	.	.	.	.	.	.	.	.	.	.	.	G	27	5	G	G	57	10	G
3	110256290	ENSSSCG00000008503;ENSSSCG00000008504	C	.	.	.	.	.	.	.	.	.	.	.	.	T	33	6	T	T	67	7	Y
3	112970600	ENSSSCG00000008509	T	.	.	.	.	.	.	.	.	.	.	.	.	C	21	5	C	C	27	5	C
3	112971745	ENSSSCG00000008509	A	.	.	.	.	.	.	.	.	.	.	.	.	G	21	5	G	G	33	7	G
3	112971871	ENSSSCG00000008509	A	.	.	.	.	.	.	.	.	.	.	.	.	G	33	6	G	G	39	7	G
3	116922400	ENSSSCG00000008533	T	.	.	.	.	.	.	.	.	.	.	.	.	G	33	6	G	G	27	5	G
3	117360845	ENSSSCG00000008541	A	.	.	.	.	.	.	.	.	.	.	.	.	G	39	7	G	G	52	9	R
3	117362914	ENSSSCG00000008541	G	.	.	.	.	.	.	.	.	.	.	.	.	T	57	10	T	T	33	6	T
3	117370318	ENSSSCG00000008541	T	.	.	.	.	.	.	.	.	.	.	.	.	C	57	10	C	C	45	8	C
3	118300203	ENSSSCG00000008543	T	.	.	.	.	.	.	.	.	.	.	.	.	C	39	7	C	C	27	5	C
3	118530555	ENSSSCG00000008546	G	.	.	.	.	.	.	.	.	.	.	.	.	C	33	6	C	C	79	10	S
3	118507694	ENSSSCG00000008548	T	.	.	.	.	.	.	.	.	.	.	.	.	C	27	5	C	C	48	10	Y
3	118924059	ENSSSCG00000008550	T	.	.	.	.	.	.	.	.	.	.	.	.	C	99	19	C	C	57	11	C
3	118924763	ENSSSCG00000008550	T	.	.	.	.	.	.	.	.	.	.	.	.	C	69	12	C	C	81	14	C
3	118928301	ENSSSCG00000008550	A	.	.	.	.	.	.	.	.	.	.	.	.	G	87	16	G	G	75	13	G
3	118928441	ENSSSCG00000008550	G	.	.	.	.	.	.	.	.	.	.	.	.	A	99	18	A	A	63	12	A
3	118928986	ENSSSCG00000008550	G	.	.	.	.	.	.	.	.	.	.	.	.	A	99	29	A	A	87	15	A
3	118991069	ENSSSCG00000008553	G	.	.	.	.	.	.	.	.	.	.	.	.	A	99	19	A	A	99	34	A
3	118994314	ENSSSCG00000008553;ENSSSCG00000008554	C	.	.	.	.	.	.	.	.	.	.	.	.	T	99	40	T	T	99	45	T
3	118994415	ENSSSCG00000008553;ENSSSCG00000008554	G	.	.	.	.	.	.	.	.	.	.	.	.	A	45	8	A	A	87	15	A
3	118994423	ENSSSCG00000008553;ENSSSCG00000008554	T	.	.	.	.	.	.	.	.	.	.	.	.	G	39	7	G	G	93	17	G
3	118994485	ENSSSCG00000008553;ENSSSCG00000008554	A	.	.	.	.	.	.	.	.	.	.	.	.	G	63	11	G	G	63	11	G
3	119019767	ENSSSCG00000008556	C	.	.	.	.	.	.	.	.	.	.	.	.	T	99	34	T	T	99	27	T
3	119025425	ENSSSCG00000008556	T	.	.	.	.	.	.	.	.	.	.	.	.	C	87	15	C	C	93	16	C
3	119034754	ENSSSCG00000008557	A	.	.	.	.	.	.	.	.	.	.	.	.	G	27	5	G	G	81	15	G
3	119057359	ENSSSCG00000008558	G	.	.	.	.	.	.	.	.	.	.	.	.	A	90	12	R	A	99	13	R
3	119058844	ENSSSCG00000008558	T	.	.	.	.	.	.	.	.	.	.	.	.	C	93	16	C	C	49	6	Y
3	119059280	ENSSSCG00000008558	G	.	.	.	.	.	.	.	.	.	.	.	.	T	86	10	K	T	99	10	K
3	119061276	ENSSSCG00000008558	G	.	.	.	.	.	.	.	.	.	.	.	.	T	60	9	K	T	27	5	T
3	119069034	ENSSSCG00000008559	A	.	.	.	.	.	.	.	.	.	.	.	.	G	84	8	R	G	83	9	R
3	119069137	ENSSSCG00000008559	T	.	.	.	.	.	.	.	.	.	.	.	.	C	52	7	Y	C	61	5	Y
3	119070894	ENSSSCG00000008559	G	.	.	.	.	.	.	.	.	.	.	.	.	A	22	6	R	A	39	7	A
3	119071032	ENSSSCG00000008559	A	.	.	.	.	.	.	.	.	.	.	.	.	G	99	25	G	G	99	28	G
3	119071286	ENSSSCG00000008559	G	.	.	.	.	.	.	.	.	.	.	.	.	A	99	52	R	A	93	30	R
3	119071336	ENSSSCG00000008559	C	.	.	.	.	.	.	.	.	.	.	.	.	T	99	49	Y	T	99	34	Y
3	119072531	ENSSSCG00000008559	G	.	.	.	.	.	.	.	.	.	.	.	.	A	99	36	R	A	99	21	R
3	119072537	ENSSSCG00000008559	G	.	.	.	.	.	.	.	.	.	.	.	.	C	60	36	S	C	99	22	S
3	119077052	ENSSSCG00000008559	A	.	.	.	.	.	.	.	.	.	.	.	.	G	99	21	R	G	99	35	R
3	119280580	ENSSSCG00000008562	G	.	.	.	.	.	.	.	.	.	.	.	.	A	51	10	A	A	25	5	R
3	119281347	ENSSSCG00000008562	A	.	.	.	.	.	.	.	.	.	.	.	.	G	75	13	G	G	27	5	G
3	119286210	ENSSSCG00000008562	G	.	.	.	.	.	.	.	.	.	.	.	.	C	56	10	S	C	68	7	S
3	119720120	ENSSSCG00000008568;ENSSSCG00000008571	T	.	.	.	.	.	.	.	.	.	.	.	.	C	99	50	Y	C	99	18	C
3	119721716	ENSSSCG00000008568;ENSSSCG00000008571	G	.	.	.	.	.	.	.	.	.	.	.	.	A	99	28	R	A	54	8	R
3	119723478	ENSSSCG00000008568;ENSSSCG00000008571	A	.	.	.	.	.	.	.	.	.	.	.	.	G	56	35	R	G	99	19	G
3	119727915	ENSSSCG00000008568;ENSSSCG00000008571	G	.	.	.	.	.	.	.	.	.	.	.	.	A	99	18	R	A	99	19	A
3	119660256	ENSSSCG00000008569	T	.	.	.	.	.	.	.	.	.	.	.	.	C	99	24	Y	C	99	57	Y
3	119690727	ENSSSCG00000008569;ENSSSCG00000008571	C	.	.	.	.	.	.	.	.	.	.	.	.	T	87	7	Y	T	99	27	Y
3	119779508	ENSSSCG00000008571	G	A	99	34	A	A	45	8	A	A	99	25	R	.	.	.	.	.	.	.	.
3	119781558	ENSSSCG00000008571	G	A	99	27	A	A	69	12	A	A	99	22	R	.	.	.	.	.	.	.	.
3	119782780	ENSSSCG00000008571	T	C	99	33	C	C	99	33	C	C	99	44	C	.	.	.	.	.	.	.	.
3	119908989	ENSSSCG00000008573	G	.	.	.	.	.	.	.	.	.	.	.	.	A	93	17	A	A	99	24	A
3	121200070	ENSSSCG00000008578;ENSSSCG00000008579	G	.	.	.	.	.	.	.	.	.	.	.	.	C	21	8	S	C	21	5	C
3	121213080	ENSSSCG00000008580	C	.	.	.	.	.	.	.	.	.	.	.	.	T	99	17	Y	T	99	36	T
3	121741406	ENSSSCG00000008583	C	.	.	.	.	.	.	.	.	.	.	.	.	T	77	12	Y	T	63	19	Y
3	121766330	ENSSSCG00000008583	C	.	.	.	.	.	.	.	.	.	.	.	.	T	27	5	T	T	39	7	T
3	121766459	ENSSSCG00000008583	T	.	.	.	.	.	.	.	.	.	.	.	.	C	99	12	Y	C	51	9	C
3	121772683	ENSSSCG00000008583	T	.	.	.	.	.	.	.	.	.	.	.	.	C	72	18	Y	C	99	25	C
3	121870797	ENSSSCG00000008587	T	.	.	.	.	.	.	.	.	.	.	.	.	G	39	30	K	G	99	42	G
3	125746524	ENSSSCG00000008598	T	.	.	.	.	.	.	.	.	.	.	.	.	C	99	22	C	C	99	60	C
3	125746921	ENSSSCG00000008598	A	.	.	.	.	.	.	.	.	.	.	.	.	G	27	6	G	G	99	27	G
3	129231875	ENSSSCG00000008617	T	.	.	.	.	.	.	.	.	.	.	.	.	C	54	12	Y	C	21	5	C
3	129306979	ENSSSCG00000008617	C	.	.	.	.	.	.	.	.	.	.	.	.	T	45	8	T	T	99	19	T
3	129307633	ENSSSCG00000008617	T	.	.	.	.	.	.	.	.	.	.	.	.	C	87	15	C	C	99	24	C
3	129315546	ENSSSCG00000008617	A	.	.	.	.	.	.	.	.	.	.	.	.	G	27	5	G	G	93	16	G
3	130454110	ENSSSCG00000008619	A	.	.	.	.	.	.	.	.	.	.	.	.	G	66	5	R	G	45	12	R
3	133661585	ENSSSCG00000008624	A	.	.	.	.	.	.	.	.	.	.	.	.	G	45	8	G	G	45	8	G
3	134210856	ENSSSCG00000008631	T	.	.	.	.	.	.	.	.	.	.	.	.	G	99	10	K	G	99	25	K
3	134589495	ENSSSCG00000008633	G	.	.	.	.	.	.	.	.	.	.	.	.	A	99	88	R	A	99	92	A
3	135278674	ENSSSCG00000008638;ENSSSCG00000029313	A	.	.	.	.	.	.	.	.	.	.	.	.	G	27	5	G	G	33	6	G
3	135120761	ENSSSCG00000008641	A	.	.	.	.	.	.	.	.	.	.	.	.	G	33	6	G	G	51	10	G
3	135121230	ENSSSCG00000008641	T	.	.	.	.	.	.	.	.	.	.	.	.	C	63	11	C	C	99	13	Y
3	135121282	ENSSSCG00000008641	C	.	.	.	.	.	.	.	.	.	.	.	.	T	27	7	T	T	33	17	Y
3	135121737	ENSSSCG00000008641	T	.	.	.	.	.	.	.	.	.	.	.	.	C	33	6	C	C	99	16	Y
3	135121767	ENSSSCG00000008641	T	.	.	.	.	.	.	.	.	.	.	.	.	C	33	6	C	C	55	13	Y
3	135121861	ENSSSCG00000008641	G	.	.	.	.	.	.	.	.	.	.	.	.	A	99	21	A	A	57	12	A
3	135122003	ENSSSCG00000008641	C	.	.	.	.	.	.	.	.	.	.	.	.	G	41	6	S	G	99	27	G
3	137679420	ENSSSCG00000008648	T	.	.	.	.	.	.	.	.	.	.	.	.	C	33	6	C	C	99	80	C
3	137680601	ENSSSCG00000008648	T	.	.	.	.	.	.	.	.	.	.	.	.	C	63	13	C	C	75	13	C
3	137683293	ENSSSCG00000008648	A	.	.	.	.	.	.	.	.	.	.	.	.	G	27	5	G	G	99	46	G
3	137683300	ENSSSCG00000008648	G	.	.	.	.	.	.	.	.	.	.	.	.	A	27	5	A	A	66	47	R
3	75175371	ENSSSCG00000020736	G	A	53	8	R	A	27	5	A	A	99	8	R	.	.	.	.	.	.	.	.
3	59648549	ENSSSCG00000020750	T	.	.	.	.	.	.	.	.	.	.	.	.	A	77	40	W	A	47	24	W
3	135140392	ENSSSCG00000020799	A	.	.	.	.	.	.	.	.	.	.	.	.	G	99	42	G	G	99	31	G
3	135147297	ENSSSCG00000020799	G	.	.	.	.	.	.	.	.	.	.	.	.	A	75	13	A	A	99	21	A
3	135151613	ENSSSCG00000020799	G	.	.	.	.	.	.	.	.	.	.	.	.	A	99	19	A	A	99	27	R
3	135164101	ENSSSCG00000020799	A	.	.	.	.	.	.	.	.	.	.	.	.	G	99	14	R	G	79	11	R
3	135167250	ENSSSCG00000020799	G	.	.	.	.	.	.	.	.	.	.	.	.	C	33	7	C	C	99	17	S
3	17095994	ENSSSCG00000020808	T	C	45	15	Y	C	53	10	Y	C	21	19	C	.	.	.	.	.	.	.	.
3	17096108	ENSSSCG00000020808	C	.	.	.	.	.	.	.	.	.	.	.	.	T	45	9	T	T	99	25	Y
3	17100055	ENSSSCG00000020808	G	.	.	.	.	.	.	.	.	.	.	.	.	A	65	16	R	A	78	50	R
3	98711059	ENSSSCG00000020931	C	.	.	.	.	.	.	.	.	.	.	.	.	A	99	20	A	A	42	25	M
3	34790167	ENSSSCG00000021236	T	.	.	.	.	.	.	.	.	.	.	.	.	C	99	37	Y	C	65	35	Y
3	17841907	ENSSSCG00000021238	G	.	.	.	.	.	.	.	.	.	.	.	.	A	57	10	A	A	33	6	A
3	17842457	ENSSSCG00000021238	G	.	.	.	.	.	.	.	.	.	.	.	.	A	57	10	A	A	69	6	R
3	17843726	ENSSSCG00000021238	A	.	.	.	.	.	.	.	.	.	.	.	.	G	87	18	G	G	33	7	G
3	17844307	ENSSSCG00000021238	T	.	.	.	.	.	.	.	.	.	.	.	.	C	93	17	C	C	60	7	Y
3	4801110	ENSSSCG00000021285	C	.	.	.	.	.	.	.	.	.	.	.	.	T	87	17	T	T	99	14	Y
3	4948954	ENSSSCG00000021285	C	.	.	.	.	.	.	.	.	.	.	.	.	T	85	6	Y	T	92	7	Y
3	34623246	ENSSSCG00000021288	C	.	.	.	.	.	.	.	.	.	.	.	.	G	50	6	S	G	99	19	S
3	62246083	ENSSSCG00000021537	T	.	.	.	.	.	.	.	.	.	.	.	.	C	27	5	C	C	99	24	C
3	62246133	ENSSSCG00000021537	G	.	.	.	.	.	.	.	.	.	.	.	.	T	51	10	T	T	99	25	T
3	18700491	ENSSSCG00000021845	C	T	45	8	T	T	39	8	T	T	39	7	T	.	.	.	.	.	.	.	.
3	118914892	ENSSSCG00000022058	C	.	.	.	.	.	.	.	.	.	.	.	.	T	99	28	T	T	99	54	Y
3	18632878	ENSSSCG00000022075	T	.	.	.	.	.	.	.	.	.	.	.	.	C	64	20	Y	C	57	15	C
3	62132254	ENSSSCG00000022300	G	.	.	.	.	.	.	.	.	.	.	.	.	T	99	17	K	T	99	39	K
3	62137358	ENSSSCG00000022300	A	.	.	.	.	.	.	.	.	.	.	.	.	G	27	5	G	G	99	19	G
3	4586285	ENSSSCG00000022553	C	.	.	.	.	.	.	.	.	.	.	.	.	T	51	9	Y	T	99	19	Y
3	4589011	ENSSSCG00000022553	G	.	.	.	.	.	.	.	.	.	.	.	.	A	45	8	A	A	99	16	R
3	4594859	ENSSSCG00000022553	G	.	.	.	.	.	.	.	.	.	.	.	.	A	99	13	R	A	99	20	R
3	4594910	ENSSSCG00000022553	A	.	.	.	.	.	.	.	.	.	.	.	.	G	33	6	G	G	54	15	R
3	4597258	ENSSSCG00000022553	T	.	.	.	.	.	.	.	.	.	.	.	.	C	30	5	Y	C	79	8	Y
3	4600767	ENSSSCG00000022553	A	.	.	.	.	.	.	.	.	.	.	.	.	G	45	9	G	G	99	24	R
3	4608189	ENSSSCG00000022553	T	.	.	.	.	.	.	.	.	.	.	.	.	A	54	7	W	A	56	9	W
3	62249479	ENSSSCG00000022820	A	.	.	.	.	.	.	.	.	.	.	.	.	G	45	8	G	G	27	5	G
3	130153361	ENSSSCG00000022836	A	G	99	22	G	G	27	6	G	G	45	11	G	.	.	.	.	.	.	.	.
3	130153451	ENSSSCG00000022836	T	.	.	.	.	.	.	.	.	.	.	.	.	A	99	37	A	A	99	50	A
3	130155018	ENSSSCG00000022836	G	.	.	.	.	.	.	.	.	.	.	.	.	A	84	14	R	A	53	29	R
3	38944995	ENSSSCG00000022874	T	.	.	.	.	.	.	.	.	.	.	.	.	A	99	36	A	A	99	44	W
3	38950272	ENSSSCG00000022874	T	.	.	.	.	.	.	.	.	.	.	.	.	C	99	21	C	C	99	28	Y
3	38959050	ENSSSCG00000022874	T	.	.	.	.	.	.	.	.	.	.	.	.	C	69	12	C	C	97	14	Y
3	42066262	ENSSSCG00000022963	C	.	.	.	.	.	.	.	.	.	.	.	.	T	33	7	T	T	72	5	Y
3	18534471	ENSSSCG00000022996	C	.	.	.	.	.	.	.	.	.	.	.	.	T	99	36	T	T	99	34	T
3	18537788	ENSSSCG00000022996	A	.	.	.	.	.	.	.	.	.	.	.	.	G	99	33	G	G	87	15	G
3	41034333	ENSSSCG00000023204	A	.	.	.	.	.	.	.	.	.	.	.	.	G	99	58	G	G	99	45	R
3	41034613	ENSSSCG00000023204	C	.	.	.	.	.	.	.	.	.	.	.	.	T	99	36	T	T	90	42	Y
3	41037466	ENSSSCG00000023204	C	.	.	.	.	.	.	.	.	.	.	.	.	T	45	9	T	T	99	12	Y
3	41042056	ENSSSCG00000023204	G	.	.	.	.	.	.	.	.	.	.	.	.	A	99	36	A	A	99	39	R
3	6710890	ENSSSCG00000023257	C	.	.	.	.	.	.	.	.	.	.	.	.	T	45	8	T	T	36	9	Y
3	40624015	ENSSSCG00000023304	A	.	.	.	.	.	.	.	.	.	.	.	.	G	99	18	G	G	96	18	R
3	40626370	ENSSSCG00000023304	G	.	.	.	.	.	.	.	.	.	.	.	.	C	93	16	C	C	52	27	S
3	40626429	ENSSSCG00000023304	C	.	.	.	.	.	.	.	.	.	.	.	.	G	99	18	G	G	90	31	S
3	40626952	ENSSSCG00000023304	A	.	.	.	.	.	.	.	.	.	.	.	.	G	99	31	G	G	93	44	R
3	40630788	ENSSSCG00000023304	T	.	.	.	.	.	.	.	.	.	.	.	.	C	99	70	C	C	99	32	Y
3	42211152	ENSSSCG00000023400	C	.	.	.	.	.	.	.	.	.	.	.	.	T	75	14	T	T	83	14	Y
3	42213492	ENSSSCG00000023400	G	.	.	.	.	.	.	.	.	.	.	.	.	A	39	7	A	A	92	10	R
3	8138742	ENSSSCG00000023619	T	.	.	.	.	.	.	.	.	.	.	.	.	C	99	40	C	C	90	11	Y
3	39069649	ENSSSCG00000023653	T	.	.	.	.	.	.	.	.	.	.	.	.	C	27	5	C	C	21	10	Y
3	39070138	ENSSSCG00000023653	A	.	.	.	.	.	.	.	.	.	.	.	.	G	45	8	G	G	64	6	R
3	39073040	ENSSSCG00000023653	T	.	.	.	.	.	.	.	.	.	.	.	.	C	99	18	C	C	99	11	Y
3	61265114	ENSSSCG00000023710	G	.	.	.	.	.	.	.	.	.	.	.	.	C	54	23	S	C	34	17	S
3	61266584	ENSSSCG00000023710	A	T	63	11	T	T	33	7	T	T	21	5	T	.	.	.	.	.	.	.	.
3	18607919	ENSSSCG00000023772	G	.	.	.	.	.	.	.	.	.	.	.	.	T	99	42	K	T	99	49	T
3	18608184	ENSSSCG00000023772	T	.	.	.	.	.	.	.	.	.	.	.	.	G	83	56	K	G	99	81	K
3	18608281	ENSSSCG00000023772	C	.	.	.	.	.	.	.	.	.	.	.	.	G	99	42	G	G	99	98	G
3	18608400	ENSSSCG00000023772	C	.	.	.	.	.	.	.	.	.	.	.	.	T	99	41	Y	T	44	74	Y
3	18610665	ENSSSCG00000023772	A	.	.	.	.	.	.	.	.	.	.	.	.	G	21	5	G	G	39	8	G
3	18610715	ENSSSCG00000023772	C	.	.	.	.	.	.	.	.	.	.	.	.	T	62	22	Y	T	39	8	T
3	18610889	ENSSSCG00000023772	C	.	.	.	.	.	.	.	.	.	.	.	.	T	99	57	Y	T	99	58	Y
3	18610952	ENSSSCG00000023772	C	.	.	.	.	.	.	.	.	.	.	.	.	T	99	27	Y	T	99	41	Y
3	18611030	ENSSSCG00000023772	T	.	.	.	.	.	.	.	.	.	.	.	.	C	99	40	C	C	46	34	Y
3	18611083	ENSSSCG00000023772	T	.	.	.	.	.	.	.	.	.	.	.	.	C	99	62	C	C	99	49	Y
3	18611270	ENSSSCG00000023772	C	.	.	.	.	.	.	.	.	.	.	.	.	T	99	56	T	T	99	94	Y
3	18611446	ENSSSCG00000023772	G	.	.	.	.	.	.	.	.	.	.	.	.	A	99	19	R	A	99	80	R
3	5170291	ENSSSCG00000024245	C	.	.	.	.	.	.	.	.	.	.	.	.	T	63	28	T	T	99	31	T
3	5170316	ENSSSCG00000024245	A	.	.	.	.	.	.	.	.	.	.	.	.	G	99	58	G	G	99	50	G
3	5170653	ENSSSCG00000024245	T	.	.	.	.	.	.	.	.	.	.	.	.	C	55	32	Y	C	85	26	Y
3	5170675	ENSSSCG00000024245	A	.	.	.	.	.	.	.	.	.	.	.	.	G	53	19	R	G	99	19	G
3	5170813	ENSSSCG00000024245	C	.	.	.	.	.	.	.	.	.	.	.	.	G	99	22	S	G	99	27	S
3	5170937	ENSSSCG00000024245	A	.	.	.	.	.	.	.	.	.	.	.	.	G	99	66	G	G	99	41	G
3	5171155	ENSSSCG00000024245	A	.	.	.	.	.	.	.	.	.	.	.	.	C	56	23	M	C	51	19	C
3	5172174	ENSSSCG00000024245	G	.	.	.	.	.	.	.	.	.	.	.	.	A	99	38	A	A	99	29	R
3	5174079	ENSSSCG00000024245	A	.	.	.	.	.	.	.	.	.	.	.	.	G	99	33	G	G	99	18	G
3	5178944	ENSSSCG00000024245	C	.	.	.	.	.	.	.	.	.	.	.	.	G	87	15	G	G	99	23	G
3	9609498	ENSSSCG00000024397	G	.	.	.	.	.	.	.	.	.	.	.	.	A	93	17	A	A	56	7	R
3	33050734	ENSSSCG00000024488	G	A	99	24	R	A	99	15	R	A	99	15	R	.	.	.	.	.	.	.	.
3	61486303	ENSSSCG00000024564	C	.	.	.	.	.	.	.	.	.	.	.	.	T	99	25	Y	T	99	33	Y
3	61486330	ENSSSCG00000024564	C	.	.	.	.	.	.	.	.	.	.	.	.	T	99	20	Y	T	99	29	Y
3	61487964	ENSSSCG00000024564	C	.	.	.	.	.	.	.	.	.	.	.	.	T	99	61	Y	T	99	63	Y
3	42421358	ENSSSCG00000024587	C	.	.	.	.	.	.	.	.	.	.	.	.	T	99	18	T	T	61	11	Y
3	42422755	ENSSSCG00000024587	A	.	.	.	.	.	.	.	.	.	.	.	.	G	99	86	G	G	99	74	R
3	42423024	ENSSSCG00000024587	G	.	.	.	.	.	.	.	.	.	.	.	.	A	99	38	A	A	99	33	R
3	51798078	ENSSSCG00000024636	C	.	.	.	.	.	.	.	.	.	.	.	.	T	27	6	T	T	82	13	Y
3	51798153	ENSSSCG00000024636	G	.	.	.	.	.	.	.	.	.	.	.	.	C	63	11	C	C	49	15	S
3	140477407	ENSSSCG00000024665	T	.	.	.	.	.	.	.	.	.	.	.	.	C	99	13	Y	C	82	10	Y
3	140481944	ENSSSCG00000024665	C	.	.	.	.	.	.	.	.	.	.	.	.	T	51	9	T	T	87	15	T
3	140481977	ENSSSCG00000024665	A	.	.	.	.	.	.	.	.	.	.	.	.	G	45	8	G	G	75	14	G
3	140509746	ENSSSCG00000024665	A	.	.	.	.	.	.	.	.	.	.	.	.	C	45	8	C	C	75	16	C
3	140517920	ENSSSCG00000024665;ENSSSCG00000027353	G	.	.	.	.	.	.	.	.	.	.	.	.	C	27	5	C	C	27	5	C
3	26078303	ENSSSCG00000024748	A	.	.	.	.	.	.	.	.	.	.	.	.	G	57	10	G	G	39	7	G
3	8150560	ENSSSCG00000024789	C	.	.	.	.	.	.	.	.	.	.	.	.	A	99	36	A	A	99	24	M
3	8153649	ENSSSCG00000024789	A	.	.	.	.	.	.	.	.	.	.	.	.	G	93	16	G	G	94	14	R
3	1793511	ENSSSCG00000024952	G	.	.	.	.	.	.	.	.	.	.	.	.	C	61	6	S	C	66	8	S
3	32321022	ENSSSCG00000024982	G	.	.	.	.	.	.	.	.	.	.	.	.	A	99	16	R	A	99	56	R
3	32329522	ENSSSCG00000024982	G	.	.	.	.	.	.	.	.	.	.	.	.	A	99	48	R	A	99	55	R
3	32329603	ENSSSCG00000024982	C	.	.	.	.	.	.	.	.	.	.	.	.	T	99	69	Y	T	99	52	Y
3	58220618	ENSSSCG00000025010	T	.	.	.	.	.	.	.	.	.	.	.	.	G	54	10	K	G	99	23	K
3	58226897	ENSSSCG00000025010	G	.	.	.	.	.	.	.	.	.	.	.	.	A	59	8	R	A	99	12	R
3	58228006	ENSSSCG00000025010	C	.	.	.	.	.	.	.	.	.	.	.	.	T	57	10	T	T	57	11	T
3	7907625	ENSSSCG00000025096	C	.	.	.	.	.	.	.	.	.	.	.	.	T	33	6	T	T	42	16	Y
3	7657713	ENSSSCG00000025164	T	.	.	.	.	.	.	.	.	.	.	.	.	G	33	7	G	G	69	6	K
3	7661461	ENSSSCG00000025164;ENSSSCG00000026653	T	C	99	84	Y	C	99	35	Y	C	99	70	Y	.	.	.	.	.	.	.	.
3	7662272	ENSSSCG00000025164;ENSSSCG00000026653	A	.	.	.	.	.	.	.	.	.	.	.	.	G	99	18	G	G	99	32	G
3	17362758	ENSSSCG00000025245	A	.	.	.	.	.	.	.	.	.	.	.	.	G	33	6	G	G	21	5	G
3	17363194	ENSSSCG00000025245	C	.	.	.	.	.	.	.	.	.	.	.	.	G	27	7	G	G	33	6	G
3	17366380	ENSSSCG00000025245	T	.	.	.	.	.	.	.	.	.	.	.	.	C	51	9	C	C	63	11	C
3	17367046	ENSSSCG00000025245	A	.	.	.	.	.	.	.	.	.	.	.	.	G	45	8	G	G	45	10	G
3	7292231	ENSSSCG00000025271	A	.	.	.	.	.	.	.	.	.	.	.	.	G	63	12	G	G	45	10	G
3	18543969	ENSSSCG00000025321	T	.	.	.	.	.	.	.	.	.	.	.	.	C	99	38	C	C	99	21	C
3	118695929	ENSSSCG00000025363	A	G	99	20	G	G	39	8	G	G	99	24	R	.	.	.	.	.	.	.	.
3	118697084	ENSSSCG00000025363	C	T	99	55	T	T	99	23	T	T	99	37	T	.	.	.	.	.	.	.	.
3	118698156	ENSSSCG00000025363	C	A	99	58	A	A	99	33	A	A	99	55	M	.	.	.	.	.	.	.	.
3	118698310	ENSSSCG00000025363	T	A	99	54	A	A	81	28	A	A	99	51	W	.	.	.	.	.	.	.	.
3	9953482	ENSSSCG00000025486	A	.	.	.	.	.	.	.	.	.	.	.	.	T	99	92	T	T	58	89	W
3	9962128	ENSSSCG00000025486	T	.	.	.	.	.	.	.	.	.	.	.	.	C	99	39	C	C	99	61	Y
3	17386677	ENSSSCG00000025688	G	.	.	.	.	.	.	.	.	.	.	.	.	A	99	43	R	A	99	40	R
3	17386837	ENSSSCG00000025688	C	.	.	.	.	.	.	.	.	.	.	.	.	T	99	31	Y	T	34	6	Y
3	17386860	ENSSSCG00000025688	A	.	.	.	.	.	.	.	.	.	.	.	.	G	99	55	R	G	99	36	G
3	17386939	ENSSSCG00000025688	G	.	.	.	.	.	.	.	.	.	.	.	.	A	99	43	R	A	65	30	R
3	17387047	ENSSSCG00000025688	C	.	.	.	.	.	.	.	.	.	.	.	.	A	63	12	A	A	51	9	A
3	139859563	ENSSSCG00000025689	C	.	.	.	.	.	.	.	.	.	.	.	.	T	99	9	Y	T	47	10	Y
3	18187575	ENSSSCG00000025794	T	.	.	.	.	.	.	.	.	.	.	.	.	C	75	18	C	C	69	13	C
3	18187626	ENSSSCG00000025794	C	.	.	.	.	.	.	.	.	.	.	.	.	G	99	30	G	G	99	26	G
3	18187741	ENSSSCG00000025794	T	.	.	.	.	.	.	.	.	.	.	.	.	A	87	16	A	A	28	18	W
3	18188772	ENSSSCG00000025794	T	.	.	.	.	.	.	.	.	.	.	.	.	C	81	14	C	C	99	22	C
3	18188934	ENSSSCG00000025794	A	.	.	.	.	.	.	.	.	.	.	.	.	G	99	45	G	G	99	24	G
3	18189120	ENSSSCG00000025794	A	.	.	.	.	.	.	.	.	.	.	.	.	G	99	24	G	G	99	34	G
3	5262200	ENSSSCG00000025940	C	.	.	.	.	.	.	.	.	.	.	.	.	T	30	7	Y	T	79	37	Y
3	5262286	ENSSSCG00000025940	G	.	.	.	.	.	.	.	.	.	.	.	.	A	33	6	A	A	46	54	R
3	5262308	ENSSSCG00000025940	A	.	.	.	.	.	.	.	.	.	.	.	.	G	50	9	R	G	50	51	R
3	22219295	ENSSSCG00000026077	C	.	.	.	.	.	.	.	.	.	.	.	.	T	87	16	T	T	52	5	Y
3	42641536	ENSSSCG00000026326	T	.	.	.	.	.	.	.	.	.	.	.	.	C	33	6	C	C	45	8	C
3	42641589	ENSSSCG00000026326	C	.	.	.	.	.	.	.	.	.	.	.	.	T	33	6	T	T	41	6	Y
3	42641934	ENSSSCG00000026326	G	.	.	.	.	.	.	.	.	.	.	.	.	C	27	5	C	C	99	16	S
3	32885942	ENSSSCG00000026569	T	.	.	.	.	.	.	.	.	.	.	.	.	C	51	9	C	C	70	14	Y
3	34779492	ENSSSCG00000026710	T	.	.	.	.	.	.	.	.	.	.	.	.	G	45	8	G	G	50	23	K
3	34780541	ENSSSCG00000026710	G	A	99	45	R	A	99	20	R	A	99	18	R	.	.	.	.	.	.	.	.
3	6495841	ENSSSCG00000026896	A	.	.	.	.	.	.	.	.	.	.	.	.	G	99	35	G	G	99	18	R
3	6500431	ENSSSCG00000026896	T	.	.	.	.	.	.	.	.	.	.	.	.	G	45	8	G	G	42	14	K
3	42690903	ENSSSCG00000027098	C	.	.	.	.	.	.	.	.	.	.	.	.	A	39	7	A	A	99	17	M
3	118703935	ENSSSCG00000027135	G	C	95	43	C	C	99	27	S	C	99	32	S	.	.	.	.	.	.	.	.
3	40534208	ENSSSCG00000027252	C	.	.	.	.	.	.	.	.	.	.	.	.	T	99	37	T	T	34	24	Y
3	59986510	ENSSSCG00000027332	C	.	.	.	.	.	.	.	.	.	.	.	.	T	99	94	Y	T	72	84	Y
3	117490033	ENSSSCG00000027396	A	.	.	.	.	.	.	.	.	.	.	.	.	G	45	8	G	G	99	23	R
3	117490198	ENSSSCG00000027396	T	.	.	.	.	.	.	.	.	.	.	.	.	C	99	25	C	C	99	13	Y
3	117490312	ENSSSCG00000027396	C	.	.	.	.	.	.	.	.	.	.	.	.	A	99	26	A	A	65	20	M
3	11046729	ENSSSCG00000027487	T	.	.	.	.	.	.	.	.	.	.	.	.	C	27	6	C	C	97	9	Y
3	11054714	ENSSSCG00000027487	C	T	30	89	Y	T	41	45	Y	T	59	52	Y	.	.	.	.	.	.	.	.
3	18498528	ENSSSCG00000027629	C	.	.	.	.	.	.	.	.	.	.	.	.	A	44	11	M	A	33	10	M
3	18498793	ENSSSCG00000027629	C	.	.	.	.	.	.	.	.	.	.	.	.	T	99	41	Y	T	99	85	Y
3	18502080	ENSSSCG00000027629	T	.	.	.	.	.	.	.	.	.	.	.	.	C	99	27	Y	C	99	33	Y
3	18502146	ENSSSCG00000027629	T	C	75	13	C	C	45	8	C	C	51	10	C	.	.	.	.	.	.	.	.
3	18502225	ENSSSCG00000027629	G	.	.	.	.	.	.	.	.	.	.	.	.	A	99	39	A	A	33	74	R
3	61925167	ENSSSCG00000027683	G	.	.	.	.	.	.	.	.	.	.	.	.	A	99	46	R	A	99	84	R
3	18861421	ENSSSCG00000027933	T	G	99	74	K	G	99	17	K	G	99	38	K	.	.	.	.	.	.	.	.
3	18861485	ENSSSCG00000027933	C	T	99	48	Y	T	99	11	Y	T	99	30	Y	.	.	.	.	.	.	.	.
3	18862013	ENSSSCG00000027933	G	T	99	16	K	T	43	7	K	T	99	14	K	.	.	.	.	.	.	.	.
3	18862373	ENSSSCG00000027933	C	.	.	.	.	.	.	.	.	.	.	.	.	T	99	49	T	T	99	66	Y
3	18862468	ENSSSCG00000027933	G	A	96	23	R	A	99	15	R	A	60	16	R	.	.	.	.	.	.	.	.
3	18862993	ENSSSCG00000027933	C	.	.	.	.	.	.	.	.	.	.	.	.	T	69	12	T	T	70	30	Y
3	18863723	ENSSSCG00000027933	G	A	65	15	R	A	56	9	R	A	24	8	R	.	.	.	.	.	.	.	.
3	18863834	ENSSSCG00000027933	C	.	.	.	.	.	.	.	.	.	.	.	.	T	75	17	T	T	86	29	Y
3	18864589	ENSSSCG00000027933	G	.	.	.	.	.	.	.	.	.	.	.	.	A	81	16	A	A	99	37	R
3	18509333	ENSSSCG00000027946	A	.	.	.	.	.	.	.	.	.	.	.	.	G	99	33	R	G	99	26	R
3	18511150	ENSSSCG00000027946	G	.	.	.	.	.	.	.	.	.	.	.	.	A	99	18	R	A	39	16	R
3	18513415	ENSSSCG00000027946	A	G	68	61	R	G	67	44	R	G	99	25	G	.	.	.	.	.	.	.	.
3	18513585	ENSSSCG00000027946	T	.	.	.	.	.	.	.	.	.	.	.	.	C	54	11	Y	C	44	5	Y
3	18514804	ENSSSCG00000027946	C	G	99	82	S	G	99	34	S	G	99	49	G	.	.	.	.	.	.	.	.
3	18516952	ENSSSCG00000027946	T	G	99	56	K	G	79	12	K	G	99	39	G	.	.	.	.	.	.	.	.
3	18519558	ENSSSCG00000027946	A	.	.	.	.	.	.	.	.	.	.	.	.	G	99	63	G	G	99	80	G
3	18519597	ENSSSCG00000027946	G	.	.	.	.	.	.	.	.	.	.	.	.	C	99	66	C	C	99	76	S
3	18521298	ENSSSCG00000027946	G	.	.	.	.	.	.	.	.	.	.	.	.	A	99	60	R	A	99	65	A
3	18521343	ENSSSCG00000027946	G	.	.	.	.	.	.	.	.	.	.	.	.	A	99	51	A	A	99	40	A
3	18533928	ENSSSCG00000027946	T	.	.	.	.	.	.	.	.	.	.	.	.	C	93	16	C	C	99	22	C
3	84226967	ENSSSCG00000028100	T	.	.	.	.	.	.	.	.	.	.	.	.	G	33	6	G	G	33	6	G
3	139880671	ENSSSCG00000028140	A	.	.	.	.	.	.	.	.	.	.	.	.	G	51	10	G	G	45	8	G
3	139880691	ENSSSCG00000028140	T	.	.	.	.	.	.	.	.	.	.	.	.	G	51	9	G	G	33	6	G
3	43917840	ENSSSCG00000028185	T	.	.	.	.	.	.	.	.	.	.	.	.	C	99	52	C	C	58	49	Y
3	62223797	ENSSSCG00000028287	T	.	.	.	.	.	.	.	.	.	.	.	.	C	99	17	Y	C	99	16	Y
3	5144078	ENSSSCG00000028354	G	.	.	.	.	.	.	.	.	.	.	.	.	T	99	44	K	T	99	78	K
3	40660363	ENSSSCG00000028381	T	.	.	.	.	.	.	.	.	.	.	.	.	C	75	13	C	C	39	7	C
3	34426059	ENSSSCG00000028454	T	.	.	.	.	.	.	.	.	.	.	.	.	C	82	14	Y	C	99	39	Y
3	140586113	ENSSSCG00000028755	G	.	.	.	.	.	.	.	.	.	.	.	.	T	99	50	K	T	99	74	K
3	140617779	ENSSSCG00000028755	T	C	99	35	Y	C	84	14	Y	C	99	19	Y	.	.	.	.	.	.	.	.
3	140645139	ENSSSCG00000028755	C	.	.	.	.	.	.	.	.	.	.	.	.	T	99	65	Y	T	99	32	Y
3	140468775	ENSSSCG00000029161	C	T	84	39	Y	T	82	27	Y	T	99	31	T	.	.	.	.	.	.	.	.
3	18483352	ENSSSCG00000029186	G	.	.	.	.	.	.	.	.	.	.	.	.	A	77	18	R	A	86	7	R
3	18485451	ENSSSCG00000029186	G	.	.	.	.	.	.	.	.	.	.	.	.	A	75	13	A	A	69	6	R
3	18485532	ENSSSCG00000029186	T	.	.	.	.	.	.	.	.	.	.	.	.	G	87	15	G	G	67	5	K
3	18485869	ENSSSCG00000029186	T	.	.	.	.	.	.	.	.	.	.	.	.	A	79	9	W	A	86	6	W
3	18485935	ENSSSCG00000029186	G	.	.	.	.	.	.	.	.	.	.	.	.	T	75	8	K	T	39	7	T
3	18489444	ENSSSCG00000029186	T	.	.	.	.	.	.	.	.	.	.	.	.	C	99	23	C	C	51	9	C
3	18489579	ENSSSCG00000029186	A	.	.	.	.	.	.	.	.	.	.	.	.	G	88	16	R	G	99	12	R
3	26913208	ENSSSCG00000029212	C	.	.	.	.	.	.	.	.	.	.	.	.	T	33	6	T	T	33	6	T
3	26922412	ENSSSCG00000029212	A	.	.	.	.	.	.	.	.	.	.	.	.	G	27	5	G	G	51	10	G
3	40492835	ENSSSCG00000029264	G	.	.	.	.	.	.	.	.	.	.	.	.	A	51	9	A	A	61	7	R
3	135174361	ENSSSCG00000029313	A	.	.	.	.	.	.	.	.	.	.	.	.	G	33	6	G	G	99	20	G
3	135294546	ENSSSCG00000029313	C	.	.	.	.	.	.	.	.	.	.	.	.	A	51	9	A	A	99	28	A
3	135294572	ENSSSCG00000029313	C	.	.	.	.	.	.	.	.	.	.	.	.	T	93	16	T	T	99	39	T
3	135295337	ENSSSCG00000029313	T	.	.	.	.	.	.	.	.	.	.	.	.	C	99	30	C	C	99	45	C
3	120648808	ENSSSCG00000029413	C	.	.	.	.	.	.	.	.	.	.	.	.	T	83	7	Y	T	69	6	Y
3	120653601	ENSSSCG00000029413	A	.	.	.	.	.	.	.	.	.	.	.	.	G	68	5	R	G	99	11	R
3	18555649	ENSSSCG00000029509	G	.	.	.	.	.	.	.	.	.	.	.	.	A	99	32	R	A	99	33	R
3	98146225	ENSSSCG00000029593	C	.	.	.	.	.	.	.	.	.	.	.	.	T	27	6	T	T	87	16	T
3	98146373	ENSSSCG00000029593	A	.	.	.	.	.	.	.	.	.	.	.	.	G	39	7	G	G	39	7	G
3	125606678	ENSSSCG00000030115	G	.	.	.	.	.	.	.	.	.	.	.	.	A	65	8	R	A	51	9	A
3	10943884	ENSSSCG00000030378	A	.	.	.	.	.	.	.	.	.	.	.	.	C	27	5	C	C	62	7	M
3	10960343	ENSSSCG00000030378	A	.	.	.	.	.	.	.	.	.	.	.	.	G	27	5	G	G	85	12	R
3	17545666	ENSSSCG00000030798	C	.	.	.	.	.	.	.	.	.	.	.	.	T	87	16	T	T	99	23	T
3	17552808	ENSSSCG00000030798	T	.	.	.	.	.	.	.	.	.	.	.	.	C	45	8	C	C	99	20	C
3	59885505	ENSSSCG00000031064	C	T	33	31	T	T	99	21	Y	T	99	26	Y	.	.	.	.	.	.	.	.
3	49812243	intergenic	A	.	.	.	.	.	.	.	.	.	.	.	.	G	33	6	G	G	61	7	R
3	19112206	intergenic	G	A	99	66	A	A	99	35	A	A	99	25	A	.	.	.	.	.	.	.	.
3	54893648	intergenic	T	.	.	.	.	.	.	.	.	.	.	.	.	C	57	10	C	C	51	9	C
3	11074245	intergenic	A	.	.	.	.	.	.	.	.	.	.	.	.	G	57	10	G	G	63	14	R
3	128213937	intergenic	G	.	.	.	.	.	.	.	.	.	.	.	.	A	46	12	R	A	59	5	R
3	62307153	intergenic	A	.	.	.	.	.	.	.	.	.	.	.	.	G	92	23	R	G	99	34	R
3	62304942	intergenic	T	.	.	.	.	.	.	.	.	.	.	.	.	C	51	9	C	C	75	13	C
3	75914531	intergenic	T	.	.	.	.	.	.	.	.	.	.	.	.	C	33	6	C	C	75	13	C
3	40953677	intergenic	T	.	.	.	.	.	.	.	.	.	.	.	.	C	69	12	C	C	99	12	Y
3	118313977	intergenic	C	.	.	.	.	.	.	.	.	.	.	.	.	T	45	10	T	T	93	16	T
3	1167245	intergenic	C	.	.	.	.	.	.	.	.	.	.	.	.	G	99	35	G	G	99	15	S
3	59885543	intergenic	C	G	99	27	G	G	37	10	G	G	69	17	G	.	.	.	.	.	.	.	.
3	139857643	intergenic	C	.	.	.	.	.	.	.	.	.	.	.	.	T	63	8	Y	T	46	13	Y
3	810225	intergenic	T	.	.	.	.	.	.	.	.	.	.	.	.	C	99	31	Y	C	70	14	Y
3	18228690	intergenic	G	.	.	.	.	.	.	.	.	.	.	.	.	A	50	10	R	A	63	13	R
3	129317375	intergenic	C	.	.	.	.	.	.	.	.	.	.	.	.	T	57	10	T	T	46	15	Y
3	40865376	intergenic	A	.	.	.	.	.	.	.	.	.	.	.	.	G	99	27	G	G	87	29	R
3	75913268	intergenic	A	.	.	.	.	.	.	.	.	.	.	.	.	G	99	29	G	G	99	68	R
3	137667572	intergenic	A	.	.	.	.	.	.	.	.	.	.	.	.	C	71	9	M	C	99	70	M
3	129318108	intergenic	G	.	.	.	.	.	.	.	.	.	.	.	.	A	99	30	R	A	99	22	A
[truncated: 6,919 more rows]
