# Supplementary material for: Whole Blood Transcriptome Sequencing Reveals Gene Expression Differences between Dapulian and Landrace Piglets
Source: Hindawi journal article supplement (doi:10.1155/2016/7907980), 2016-01-01
Supplement: f3 [file 7907980.f3.pdf]

# List of DEGs (FDR<0.01) and the log fold changes in whole blood of DL and Landrace piglets

| Sus scrofa Ensemble ID | Gene     | Description                                                                           | FDR<0.01 | Fold change<br>(Landrace/DPL) |
|------------------------|----------|---------------------------------------------------------------------------------------|----------|-------------------------------|
| ENSSSCG00000000045     | NDUFA6   | NADH dehydrogenase (ubiquinone) 1 alpha subcomplex, 6, 14kDa [ Sus scrofa]            | 0.0058   | 3.08 down                     |
| ENSSSCG00000000047     |          | NADH dehydrogenase [ubiquinone] 1 alpha subcomplex subunit 6-like [ Sus scrofa]       | 0.0012   | 5.67 up                       |
| ENSSSCG00000000572     | CMAS     | Cytidine monophosphate N-acetylneuraminic acid synthetase [ Sus scrofa]               | 0.0012   | 1.66 up                       |
| ENSSSCG00000000712     | VWF      | Von Willebrand factor [ Sus scrofa]                                                   | 0.0061   | 2.68 up                       |
| ENSSSCG00000001735     | RHAG     | Rh-associated glycoprotein [Sus scrofa]                                               | 0.0002   | 2.13 up                       |
| ENSSSCG00000002033     | CEBPE    | CCAAT/enhancer binding protein (C/EBP), epsilon [Sus scrofa]                          | 1.28E-05 | 2.27 down                     |
| ENSSSCG00000002471     | ISG12(A) | Putative ISG12(a) protein [Sus scrofa]                                                | 1.88E-09 | 2.76 down                     |
| ENSSSCG00000003586     | EPB41    | Erythrocyte membrane protein band 4.1 [Sus scrofa]                                    | 0.0034   | 1.81 up                       |
| ENSSSCG00000003714     | HRH4     | Histamine H4 receptor [Sus scrofa]                                                    | 3.51E-08 | 4.07 down                     |
| ENSSSCG00000003746     |          | 40S ribosomal protein SA [Sus scrofa]                                                 | 0.0036   | Inf up                        |
| ENSSSCG00000004541     | FECH     | Ferrochelatase [ Sus scrofa]                                                          | 1.53E-06 | 2.28 up                       |
| ENSSSCG00000004875     | CYB5A    | Cytochrome b5 type A (microsomal) [Sus scrofa]                                        | 0.0003   | 2.07 up                       |
| ENSSSCG00000006140     | CA2      | Carbonic anhydrase II [ Sus scrofa]                                                   | 2.52E-05 | 2.15 up                       |
| ENSSSCG00000006788     | ADORA3   | Adenosine A3 receptor [ Sus scrofa]                                                   | 0.0023   | 2.59 down                     |
| ENSSSCG00000007115     | THBD     | Thrombomodulin [Sus scrofa]                                                           | 0.0004   | 2.67 down                     |
| ENSSSCG00000007140     | SMOX     | Spermine oxidase [Sus scrofa]                                                         | 0.0060   | 1.48 up                       |
| ENSSSCG00000007181     |          | Tyrosine-protein phosphatase non-receptor type substrate 1-like, partial [Sus scrofa] | 0.0004   | 2.09 up                       |
| ENSSSCG00000007229     | BCL-XL   | BCL2-like 1 [Sus scrofa]                                                              | 0.0001   | 2.06 up                       |
| ENSSSCG00000008012     | HAGH     | Hydroxyacylglutathione hydrolase, mitochondrial-like [Sus scrofa]                     | 0.0008   | 1.71 up                       |
| ENSSSCG00000008205     |          | Ig kappa chain V-I region HK102-like [Sus scrofa]                                     | 0.0002   | 5.98 up                       |
| ENSSSCG00000008216     | RMND5A   | Required for meiotic nuclear division 5 homolog A [Sus scrofa]                        | 0.0002   | 1.92 up                       |
| ENSSSCG00000008228     | GNLY     | Granulysin [ Sus scrofa]                                                              | 0.0012   | 1.81 up                       |
| ENSSSCG00000008842     | KIT      | V-kit Hardy-Zuckerman 4 feline sarcoma viral oncogene homolog [Sus scrofa]            | 0.0011   | 3.92 up                       |
| ENSSSCG00000009561     | ATP4B    | ATPase, H+/K+ exchanging, beta polypeptide [Sus scrofa]                               | 5.32E-08 | 7.47 up                       |
| ENSSSCG00000009610     | NPM2     | Nucleophosmin/nucleoplasmin 2 [Sus scrofa]                                            | 0.0023   | 3.76 down                     |
| ENSSSCG00000009675     | PNOC     | Prepronociceptin [ Sus scrofa]                                                        | 0.0067   | 1.66 up                       |
| ENSSSCG00000010340     | FAM213A  | Family with sequence similarity 213, member A[Sus scrofa]                             | 8.44E-06 | 2.14 up                       |
| ENSSSCG00000010399     | NCOA4    | Nuclear receptor coactivator 4 [Sus scrofa]                                           | 0.0006   | 1.96 up                       |
| ENSSSCG00000010772     | ADAM8    | ADAM metallopeptidase domain 8 [Sus scrofa]                                           | 0.0039   | 1.47 down                     |
| ENSSSCG00000010806     | RGS2     | Regulator of G-protein signaling 2 [Sus scrofa]                                       | 0.0015   | 1.58 down                     |
| ENSSSCG00000011387     |          | Ring finger protein 123 [ Sus scrofa]                                                 | 0.0008   | 1.70 up                       |
| ENSSSCG00000012060     | RIPPLY3  | Ripply transcriptional repressor 3 [Sus scrofa]                                       | 3.65E-05 | Inf up                        |
| ENSSSCG00000012076     | MX2      | Myxovirus (influenza virus) resistance 2 (mouse) [Sus scrofa]                         | 0.0039   | 1.56 down                     |
| ENSSSCG00000013882     | FAM129C  | Family with sequence similarity 129, member C [Sus scrofa]                            | 0.0039   | 1.76 up                       |
| ENSSSCG00000014441     | CSF1R    | Colony stimulating factor 1 receptor [Sus scrofa]                                     | 0.0038   | 1.53 up                       |

|                    |          |                                                                                                  |          |           |
|--------------------|----------|--------------------------------------------------------------------------------------------------|----------|-----------|
| ENSSSCG00000014851 | SLCO2B1  | Solute carrier organic anion transporter family, member 2B1 [Sus scrofa]                         | 2.77E-06 | 2.64 down |
| ENSSSCG00000014965 | ENDOD1   | Endonuclease domain containing 1 [Sus scrofa]                                                    | 6.17E-08 | 2.50 up   |
| ENSSSCG00000015056 | REXO2    | RNA exonuclease 2 [Sus scrofa]                                                                   | 0.0031   | 1.89 up   |
| ENSSSCG00000015102 | CCDC84   | Coiled-coil domain containing 84 [Sus scrofa]                                                    | 0.0008   | 1.83 down |
| ENSSSCG00000015287 | TMCC2    | Transmembrane and coiled-coil domain family 2 [Sus scrofa]                                       | 0.0008   | 1.72 up   |
| ENSSSCG00000015617 | G0S2     | G0/G1 switch 2 [Sus scrofa]                                                                      | 0.0012   | 6.00 down |
| ENSSSCG00000016056 | GLS      | Glutaminase [Sus scrofa]                                                                         | 2.65E-06 | 2.68 down |
| ENSSSCG00000016676 | INMT     | Indolethylamine N-methyltransferase [Sus scrofa]                                                 | 1.06E-09 | 2.85 up   |
| ENSSSCG00000016902 | GZMA     | Granzyme A (granzyme 1, cytotoxic T-lymphocyte-associated serine esterase 3) [Sus scrofa]        | 0.0004   | 5.36 down |
| ENSSSCG00000016903 | GZMA     | Granzyme A (granzyme 1, cytotoxic T-lymphocyte-associated serine esterase 3) [Sus scrofa]        | 2.65E-06 | 2.10 down |
| ENSSSCG00000017358 | SLC4A1   | Solute carrier family 4 (anion exchanger), member 1 (Diego blood group) [Sus scrofa]             | 0.0001   | 1.91 up   |
| ENSSSCG00000017359 | RUNDC3A  | RUN domain containing 3A [Sus scrofa]                                                            | 0.0001   | 1.93 up   |
| ENSSSCG00000017446 |          | L antigen family member 3-like [Sus scrofa]                                                      | 0.0018   | Inf up    |
| ENSSSCG00000017923 | ALOX15   | Arachidonate 15-lipoxygenase [Sus scrofa]                                                        | 0.0004   | 2.9 down  |
| ENSSSCG00000020882 |          | Apolipoprotein L3-like [Sus scrofa]                                                              | 0.0010   | 1.93 up   |
| ENSSSCG00000021627 | SMIM5    | Small integral membrane protein 5 [Sus scrofa]                                                   | 5.19E-06 | 2.57 up   |
| ENSSSCG00000021803 | RANBP10  | RAN binding protein 10 [Sus scrofa]                                                              | 0.0039   | 1.55 up   |
| ENSSSCG00000022351 | GSTO1    | Glutathione S-transferase omega 1 [Sus scrofa]                                                   | 0.0040   | 2.44 up   |
| ENSSSCG00000022485 |          | Signal transducer and activator of transcription 6-like [Sus scrofa]                             | 1.21E-09 | Inf up    |
| ENSSSCG00000022737 | MYD88-2  | Myeloid differentiation primary response protein MyD88-like [Sus scrofa]                         | 0.0001   | Inf up    |
| ENSSSCG00000022912 | NT5C3A   | 5'-nucleotidase, cytosolic IIIA [Sus scrofa]                                                     | 0.0036   | 1.57 up   |
| ENSSSCG00000023108 |          | Essential MCU regulator, mitochondrial-like [Sus scrofa]                                         | 5.27E-06 | 3.86 up   |
| ENSSSCG00000023157 | HAGH     | Hydroxyacylglutathione hydrolase [Sus scrofa]                                                    | 0.0002   | 1.83 up   |
| ENSSSCG00000023383 |          | GPI transamidase component PIG-S-like [Sus scrofa]                                               | 0.0004   | -Inf down |
| ENSSSCG00000023456 |          | Homocysteine-responsive endoplasmic reticulum-resident ubiquitin-like domain member [Sus scrofa] | 0.0014   | 2.29 up   |
| ENSSSCG00000023710 | REEP1    | Receptor accessory protein 1 [Sus scrofa]                                                        | 3.95E-11 | 3.06 up   |
| ENSSSCG00000024791 | CD59     | CD59 molecule, complement regulatory protein [Sus scrofa]                                        | 8.64E-05 | 2.42 down |
| ENSSSCG00000024973 | GBP5     | Guanylate-binding protein 5 [Sus scrofa]                                                         | 0.0006   | 2.32 down |
| ENSSSCG00000025972 | NTAN1    | Protein N-terminal asparagine amidohydrolase [Sus scrofa]                                        | 0.0040   | 1.67 up   |
| ENSSSCG00000026352 |          | Protein unc-119 homolog A [Sus scrofa]                                                           | 0.0005   | -Inf down |
| ENSSSCG00000026701 | PHOSPHO1 | Phosphatase, orphan 1 [Sus scrofa]                                                               | 0.0042   | 2.32 up   |
| ENSSSCG00000027995 |          | Indolethylamine N-methyltransferase [Sus scrofa]                                                 | 0.0002   | 2.53 up   |
| ENSSSCG00000028274 | FAM131B  | Family with sequence similarity 131, member B [Sus scrofa]                                       | 0.0039   | 2.17 up   |
| ENSSSCG00000028299 | ACAA     | 3-ketoacyl-CoA thiolase, peroxisomal-like [Sus scrofa]                                           | 0.0067   | Inf up    |
| ENSSSCG00000028664 | NPG1     | Protegrin 1 [Sus scrofa]                                                                         | 8.44E-06 | 3.64 up   |
| ENSSSCG00000028998 |          | La ribonucleoprotein domain family, member 7-like [Sus scrofa]                                   | 0.0003   | 3.48 down |
| ENSSSCG00000029075 |          | Long-chain-fatty-acid--CoA ligase 5-like [Sus scrofa]                                            | 8.64E-05 | Inf down  |

|                    |       |                                               |          |         |
|--------------------|-------|-----------------------------------------------|----------|---------|
| ENSSSCG00000029889 | CST3  | Cystatin C [Sus scrofa]                       | 0.0011   | 1.66 up |
| ENSSSCG00000029901 | UBE2O | Ubiquitin-conjugating enzyme E2O [Sus scrofa] | 5.98E-05 | 2.33 up |

---
